# Supplementary material for: Automatic identification of species with neural networks
Source: PeerJ. 2014 Nov 4;2:e563. doi: 10.7717/peerj.563 (PMC4226643; doi:10.7717/peerj.563)
Supplement: Data S1 — Feature values for the neural Networks. [file peerj-02-563-s002.xlsx]

## Sheet: Data Base
Colletion	Specie	Area	Perimeter	Diameter	Compatibility	Compactness	Solidity	Median	Variance	Uniformity	Entropy co-occurrence	Homogeneity	Inertia	Ami1	Ami2	Hu1
FC-MZUSP	Abramites hypselonotus	1353	190.184	41.5053	0.470068	2.12735	0.897215	0.346452	15.5253	0.548749	0.78556	0.992185	0.0679532	3.5891e-17	-1.35267e-25	0.346992
FC-MZUSP	Abramites hypselonotus	25422	1108.48	179.912	0.259997	3.8462	0.566204	0.0184388	0.042444	0.523193	0.757878	0.992212	0.0517544	9.00484e-18	5.82353e-25	0.601862
FC-MZUSP	Abramites hypselonotus	92066	1293.61	342.377	0.691362	1.44642	0.886162	0.00509146	0.000768813	0.441123	0.896038	0.992583	0.0881203	-4.76565e-23	-6.88109e-34	0.218363
FC-MZUSP	Abramites hypselonotus	95269	1315.71	348.282	0.691583	1.44596	0.896776	0.00492028	0.000633053	0.441833	0.896038	0.991236	0.0973601	2.10526e-23	1.51631e-32	0.211718
FC-MZUSP	Abramites hypselonotus	96425	1388.66	350.389	0.62836	1.59145	0.880722	0.00486129	0.000701655	0.352879	0.857148	0.989085	0.127093	3.22031e-22	1.24355e-31	0.209316
FC-MZUSP	Abramites hypselonotus	96547	1365.23	350.61	0.650936	1.53625	0.890294	0.00485515	0.000659862	0.364216	0.896038	0.988322	0.143993	1.33568e-23	2.47734e-32	0.19392
FC-MZUSP	Abramites hypselonotus	96806	1377.73	351.08	0.640891	1.56033	0.878481	0.00484216	0.000684354	0.392328	0.877437	0.98906	0.135698	-3.41318e-23	2.02738e-31	0.20148
FC-MZUSP	Abramites hypselonotus	97491	1416.8	352.32	0.610319	1.63849	0.86651	0.00480814	0.00064856	0.353993	0.857148	0.988301	0.133308	3.56847e-22	1.45898e-31	0.213194
FC-MZUSP	Abramites hypselonotus	99532	1366.29	355.989	0.670017	1.4925	0.862025	0.00470954	0.000524917	0.362753	0.78556	0.99014	0.12523	2.28092e-22	1.64854e-31	0.220532
FC-MZUSP	Abramites hypselonotus	89792	2131.54	338.122	0.248347	4.02662	0.816298	0.0052204	0.00111811	0.304765	0.78556	0.98941	0.132331	2.95422e-21	1.63962e-30	0.224716
FC-MZUSP	Abramites hypselonotus	51202	1157.33	255.328	0.480379	2.08169	0.819691	0.00915492	0.00280744	0.309047	0.835116	0.988606	0.123216	1.11885e-21	8.4271e-31	0.313169
FC-MZUSP	Abramites hypselonotus	1168	162.77	38.5635	0.553996	1.80507	0.905426	0.401327	25.0912	0.618748	0.857148	0.99083	0.0955973	-3.25686e-17	-4.5422e-25	0.256858
FC-MZUSP	Abramites hypselonotus	1185	161.012	38.8431	0.574395	1.74096	0.955645	0.39557	22.1186	0.583616	0.757878	0.991481	0.0712114	4.30195e-18	1.86373e-24	0.266089
FC-MZUSP	Abramites hypselonotus	1437	180.912	42.7744	0.551739	1.81245	0.921154	0.3262	9.25975	0.461541	0.757878	0.990734	0.0889641	6.38306e-18	1.18791e-26	0.254502
FC-MZUSP	Abramites hypselonotus	1655	249.598	45.9044	0.33383	2.99553	0.7533	0.283233	11.8562	0.592546	0.896038	0.989887	0.0485297	-8.76791e-17	-1.45924e-24	0.55854
FC-MZUSP	Abramites hypselonotus	2015	199.154	50.6515	0.638418	1.56637	0.938082	0.23263	7.8674	0.58978	0.757878	0.991804	0.0546617	3.56297e-17	7.68377e-24	0.201038
FC-MZUSP	Anostomus anostomus	87008	1937	332.839	0.291414	3.43155	0.865355	0.00538744	0.00134374	0.325723	0.877437	0.98393	0.186725	-1.23068e-24	-2.33061e-34	0.193691
FC-MZUSP	Anostomus anostomus	93504	1348.24	345.041	0.646407	1.54701	0.882346	0.00501315	0.000848788	0.429743	0.78556	0.987032	0.172047	3.90451e-24	1.93379e-33	0.193893
FC-MZUSP	Anostomus anostomus	94442	1328.93	346.767	0.672006	1.48808	0.872314	0.00496336	0.000795809	0.457424	0.857148	0.988529	0.143108	7.65171e-23	3.839e-32	0.20991
FC-MZUSP	Anostomus anostomus	94615	1912.82	347.084	0.324955	3.07735	0.87161	0.00495429	0.000803142	0.414233	0.928362	0.986826	0.16528	-9.34786e-24	3.32596e-34	0.200539
FC-MZUSP	Anostomus anostomus	98234	2200.08	353.66	0.255032	3.92108	0.828413	0.00477177	0.000521817	0.366348	0.954434	0.99163	0.106491	7.50206e-23	3.66496e-32	0.234513
FC-MZUSP	Anostomus anostomus	99805	1400.42	356.477	0.639511	1.5637	0.86087	0.00469666	0.000533951	0.434137	0.896038	0.986045	0.158947	8.37412e-24	1.50895e-32	0.216808
FC-MZUSP	Anostomus anostomus	100789	1385.45	358.23	0.659848	1.5155	0.862639	0.00465081	0.000522089	0.326478	0.696212	0.987184	0.265104	1.00145e-23	7.98239e-33	0.216962
FC-MZUSP	Anostomus anostomus	101489	1402.32	359.472	0.648541	1.54192	0.873144	0.00461873	0.000491422	0.441912	0.912999	0.98751	0.155631	1.71575e-23	1.08684e-32	0.213203
FC-MZUSP	Anostomus anostomus	92266	1317.02	342.749	0.668447	1.496	0.847122	0.00508042	0.000792012	0.314833	0.696212	0.991107	0.1568	-4.6776e-24	6.26521e-33	0.225858
FC-MZUSP	Anostomus anostomus	96910	2061.02	351.269	0.286692	3.48806	0.869436	0.00483696	0.00059879	0.366608	0.696212	0.991103	0.186282	8.27408e-24	1.97325e-33	0.21205
FC-MZUSP	Anostomus anostomus	97138	2133.22	351.682	0.268243	3.72796	0.866174	0.00482561	0.000613159	0.298712	0.835116	0.990935	0.18655	2.48474e-23	2.8763e-33	0.209121
FC-MZUSP	Anostomus anostomus	97405	1389.96	352.165	0.633562	1.57838	0.921114	0.00481238	0.000631427	0.413891	0.857148	0.986929	0.255973	3.6696e-24	8.65872e-34	0.198265
FC-MZUSP	Anostomus anostomus	99654	1368.92	356.207	0.668266	1.49641	0.874603	0.00470378	0.000491206	0.37873	0.696212	0.990728	0.165931	-2.30073e-23	-2.17106e-34	0.21354
FC-MZUSP	Anostomus anostomus	102206	1336.84	360.739	0.718671	1.39146	0.89344	0.00458633	0.000360941	0.363275	0.728134	0.993893	0.120201	-7.95859e-24	2.9225e-34	0.208521
FC-MZUSP	Anostomus anostomus	89388	2369.28	337.361	0.200104	4.99741	0.811873	0.00524399	0.00116455	0.352694	0.835116	0.989938	0.214353	1.62439e-22	1.05658e-31	0.241858
FC-MZUSP	Anostomus anostomus	1169	145.497	38.58	0.693926	1.44107	0.973356	0.400984	22.9053	0.57304	0.928362	0.988589	0.0798079	2.89843e-17	2.75815e-25	0.208526
FC-MZUSP	Anostomus anostomus	95077	1340.19	347.931	0.6652	1.50331	0.847842	0.00493021	0.000720431	0.378344	0.835116	0.989552	0.21462	-1.2218e-23	2.40098e-33	0.224869
FC-MZUSP	Anostomus ternetzi	94971	1377.3	347.737	0.629132	1.58949	0.860167	0.00493572	0.000670113	0.320797	0.835116	0.990595	0.172406	1.75229e-22	4.01015e-32	0.224439
FC-MZUSP	Anostomus ternetzi	42232	1143.81	231.887	0.40564	2.46524	0.806031	0.0110994	0.013854	0.463503	0.912999	0.987185	0.096416	3.70074e-20	2.34213e-27	0.250712
FC-MZUSP	Anostomus ternetzi	89381	1332.72	337.348	0.632374	1.58134	0.871721	0.0052444	0.00119273	0.346954	0.912999	0.988084	0.154478	-1.51196e-22	-5.27295e-33	0.207459
FC-MZUSP	Anostomus ternetzi	92772	1403.63	343.687	0.591728	1.68997	0.85158	0.00505271	0.000847098	0.39157	0.78556	0.98784	0.205188	5.83272e-23	3.44331e-32	0.209798
FC-MZUSP	Anostomus ternetzi	94421	1349.19	346.728	0.651831	1.53414	0.869598	0.00496447	0.00069436	0.348176	0.835116	0.990197	0.123684	5.14208e-24	5.93723e-33	0.218796
FC-MZUSP	Anostomus ternetzi	95115	2158.79	348	0.256471	3.89908	0.862666	0.00492824	0.000730149	0.367945	0.78556	0.991182	0.13381	-1.72236e-25	2.75998e-34	0.213545
FC-MZUSP	Anostomus ternetzi	95550	2029.86	348.795	0.291412	3.43157	0.880718	0.00490581	0.000687384	0.389986	0.78556	0.9883	0.173509	3.41022e-24	3.74066e-34	0.205902
FC-MZUSP	Anostomus ternetzi	95964	1331.3	349.55	0.6804	1.46972	0.872678	0.00488464	0.000620895	0.472829	0.78556	0.99281	0.141479	-2.5469e-23	1.16112e-33	0.216902
FC-MZUSP	Anostomus ternetzi	99142	1320.43	355.291	0.714553	1.39948	0.882297	0.00472807	0.000481632	0.385004	0.78556	0.990657	0.146466	-4.11384e-23	8.84148e-34	0.210452
FC-MZUSP	Anostomus ternetzi	100453	1310.72	357.632	0.734775	1.36096	0.901514	0.00466636	0.000452512	0.477925	0.811278	0.991672	0.128346	-5.16659e-24	4.25667e-34	0.204319
FC-MZUSP	Anostomus ternetzi	94506	1335.57	346.884	0.665787	1.50198	0.856537	0.00496	0.000738097	0.433339	0.857148	0.989659	0.205806	-3.973e-25	2.71161e-34	0.222075
FC-MZUSP	Anostomus ternetzi	95930	1335.08	349.488	0.676318	1.47859	0.823469	0.00488638	0.000602265	0.458446	0.811278	0.991174	0.147452	-2.68808e-24	5.68456e-34	0.237221
FC-MZUSP	Anostomus ternetzi	87029	1366.43	332.88	0.585729	1.70727	0.881681	0.00538614	0.00113527	0.305232	0.835116	0.991879	0.156408	1.6574e-22	8.90023e-33	0.213765
FC-MZUSP	Anostomus ternetzi	92697	2041.32	343.548	0.279547	3.57722	0.828865	0.0050568	0.000811738	0.306635	0.811278	0.991166	0.179373	1.45253e-24	1.5275e-33	0.219615
FC-MZUSP	Anostomus ternetzi	93748	1402.27	345.49	0.599109	1.66914	0.847692	0.00500011	0.000784929	0.271913	0.928362	0.986219	0.365246	2.47688e-23	9.65063e-33	0.211212
FC-MZUSP	Anostomus ternetzi	94615	1387.09	347.084	0.617964	1.61822	0.853233	0.00495429	0.000771005	0.313681	0.835116	0.989862	0.199549	1.22646e-22	1.81757e-32	0.219018
FC-MZUSP	Anostomus ternetzi	100221	1375.35	357.219	0.665802	1.50195	0.886904	0.00467716	0.000493346	0.415136	0.811278	0.988851	0.158037	1.23511e-24	2.23846e-34	0.206336
FC-MZUSP	Anostomus ternetzi	100668	1335.02	358.015	0.709784	1.40888	0.879419	0.0046564	0.000435266	0.42873	0.78556	0.990493	0.15665	4.4285e-24	1.40697e-33	0.214591
FC-MZUSP	Anostomus ternetzi	103396	1363.78	362.833	0.698592	1.43145	0.866696	0.00453354	0.000310228	0.360494	0.78556	0.991135	0.122348	5.70738e-25	2.36769e-34	0.220721
FC-MZUSP	Anostomus ternetzi	1051	150.184	36.5811	0.585554	1.70779	0.926808	0.446004	27.2462	0.55116	0.993651	0.987908	0.176241	3.13893e-18	3.54318e-26	0.262216
FC-MZUSP	Brycon amazonicus	1536	174.326	44.2233	0.635151	1.57443	0.95463	0.305176	16.1764	0.683667	0.912999	0.990985	0.0532999	2.16717e-15	-1.57715e-23	0.221547
FC-MZUSP	Brycon amazonicus	3372	271.439	65.5238	0.575114	1.73878	0.905965	0.139012	3.03143	0.621688	0.974489	0.990136	0.075447	2.36375e-17	2.61729e-24	0.234419
FC-MZUSP	Brycon amazonicus	97241	1430.16	351.868	0.597437	1.67382	0.877397	0.0048205	0.000657136	0.428538	0.835116	0.987458	0.262657	2.08689e-25	-9.34581e-35	0.196096
FC-MZUSP	Brycon amazonicus	97387	1435.14	352.132	0.594182	1.68299	0.870989	0.00481327	0.000618254	0.331963	0.928362	0.988151	0.213584	-2.50434e-23	3.11522e-32	0.206002
FC-MZUSP	Brycon amazonicus	98781	1380.64	354.643	0.65121	1.5356	0.890665	0.00474535	0.000580671	0.449216	0.811278	0.986494	0.247744	-1.14605e-24	2.62394e-34	0.196186
FC-MZUSP	Brycon amazonicus	98916	1445.11	354.886	0.595216	1.68006	0.888917	0.00473887	0.000725825	0.400045	0.835116	0.982857	0.368822	-4.99642e-23	-6.0576e-34	0.19643
FC-MZUSP	Brycon amazonicus	99398	1358.6	355.749	0.676713	1.47773	0.897596	0.00471589	0.000512603	0.38159	0.811278	0.987608	0.206725	1.98735e-24	2.09622e-34	0.193577
FC-MZUSP	Brycon amazonicus	99499	1374.94	355.93	0.661392	1.51196	0.876296	0.0047111	0.00052492	0.412477	0.835116	0.987447	0.206182	1.24827e-25	2.18835e-33	0.206937
FC-MZUSP	Brycon amazonicus	101645	1384.9	359.748	0.665975	1.50156	0.885679	0.00461164	0.000464549	0.383085	0.811278	0.988507	0.211036	-3.3509e-23	4.88018e-34	0.205684
FC-MZUSP	Brycon amazonicus	102330	2174.26	360.958	0.272012	3.67631	0.866286	0.00458077	0.000421171	0.420418	0.896038	0.99008	0.17619	9.11419e-24	1.79364e-33	0.213863
FC-MZUSP	Brycon amazonicus	102596	1364.45	361.427	0.692508	1.44403	0.870771	0.00456889	0.000376998	0.475099	0.857148	0.991025	0.163083	-4.40346e-24	1.87241e-34	0.219327
FC-MZUSP	Brycon amazonicus	104225	1373.85	364.285	0.693912	1.4411	0.890957	0.00449748	0.000342073	0.477507	0.835116	0.98967	0.169557	3.21647e-24	5.90219e-34	0.207746
FC-MZUSP	Brycon amazonicus	1260	152.912	40.0535	0.677172	1.47673	0.95672	0.372024	17.8284	0.52501	0.877437	0.98833	0.102448	3.7089e-19	1.7455e-28	0.212234
FC-MZUSP	Brycon amazonicus	1276	156.083	40.307	0.658185	1.51933	0.961567	0.367359	18.2142	0.546053	0.896038	0.987014	0.101487	1.84703e-19	5.0544e-28	0.215982
FC-MZUSP	Brycon amazonicus	49976	1083.35	252.253	0.535103	1.8688	0.928922	0.0093795	0.00307442	0.282422	0.877437	0.987218	0.237243	-1.30962e-22	7.21427e-33	0.287287
FC-MZUSP	Brycon amazonicus	90381	2356.4	339.23	0.204546	4.88888	0.852852	0.00518638	0.00112331	0.277139	0.928362	0.989285	0.234645	1.9503e-24	1.44629e-32	0.214288
FC-MZUSP	Brycon amazonicus	90683	2325.75	339.796	0.210673	4.74669	0.858407	0.00516911	0.00108847	0.323003	0.835116	0.98895	0.198571	-2.51543e-23	2.30422e-33	0.215898
FC-MZUSP	Brycon amazonicus	92767	1338.6	343.678	0.650581	1.53709	0.874434	0.00505298	0.000836768	0.356055	0.835116	0.987864	0.19619	-2.25425e-23	1.25146e-33	0.217538
FC-MZUSP	Brycon amazonicus	93767	1370.7	345.525	0.627155	1.5945	0.866736	0.00499909	0.000808567	0.420142	0.835116	0.991193	0.1832	1.56669e-23	2.61231e-33	0.218639
FC-MZUSP	Brycon amazonicus	96644	1366.32	350.786	0.650553	1.53715	0.854901	0.00485028	0.000738937	0.426361	0.696212	0.990547	0.227928	-5.50148e-24	2.98169e-34	0.218318
FC-MZUSP	Brycon amazonicus	97018	2205.95	351.464	0.250537	3.99142	0.845208	0.00483158	0.000643057	0.440636	0.661976	0.989689	0.240986	-3.11634e-24	1.19943e-33	0.223111
FC-MZUSP	Brycon amazonicus	1037	148.426	36.3366	0.591516	1.69057	0.932554	0.452025	26.4739	0.531066	0.896038	0.988067	0.122966	1.10759e-17	1.60528e-26	0.248529
FC-MZUSP	Brycon amazonicus	39034	1310.06	222.934	0.285804	3.4989	0.777554	0.0120088	0.0181606	0.51114	0.965202	0.985648	0.115673	2.72797e-18	1.34555e-25	0.273301
FC-MZUSP	Brycon amazonicus	87515	2276.78	333.808	0.212153	4.71357	0.872611	0.00535622	0.00149644	0.36001	0.896038	0.985386	0.349006	1.4045e-22	3.25388e-32	0.198495
FC-MZUSP	Brycon cf dulcis	91179	1356.46	340.724	0.622719	1.60586	0.860658	0.00514099	0.000974641	0.331189	0.877437	0.987882	0.202632	9.48241e-26	2.31974e-35	0.206131
FC-MZUSP	Brycon cf dulcis	93463	2006.89	344.965	0.29161	3.42924	0.847806	0.00501535	0.00080407	0.37934	0.857148	0.986427	0.275739	-3.43505e-23	4.06666e-34	0.213005
FC-MZUSP	Brycon cf dulcis	94365	1320.58	346.626	0.67997	1.47065	0.911651	0.00496741	0.000890615	0.341991	0.928362	0.987007	0.23015	-1.96707e-24	2.20145e-34	0.196026
FC-MZUSP	Brycon cf dulcis	94757	2058.93	347.345	0.28089	3.56011	0.860317	0.00494686	0.000767982	0.328173	0.896038	0.987363	0.190226	-6.24842e-23	-1.3869e-33	0.206609
FC-MZUSP	Brycon cf dulcis	1067	149.255	36.8585	0.60189	1.66143	0.913527	0.439316	26.4515	0.557826	0.928362	0.991771	0.0771011	2.53314e-18	1.37477e-25	0.240247
FC-MZUSP	Brycon cf dulcis	15096	962.593	138.639	0.204732	4.88443	0.58582	0.0310513	0.14589	0.604976	0.835116	0.991619	0.0564077	1.24758e-18	4.99922e-26	1.07918
FC-MZUSP	Brycon cf dulcis	46620	1134.56	243.636	0.455123	2.19721	0.776198	0.0100547	0.00361373	0.402409	0.78556	0.989913	0.19462	7.17164e-23	4.25371e-32	0.35051
FC-MZUSP	Brycon cf dulcis	85830	1985.52	330.579	0.27359	3.6551	0.793958	0.00546138	0.00131688	0.346163	0.811278	0.990418	0.188003	4.85733e-22	1.48218e-31	0.225766
FC-MZUSP	Brycon cf dulcis	91181	1293.09	340.728	0.685267	1.45929	0.888401	0.00514087	0.000934214	0.386965	0.835116	0.987365	0.200518	2.05299e-25	9.0374e-35	0.205703
FC-MZUSP	Brycon cf dulcis	95670	1383.73	349.014	0.627889	1.59264	0.865839	0.00489966	0.000691026	0.395892	0.811278	0.989224	0.250284	4.44379e-23	7.07666e-33	0.211552
FC-MZUSP	Brycon cf dulcis	96401	1364.98	350.345	0.650183	1.53803	0.870587	0.0048625	0.000687846	0.439059	0.811278	0.990078	0.239357	1.99808e-23	2.31232e-33	0.214187
FC-MZUSP	Brycon cf dulcis	96862	1405.67	351.182	0.616021	1.62332	0.871877	0.00483936	0.000645914	0.438806	0.78556	0.989978	0.210844	1.50314e-23	2.86798e-33	0.209408
FC-MZUSP	Brycon cf dulcis	99317	1402.56	355.604	0.634441	1.57619	0.87718	0.00471974	0.000586944	0.45141	0.835116	0.986855	0.23066	-1.56092e-25	1.6421e-35	0.207454
FC-MZUSP	Brycon cf polylepis	93708	1314.27	345.417	0.681733	1.46685	0.882024	0.00500224	0.000811593	0.41883	0.661976	0.993333	0.169507	7.48197e-25	2.97928e-34	0.213111
FC-MZUSP	Brycon cf polylepis	100511	2047.96	357.735	0.301148	3.32063	0.875127	0.00466367	0.000497872	0.429677	0.835116	0.990623	0.225046	1.97193e-23	2.59965e-33	0.20879
FC-MZUSP	Brycon cf polylepis	2947	251.439	61.2555	0.585769	1.70716	0.927605	0.15906	3.99507	0.632774	0.728134	0.99318	0.0845113	-2.95352e-18	-1.69033e-25	0.231427
FC-MZUSP	Brycon cf polylepis	4361	369.054	74.5158	0.402362	2.48533	0.916176	0.107487	1.90361	0.659955	0.877437	0.9922	0.0747368	3.58751e-16	-3.09789e-26	0.403819
FC-MZUSP	Brycon cf polylepis	47231	1096.34	245.227	0.493795	2.02513	0.814777	0.00992463	0.00367314	0.42511	0.835116	0.989099	0.260635	4.36295e-24	1.13553e-33	0.312223
FC-MZUSP	Brycon cf polylepis	90024	1463.54	338.559	0.528155	1.89338	0.859697	0.00520694	0.00135083	0.363895	0.877437	0.980796	0.445723	-2.35183e-23	-5.65321e-34	0.21207
FC-MZUSP	Brycon cf polylepis	90202	2075	338.893	0.263263	3.79848	0.83635	0.00519667	0.00112987	0.309352	0.877437	0.988286	0.302272	6.41362e-22	8.46179e-32	0.226113
FC-MZUSP	Brycon cf polylepis	90252	1438.03	338.987	0.548441	1.82335	0.801008	0.00519379	0.000983565	0.305846	0.877437	0.991479	0.180175	-8.91804e-23	3.58193e-32	0.249031
FC-MZUSP	Brycon cf polylepis	91111	1331.03	340.597	0.64626	1.54736	0.842489	0.00514482	0.00105507	0.419467	0.728134	0.988979	0.254728	-2.28469e-23	-3.37792e-34	0.223398
FC-MZUSP	Brycon cf polylepis	99392	1345.89	355.738	0.689513	1.4503	0.872663	0.00471617	0.000517164	0.464478	0.78556	0.989834	0.153885	3.59743e-25	1.36708e-35	0.216435
FC-MZUSP	Brycon cf polylepis	1683	212.083	46.2911	0.470198	2.12676	0.875195	0.27852	10.0382	0.524825	0.954434	0.987849	0.166884	7.15998e-19	3.38284e-26	0.323104
FC-MZUSP	Brycon cf polylepis	96708	2024.77	350.902	0.296428	3.3735	0.876979	0.00484707	0.000644252	0.420201	0.857148	0.987646	0.180434	2.07506e-25	4.77045e-34	0.204534
FC-MZUSP	Brycon cf polylepis	96979	1439.09	351.394	0.588457	1.69936	0.874614	0.00483352	0.000673269	0.399035	0.811278	0.986631	0.205188	-8.91656e-24	7.69824e-34	0.206333
FC-MZUSP	Brycon cf polylepis	99751	1357.61	356.38	0.680112	1.47035	0.851932	0.0046992	0.000468671	0.370944	0.78556	0.992472	0.144887	3.94126e-24	1.40098e-33	0.224426
FC-MZUSP	Brycon falcatus	99796	2196.92	356.461	0.259834	3.84861	0.871748	0.00469708	0.000524042	0.422635	0.835116	0.988112	0.190292	-1.76818e-24	4.39174e-34	0.208697
FC-MZUSP	Brycon falcatus	102174	1415.4	360.683	0.640899	1.56031	0.874882	0.00458776	0.000397976	0.456671	0.835116	0.988495	0.142155	-4.62694e-24	1.59904e-34	0.211001
FC-MZUSP	Brycon falcatus	103184	1334.49	362.461	0.728098	1.37344	0.882971	0.00454286	0.000333346	0.498426	0.811278	0.987442	0.177803	-7.92923e-26	7.02279e-34	0.21368
FC-MZUSP	Brycon falcatus	1186	157.841	38.8595	0.598215	1.67164	0.937549	0.395236	20.4005	0.528804	0.988699	0.988169	0.127076	1.0242e-17	3.7575e-26	0.24457
FC-MZUSP	Brycon falcatus	92903	1988.39	343.93	0.295282	3.38659	0.857007	0.00504559	0.000862917	0.34164	0.811278	0.989145	0.204896	2.92328e-23	5.21909e-33	0.206729
FC-MZUSP	Brycon falcatus	97977	1384.48	353.197	0.642338	1.55681	0.851737	0.00478429	0.000537918	0.340806	0.78556	0.990798	0.147853	1.24176e-22	2.55293e-32	0.222177
FC-MZUSP	Brycon falcatus	1176	156.669	38.6953	0.602075	1.66092	0.925256	0.398597	19.328	0.511427	0.982317	0.989474	0.083467	-5.29844e-19	2.4046e-27	0.240374
FC-MZUSP	Brycon falcatus	42359	1247.24	232.235	0.342178	2.92245	0.773341	0.0110661	0.00745025	0.33368	0.78556	0.989874	0.199081	2.2892e-21	1.85128e-30	0.408238
FC-MZUSP	Brycon falcatus	90655	1343.62	339.743	0.631026	1.58472	0.837978	0.0051707	0.000841341	0.318829	0.835116	0.989959	0.167836	3.63143e-23	4.51477e-33	0.235234
FC-MZUSP	Brycon falcatus	91513	1394.94	341.347	0.590989	1.69208	0.866527	0.00512222	0.000912387	0.391211	0.811278	0.991038	0.165455	1.25345e-22	2.11676e-32	0.208683
FC-MZUSP	Brycon falcatus	93672	1329.26	345.35	0.666191	1.50107	0.851115	0.00500416	0.00074365	0.404268	0.811278	0.992729	0.124795	5.44472e-23	7.56836e-33	0.226246
FC-MZUSP	Brycon falcatus	93743	1358.09	345.481	0.638692	1.5657	0.851745	0.00500037	0.000732991	0.357041	0.835116	0.990396	0.241646	8.52212e-23	3.50198e-33	0.222005
FC-MZUSP	Brycon falcatus	95948	1334.19	349.521	0.677345	1.47635	0.866457	0.00488546	0.000596343	0.442103	0.811278	0.992742	0.122097	1.29099e-23	1.33212e-33	0.219864
FC-MZUSP	Brycon falcatus	96263	1345.36	350.094	0.66833	1.49627	0.855542	0.00486947	0.000591169	0.409736	0.811278	0.991986	0.131069	3.01281e-23	2.98528e-33	0.222467
FC-MZUSP	Brycon falcatus	96817	1352.23	351.1	0.665363	1.50294	0.877427	0.00484161	0.000581485	0.404839	0.857148	0.990863	0.154929	6.90208e-23	5.40094e-33	0.210743
FC-MZUSP	Brycon falcatus	13235	923.279	129.813	0.195105	5.12545	0.701304	0.0354175	0.176749	0.568074	0.896038	0.989186	0.0853634	2.06004e-18	4.13665e-27	1.06921
FC-MZUSP	Brycon falcatus	54125	1242.06	262.515	0.440885	2.26816	0.767916	0.00866051	0.00692223	0.439642	0.942163	0.989679	0.105781	-1.0424e-20	8.5199e-31	0.209273
FC-MZUSP	Brycon falcatus	54253	1435.84	262.825	0.330691	3.02397	0.825153	0.00864008	0.00755395	0.439294	0.965202	0.99167	0.0698914	-9.50417e-20	-6.92708e-30	0.228027
FC-MZUSP	Brycon falcatus	66993	1223.53	292.058	0.562355	1.77824	0.959428	0.006997	0.00323154	0.351819	0.928362	0.989323	0.0581203	-4.11011e-21	-1.88598e-32	0.208095
FC-MZUSP	Brycon falcatus	84931	1402.27	328.843	0.542763	1.84242	0.828619	0.00551919	0.0013811	0.324216	0.78556	0.989828	0.192289	1.78199e-21	2.14675e-31	0.228326
FC-MZUSP	Brycon falcatus	89055	2321.95	336.732	0.20757	4.81766	0.805104	0.0052636	0.00122698	0.292901	0.942163	0.986211	0.258847	1.11941e-22	3.97671e-32	0.235795
FC-MZUSP	Brycon falcatus	90642	1422.78	339.719	0.562686	1.77719	0.823008	0.00517144	0.000972068	0.267175	0.857148	0.988762	0.266475	1.25416e-24	6.22407e-34	0.225688
FC-MZUSP	Brycon falcatus	91418	1360.82	341.17	0.620356	1.61198	0.842159	0.00512755	0.000898966	0.350046	0.896038	0.990283	0.195363	5.05092e-22	6.98085e-32	0.226759
FC-MZUSP	Brycon falcatus	93081	1366.33	344.259	0.626553	1.59603	0.81219	0.00503594	0.000823792	0.354889	0.877437	0.989363	0.20142	1.6464e-22	3.82537e-32	0.241456
FC-MZUSP	Brycon falcatus	93103	1412.62	344.3	0.586306	1.70559	0.834324	0.00503475	0.000873009	0.382531	0.811278	0.989121	0.213049	4.90086e-22	7.40115e-32	0.222464
FC-MZUSP	Brycon falcatus	93705	1394.13	345.411	0.60585	1.65057	0.812311	0.0050024	0.000879681	0.31631	0.811278	0.987484	0.220643	5.34183e-22	1.77847e-31	0.237996
FC-MZUSP	Brycon falcatus	95002	1357.76	347.793	0.64758	1.54421	0.829335	0.00493411	0.000651637	0.349353	0.811278	0.991759	0.148972	5.47166e-23	1.56303e-32	0.237257
FC-MZUSP	Brycon falcatus	97567	1380.77	352.457	0.643088	1.555	0.815185	0.00480439	0.000504398	0.360763	0.835116	0.991971	0.126525	4.48284e-25	5.68229e-34	0.243672
FC-MZUSP	Brycon falcatus	26948	955.238	185.233	0.371119	2.69455	0.892702	0.0173946	0.0358598	0.500229	0.896038	0.991797	0.0547786	-7.3057e-19	-2.1496e-28	0.493371
FC-MZUSP	Brycon falcatus	87068	1953.75	332.954	0.286635	3.48876	0.866805	0.00538372	0.00113332	0.32872	0.811278	0.992283	0.130267	2.06045e-22	1.45751e-32	0.217911
FC-MZUSP	Brycon falcatus	87948	2003.07	334.632	0.275451	3.63041	0.855242	0.00532985	0.00107731	0.302928	0.835116	0.992312	0.132548	2.57511e-22	1.45038e-32	0.217147
FC-MZUSP	Brycon falcatus	89655	1309.42	337.864	0.657091	1.52186	0.868043	0.00522838	0.000956773	0.333438	0.835116	0.993394	0.119774	9.5675e-23	9.18313e-33	0.222959
FC-MZUSP	Brycon falcatus	23849	938.066	174.257	0.340575	2.93621	0.891685	0.0196549	0.0521714	0.556366	0.857148	0.993364	0.0573434	-1.6657e-18	-1.26815e-27	0.507884
FC-MZUSP	Brycon falcatus	24879	956.066	177.98	0.342032	2.9237	0.878341	0.0188412	0.0438166	0.518092	0.835116	0.992746	0.0493233	-1.34406e-18	-1.38859e-27	0.519804
FC-MZUSP	Brycon falcatus	34762	1078.52	210.381	0.375544	2.6628	0.807817	0.0134846	0.0103653	0.31723	0.835116	0.990325	0.247419	1.13758e-21	3.90035e-32	0.455652
FC-MZUSP	Brycon ferox	59166	1203.14	274.468	0.513626	1.94694	0.893314	0.00792262	0.00507436	0.389975	0.954434	0.993873	0.0534754	-5.25419e-21	-1.32391e-31	0.229418
FC-MZUSP	Brycon ferox	83112	1902.99	325.302	0.288403	3.46737	0.821882	0.00563998	0.00148785	0.307861	0.835116	0.99141	0.183467	1.29019e-21	5.9881e-32	0.224454
FC-MZUSP	Brycon ferox	84612	2071.05	328.225	0.247891	4.03404	0.815891	0.00553999	0.00142409	0.35409	0.78556	0.9916	0.155597	1.30853e-21	1.74655e-31	0.230189
FC-MZUSP	Brycon ferox	90251	1324.98	338.985	0.646018	1.54794	0.860115	0.00519385	0.000926279	0.349665	0.78556	0.991691	0.13406	1.26114e-22	1.21216e-32	0.227565
FC-MZUSP	Brycon ferox	19926	947.078	159.281	0.279163	3.58213	0.825127	0.0235245	0.0742346	0.542656	0.954434	0.991224	0.065447	-2.95495e-18	-4.22036e-27	0.612635
FC-MZUSP	Brycon ferox	98888	1368.39	354.835	0.66364	1.50684	0.861792	0.00474021	0.000459272	0.290328	0.877437	0.992108	0.119657	9.94558e-23	1.07422e-32	0.221321
FC-MZUSP	Brycon ferox	96102	1338.84	349.801	0.673733	1.48427	0.891501	0.00487763	0.000626493	0.298958	0.835116	0.989407	0.172999	6.47216e-24	1.69203e-33	0.213582
FC-MZUSP	Brycon ferox	47904	1440.54	246.968	0.290088	3.44723	0.795933	0.0097852	0.0114054	0.506729	0.857148	0.994381	0.0571429	-4.91536e-19	-1.44035e-28	0.265138
FC-MZUSP	Brycon ferox	87151	1423.13	333.113	0.540748	1.84929	0.884719	0.0053786	0.00140261	0.31875	0.835116	0.986717	0.45716	1.24865e-22	9.53553e-33	0.207084
FC-MZUSP	Brycon ferox	95404	1357.49	348.529	0.650586	1.53708	0.900089	0.00491332	0.000785044	0.427927	0.835116	0.984672	0.3032	9.35207e-24	9.61585e-34	0.207376
FC-MZUSP	Brycon ferox	96668	1332.33	350.83	0.684332	1.46128	0.892158	0.00484907	0.00063052	0.449307	0.835116	0.987926	0.224094	1.57887e-23	1.79139e-33	0.212047
FC-MZUSP	Brycon ferox	1189	158.083	38.9086	0.597888	1.67255	0.931818	0.394239	17.8837	0.504111	0.896038	0.991483	0.0956057	-3.19441e-20	2.36263e-28	0.240343
FC-MZUSP	Brycon ferox	17913	971.321	151.022	0.23859	4.19129	0.709819	0.0261681	0.0953982	0.569487	0.757878	0.991206	0.0874687	2.50867e-19	2.31385e-28	0.710758
FC-MZUSP	Brycon ferox	40799	1117.53	227.919	0.410527	2.43589	0.749197	0.0114893	0.00526947	0.351875	0.78556	0.992118	0.136892	5.35463e-22	7.2794e-32	0.411579
FC-MZUSP	Brycon ferox	42455	1141.14	232.498	0.409692	2.44086	0.756544	0.0110411	0.00648764	0.376739	0.78556	0.989186	0.217652	1.50763e-21	7.49056e-31	0.389729
FC-MZUSP	Brycon ferox	42852	1081.24	233.583	0.46061	2.17104	0.844092	0.0109388	0.00511304	0.386661	0.835116	0.99056	0.201629	1.25663e-22	1.91941e-32	0.357962
FC-MZUSP	Brycon hilarii	45009	1137.61	239.389	0.43704	2.28812	0.751603	0.0104146	0.00399102	0.387735	0.835116	0.990996	0.165923	3.99561e-22	8.08397e-32	0.375225
FC-MZUSP	Brycon hilarii	86464	2026.92	331.797	0.264468	3.78117	0.808301	0.00542133	0.00130268	0.375865	0.877437	0.989971	0.200727	5.89557e-22	1.33819e-31	0.227099
FC-MZUSP	Brycon hilarii	87456	2056.35	333.695	0.2599	3.84763	0.838939	0.00535984	0.00122326	0.331681	0.835116	0.990567	0.176349	6.8933e-22	7.04656e-32	0.219375
FC-MZUSP	Brycon hilarii	87685	2036.59	334.132	0.265661	3.76419	0.80601	0.00534584	0.0011979	0.380465	0.78556	0.98908	0.218312	2.56982e-22	4.75282e-32	0.22705
FC-MZUSP	Brycon hilarii	91008	2155.82	340.404	0.246073	4.06383	0.834209	0.00515065	0.000953094	0.415181	0.835116	0.992926	0.12127	7.23268e-23	7.77558e-33	0.228222
FC-MZUSP	Brycon hilarii	93178	1388.66	344.439	0.6072	1.6469	0.86825	0.00503069	0.000841479	0.4185	0.835116	0.992121	0.145505	7.20674e-23	7.61879e-33	0.219267
FC-MZUSP	Brycon hilarii	95917	1314.63	349.464	0.697422	1.43385	0.911767	0.00488704	0.000690646	0.388852	0.757878	0.98742	0.255313	-2.38683e-24	1.05967e-34	0.209846
FC-MZUSP	Brycon hilarii	101943	1358.17	360.275	0.694482	1.43992	0.863134	0.00459816	0.000349324	0.438898	0.912999	0.992725	0.101404	9.87719e-24	3.68883e-33	0.22232
FC-MZUSP	Brycon hilarii	96816	1347.42	351.098	0.670116	1.49228	0.854638	0.00484166	0.000571376	0.381034	0.835116	0.992977	0.114879	1.78057e-24	1.11748e-33	0.224682
FC-MZUSP	Brycon hilarii	1447	169.154	42.9229	0.635495	1.57358	0.934151	0.323946	17.7612	0.667443	0.928362	0.988618	0.0778112	3.51569e-16	-5.38613e-25	0.222791
FC-MZUSP	Brycon hilarii	1469	164.569	43.248	0.681613	1.46711	0.980641	0.319095	15.4347	0.606659	0.896038	0.988321	0.0808688	3.97015e-18	-1.7375e-26	0.20816
FC-MZUSP	Brycon hilarii	1625	176.569	45.4864	0.654993	1.52673	0.944767	0.288462	13.3666	0.637372	0.928362	0.990046	0.0591646	1.41013e-16	-7.25854e-25	0.212528
FC-MZUSP	Brycon hilarii	39845	988.867	225.238	0.512045	1.95295	0.902962	0.0117643	0.0198368	0.575885	0.942163	0.98557	0.0837845	3.79036e-20	1.02742e-27	0.275174
FC-MZUSP	Brycon hilarii	95840	2424.96	349.324	0.204809	4.88261	0.810555	0.00489096	0.000705523	0.379314	0.877437	0.987176	0.22599	2.57201e-22	7.14508e-32	0.233459
FC-MZUSP	Brycon hilarii	96463	1374.91	350.458	0.641241	1.55948	0.806803	0.00485938	0.000526198	0.44874	0.877437	0.992626	0.126892	5.00521e-24	5.22518e-33	0.246844
FC-MZUSP	Brycon hilarii	100674	1346.79	358.025	0.697469	1.43376	0.858458	0.00465612	0.000391522	0.461109	0.78556	0.992006	0.0996742	-2.06919e-24	1.47156e-33	0.222394
FC-MZUSP	Brycon hilarii	101380	1329.81	359.278	0.72042	1.38808	0.877149	0.00462369	0.000429399	0.504817	0.835116	0.989062	0.187018	-7.78479e-24	2.68813e-34	0.214952
FC-MZUSP	Brycon insignis	102407	1344.59	361.094	0.7118	1.40489	0.882309	0.00457732	0.000376142	0.461609	0.835116	0.990496	0.143292	-2.02363e-26	8.26645e-34	0.214122
FC-MZUSP	Brycon insignis	104083	1328.63	364.037	0.740932	1.34965	0.890481	0.00450362	0.000409352	0.46305	0.877437	0.990093	0.156274	1.50711e-24	1.14725e-33	0.206102
FC-MZUSP	Brycon insignis	91316	1943.32	340.98	0.303857	3.29102	0.862236	0.00513327	0.000919119	0.382528	0.78556	0.990432	0.201395	1.49852e-22	1.60978e-32	0.207296
FC-MZUSP	Brycon insignis	94387	1363.24	346.666	0.638226	1.56684	0.838764	0.00496626	0.000741724	0.410872	0.857148	0.989768	0.210017	3.3384e-23	5.11317e-33	0.228537
FC-MZUSP	Brycon insignis	98643	1349.09	354.395	0.681079	1.46826	0.884976	0.00475198	0.000639736	0.393554	0.835116	0.986998	0.236901	2.97305e-23	5.0478e-33	0.206671
FC-MZUSP	Brycon insignis	34607	1043.91	209.912	0.399071	2.50582	0.802853	0.0135449	0.0176944	0.429658	0.942163	0.990283	0.073985	5.17858e-20	1.09125e-28	0.43541
FC-MZUSP	Brycon insignis	91178	1281.85	340.722	0.697312	1.43408	0.895491	0.00514104	0.000849883	0.290159	0.857148	0.991764	0.131512	1.67445e-23	1.86994e-33	0.212908
FC-MZUSP	Brycon insignis	95964	1989.34	349.55	0.304721	3.28169	0.873305	0.00488464	0.000635924	0.388529	0.811278	0.991507	0.175121	3.99821e-23	7.00932e-33	0.209429
FC-MZUSP	Brycon insignis	84769	2030.73	328.529	0.25831	3.87131	0.797068	0.00552973	0.00141255	0.343585	0.835116	0.989057	0.221646	1.66448e-21	5.55617e-31	0.235257
FC-MZUSP	Brycon insignis	90320	2070.67	339.115	0.26471	3.77772	0.844783	0.00518988	0.00102302	0.362264	0.877437	0.988188	0.214678	2.5686e-22	7.24586e-32	0.213698
FC-MZUSP	Brycon insignis	92820	1389.3	343.776	0.604306	1.65479	0.835892	0.0050501	0.000770102	0.354198	0.835116	0.990944	0.157761	5.81393e-23	1.95624e-32	0.233582
FC-MZUSP	Brycon insignis	94183	1385.85	346.291	0.616236	1.62276	0.883352	0.00497701	0.000774137	0.32718	0.835116	0.989495	0.216708	7.9068e-23	5.1099e-33	0.201012
FC-MZUSP	Brycon insignis	95500	1363.29	348.704	0.645712	1.54868	0.855919	0.00490838	0.000724998	0.383594	0.857148	0.988371	0.244478	1.86674e-22	3.15641e-32	0.22156
FC-MZUSP	Brycon insignis	88443	2220.09	335.573	0.225493	4.43473	0.856135	0.00530002	0.00133723	0.348361	0.835116	0.9878	0.249382	3.97871e-22	7.04438e-32	0.205414
FC-MZUSP	Brycon insignis	92773	1333.79	343.689	0.655326	1.52596	0.886948	0.00505266	0.000919151	0.353765	0.835116	0.989699	0.19858	2.46187e-23	2.54273e-33	0.209147
FC-MZUSP	Brycon insignis	81037	1965.18	321.216	0.263688	3.79236	0.802641	0.00578439	0.00177596	0.330792	0.896038	0.989882	0.187853	1.76977e-21	5.99573e-31	0.226598
FC-MZUSP	Brycon melanopterus	16747	961.078	146.024	0.22784	4.38905	0.66267	0.0279901	0.106016	0.546729	0.942163	0.986642	0.0983793	6.96856e-19	1.27278e-26	0.991009
FC-MZUSP	Brycon melanopterus	93651	1330.05	345.312	0.665253	1.50319	0.843817	0.00500529	0.000810282	0.376781	0.696212	0.989096	0.252189	1.71022e-23	4.72179e-33	0.224345
FC-MZUSP	Brycon melanopterus	99720	1376.98	356.325	0.660897	1.51309	0.89358	0.00470066	0.000536708	0.442862	0.78556	0.988545	0.184102	2.16757e-23	2.1149e-33	0.200336
FC-MZUSP	Brycon melanopterus	1027	135.255	36.161	0.705464	1.41751	0.975309	0.456426	27.6897	0.541463	0.857148	0.989843	0.0771429	7.47805e-20	2.17705e-29	0.204383
FC-MZUSP	Brycon melanopterus	87998	2059.06	334.728	0.260823	3.83402	0.819097	0.00532683	0.00116916	0.353828	0.857148	0.989962	0.203317	5.43616e-22	7.57928e-32	0.224729
FC-MZUSP	Brycon melanopterus	30902	995.137	198.357	0.392131	2.55017	0.84243	0.0151689	0.0255189	0.468818	0.877437	0.989828	0.0619549	1.37362e-19	1.22836e-27	0.458836
FC-MZUSP	Brycon melanopterus	50343	1422.4	253.177	0.312684	3.19811	0.786646	0.00931113	0.00958939	0.473406	0.965202	0.991433	0.0581537	-1.19395e-19	-6.74038e-30	0.256218
FC-MZUSP	Brycon melanopterus	61406	1377.53	279.615	0.406648	2.45913	0.859667	0.00763362	0.00461619	0.367459	0.982317	0.988374	0.0702089	-1.03182e-21	2.24359e-31	0.226609
FC-MZUSP	Brycon melanopterus	64459	1319.89	286.482	0.464963	2.15071	0.877841	0.00727206	0.00367345	0.342067	0.954434	0.989845	0.053584	-2.38651e-21	5.38964e-32	0.225914
FC-MZUSP	Brycon melanopterus	65244	1293.14	288.221	0.490294	2.03959	0.880807	0.00718457	0.0035084	0.339058	0.912999	0.991066	0.042122	-5.89333e-21	-1.63237e-31	0.20858
FC-MZUSP	Brycon melanopterus	66643	1542.06	291.295	0.35218	2.83946	0.815983	0.00703375	0.00185288	0.277374	0.928362	0.992203	0.113676	2.91556e-22	5.25932e-32	0.272551
FC-MZUSP	Brycon melanopterus	73668	1532.55	306.263	0.394149	2.53711	0.840441	0.00636301	0.00364015	0.374073	0.999295	0.969633	0.458814	1.58398e-20	3.32758e-30	0.198902
FC-MZUSP	Brycon melanopterus	87502	1339.89	333.783	0.612477	1.63271	0.890669	0.00535702	0.00109742	0.302964	0.835116	0.993412	0.170919	2.41949e-22	9.28278e-33	0.211981
FC-MZUSP	Brycon melanopterus	88648	1338.17	335.962	0.622091	1.60748	0.898384	0.00528777	0.00102959	0.317453	0.835116	0.991976	0.201713	1.20515e-22	4.87451e-33	0.212827
FC-MZUSP	Brycon melanopterus	89012	1374.46	336.651	0.592101	1.6889	0.878723	0.00526614	0.0010589	0.281153	0.835116	0.989952	0.198246	3.74676e-22	1.97885e-32	0.214122
FC-MZUSP	Brycon melanopterus	90231	2062.61	338.948	0.266522	3.75204	0.853951	0.005195	0.000940439	0.245652	0.896038	0.991497	0.152774	2.04473e-22	1.59249e-32	0.21378
FC-MZUSP	Brycon melanopterus	90522	1322.23	339.494	0.650651	1.53692	0.888063	0.0051783	0.000878836	0.2831	0.835116	0.992414	0.13386	3.57915e-23	4.52508e-33	0.214648
FC-MZUSP	Brycon melanopterus	90579	1319.33	339.601	0.653931	1.52921	0.914228	0.00517504	0.000921899	0.310974	0.835116	0.990016	0.200785	1.70942e-23	1.71229e-33	0.198458
FC-MZUSP	Brycon melanopterus	90752	1301.18	339.925	0.673585	1.48459	0.887437	0.00516518	0.000862477	0.287847	0.78556	0.992705	0.125957	4.00473e-23	6.10487e-33	0.214745
FC-MZUSP	Brycon nattereri	90882	1381.87	340.168	0.59807	1.67205	0.878155	0.00515779	0.00101302	0.28191	0.928362	0.988264	0.237811	1.30437e-22	1.76429e-32	0.214924
FC-MZUSP	Brycon nattereri	91252	1344.72	340.86	0.634147	1.57692	0.898406	0.00513687	0.000855375	0.299222	0.835116	0.992216	0.172749	4.25478e-23	4.22865e-33	0.207795
FC-MZUSP	Brycon nattereri	96450	1298.92	350.434	0.71837	1.39204	0.896542	0.00486003	0.000707931	0.398633	0.877437	0.991408	0.184929	7.87522e-24	2.53148e-33	0.206172
FC-MZUSP	Brycon nattereri	97657	1321.85	352.62	0.702345	1.4238	0.875965	0.00479996	0.000603908	0.411574	0.811278	0.991976	0.167669	6.05301e-24	1.12954e-33	0.215323
FC-MZUSP	Brycon nattereri	1140	148.426	38.0985	0.650268	1.53783	0.951586	0.411184	24.9539	0.58341	0.993651	0.984887	0.161504	-5.17245e-18	2.03656e-25	0.223799
FC-MZUSP	Brycon nattereri	103474	1357.92	362.97	0.705164	1.41811	0.876438	0.00453012	0.000396057	0.382202	0.543564	0.989141	0.21391	-1.61456e-23	-6.72951e-34	0.217496
FC-MZUSP	Brycon nattereri	60545	1673.11	277.648	0.271794	3.67926	0.794815	0.00774218	0.00542374	0.399672	0.896038	0.989882	0.0715622	1.33155e-19	2.78481e-28	0.243557
FC-MZUSP	Brycon nattereri	90919	1350.19	340.238	0.626721	1.59561	0.830622	0.00515569	0.000869507	0.279933	0.896038	0.992024	0.112523	2.0849e-22	6.51231e-32	0.230159
FC-MZUSP	Brycon nattereri	90667	2189.48	339.766	0.237672	4.20748	0.835202	0.00517002	0.000952726	0.28872	0.896038	0.991702	0.14472	1.25345e-22	1.46936e-32	0.228144
FC-MZUSP	Brycon nattereri	92911	1341.66	343.945	0.648619	1.54174	0.852301	0.00504515	0.000777808	0.289645	0.835116	0.990569	0.177786	7.93414e-23	1.13672e-32	0.226366
FC-MZUSP	Brycon nattereri	47731	1134.6	246.522	0.465934	2.14622	0.813107	0.00982066	0.0040594	0.360522	0.811278	0.989596	0.214737	-9.06149e-23	6.16978e-32	0.319501
FC-MZUSP	Brycon nattereri	90086	2030.37	338.675	0.27461	3.64153	0.821488	0.00520336	0.00103655	0.337756	0.835116	0.989401	0.224269	9.65502e-23	7.75453e-32	0.217913
FC-MZUSP	Brycon nattereri	91355	1393.43	341.052	0.591252	1.69133	0.891843	0.00513108	0.00100531	0.368483	0.835116	0.988376	0.184018	2.29731e-22	2.93777e-32	0.203626
FC-MZUSP	Brycon nattereri	91819	2080.83	341.918	0.266482	3.7526	0.835227	0.00510515	0.000952774	0.362804	0.835116	0.989231	0.2168	-1.75996e-22	7.3119e-32	0.214478
FC-MZUSP	Brycon nattereri	95809	2191.7	349.268	0.250641	3.98976	0.840563	0.00489255	0.000705861	0.350075	0.835116	0.990432	0.189825	4.56601e-23	7.78402e-33	0.219793
FC-MZUSP	Brycon nattereri	95913	1374.03	349.457	0.638402	1.56641	0.855396	0.00488724	0.000709857	0.352419	0.835116	0.98974	0.229532	6.74762e-23	9.7873e-33	0.221322
FC-MZUSP	Brycon opalinus	96865	2343.04	351.187	0.221726	4.51007	0.854053	0.00483921	0.000726113	0.352671	0.857148	0.989209	0.227494	1.19693e-22	2.24033e-32	0.211628
FC-MZUSP	Brycon opalinus	97864	1341.93	352.993	0.682924	1.46429	0.874192	0.00478981	0.000606193	0.429443	0.625262	0.990784	0.224085	1.86524e-25	3.44372e-35	0.214283
FC-MZUSP	Brycon opalinus	47892	1176.42	246.937	0.434861	2.29958	0.774538	0.00978765	0.00421253	0.33376	0.757878	0.991782	0.153626	-1.51657e-21	2.27588e-31	0.346165
FC-MZUSP	Brycon opalinus	89400	2073.52	337.383	0.261295	3.82709	0.819289	0.00524329	0.00103178	0.312896	0.835116	0.991336	0.163342	4.82699e-22	8.48195e-32	0.221641
FC-MZUSP	Brycon opalinus	94347	1423.43	346.592	0.585149	1.70897	0.861231	0.00496836	0.000779359	0.331197	0.696212	0.989739	0.244428	5.70005e-23	1.66807e-32	0.207641
FC-MZUSP	Brycon opalinus	97433	1365.71	352.215	0.656443	1.52336	0.866865	0.004811	0.000647798	0.331969	0.835116	0.990413	0.185606	4.18507e-23	5.01513e-33	0.209634
FC-MZUSP	Brycon opalinus	97530	1366.23	352.39	0.656597	1.523	0.852371	0.00480621	0.00059252	0.368363	0.835116	0.99041	0.212097	1.52965e-23	1.62482e-33	0.217807
FC-MZUSP	Brycon opalinus	98407	1356.8	353.971	0.671744	1.48866	0.874986	0.00476338	0.000579526	0.362991	0.835116	0.990447	0.184261	1.8239e-23	3.67768e-33	0.213511
FC-MZUSP	Brycon opalinus	99221	1358.48	355.432	0.675632	1.4801	0.871514	0.0047243	0.000496873	0.406496	0.835116	0.992502	0.13685	8.69256e-24	2.04432e-33	0.217505
FC-MZUSP	Brycon opalinus	99283	2116.47	355.543	0.278524	3.59036	0.872664	0.00472135	0.000497491	0.420008	0.78556	0.992894	0.126884	1.5132e-23	2.3922e-33	0.215762
FC-MZUSP	Brycon opalinus	1120	142.083	37.7628	0.697175	1.43436	0.968858	0.418527	26.7566	0.606806	0.928362	0.986831	0.0932164	1.69901e-17	1.63685e-25	0.206241
FC-MZUSP	Brycon opalinus	1144	144.912	38.1652	0.684588	1.46073	0.973617	0.409747	25.6042	0.609177	0.857148	0.989248	0.0811278	1.29882e-17	9.52965e-26	0.210341
FC-MZUSP	Brycon opalinus	88011	2101.16	334.752	0.250512	3.99182	0.819118	0.00532604	0.00116357	0.31516	0.835116	0.990751	0.185063	6.69687e-22	9.34355e-32	0.227707
FC-MZUSP	Brycon opalinus	93441	1374.64	344.924	0.621396	1.60928	0.834175	0.00501653	0.000864828	0.378713	0.811278	0.990517	0.200794	5.68218e-24	2.51605e-33	0.223372
FC-MZUSP	Brycon opalinus	98272	2265.54	353.728	0.2406	4.15628	0.844835	0.00476992	0.000576985	0.369149	0.835116	0.990081	0.213208	2.04611e-23	7.78695e-33	0.223962
FC-MZUSP	Brycon orbignyanus	1044	135.255	36.459	0.717141	1.39443	0.975701	0.448994	28.8728	0.579294	0.896038	0.99269	0.0706767	-2.26625e-19	5.50304e-29	0.201469
FC-MZUSP	Brycon orbignyanus	1052	140.083	36.5985	0.673679	1.48439	0.946043	0.44558	30.4302	0.614453	0.877437	0.989568	0.0987302	5.98107e-19	1.94537e-27	0.212968
FC-MZUSP	Brycon orbignyanus	19927	692.576	159.285	0.522056	1.9155	0.9191	0.0235234	0.0339833	0.332229	0.857148	0.987997	0.237176	1.16248e-20	3.59221e-30	0.172971
FC-MZUSP	Brycon orbignyanus	43431	1186.2	235.155	0.387878	2.57813	0.770162	0.010793	0.0061861	0.362922	0.835116	0.988381	0.246015	1.12793e-21	7.08901e-31	0.377471
FC-MZUSP	Brycon orbignyanus	44530	1137.57	238.112	0.43242	2.31257	0.789945	0.0105266	0.00508936	0.38655	0.835116	0.988081	0.282515	2.02756e-22	1.07892e-31	0.357764
FC-MZUSP	Brycon orbignyanus	81261	2085.6	321.659	0.234763	4.25962	0.807988	0.00576845	0.00191385	0.349424	0.857148	0.985951	0.284979	9.20469e-22	8.07489e-31	0.219889
FC-MZUSP	Brycon orbignyanus	83023	2490.98	325.128	0.168138	5.94748	0.805634	0.00564603	0.00193472	0.341241	0.896038	0.986014	0.296349	6.48812e-21	2.68099e-30	0.218769
FC-MZUSP	Brycon orbignyanus	83067	2092.96	325.214	0.238296	4.19645	0.809651	0.00564304	0.00167344	0.358679	0.835116	0.987502	0.266909	8.69841e-22	2.79951e-31	0.219642
FC-MZUSP	Brycon orbignyanus	83362	2019.16	325.791	0.256943	3.89191	0.802229	0.00562307	0.00155491	0.327624	0.835116	0.98956	0.218354	1.05226e-21	1.96306e-31	0.230469
FC-MZUSP	Brycon orbignyanus	84207	2069.95	327.438	0.246968	4.04911	0.795825	0.00556664	0.00151069	0.373455	0.835116	0.988897	0.215305	4.73104e-22	3.11502e-31	0.23072
FC-MZUSP	Brycon orbignyanus	84320	2002.97	327.658	0.264113	3.78626	0.805149	0.00555918	0.00151646	0.375691	0.835116	0.98896	0.251621	6.23806e-23	1.48348e-31	0.223582
FC-MZUSP	Brycon orbignyanus	85536	2105.99	330.012	0.242352	4.12622	0.800397	0.00548015	0.00142046	0.360008	0.835116	0.987364	0.278287	1.20056e-21	3.06088e-31	0.234315
FC-MZUSP	Brycon orbignyanus	90941	2158.1	340.279	0.245372	4.07545	0.814971	0.00515444	0.000937797	0.351818	0.78556	0.989213	0.208847	-2.777e-22	7.57516e-32	0.223562
FC-MZUSP	Brycon orbignyanus	94832	2137.64	347.482	0.260794	3.83445	0.844077	0.00494295	0.000651027	0.309902	0.835116	0.991547	0.137911	1.55128e-22	1.77346e-32	0.2266
FC-MZUSP	Brycon orthotaenia	96101	1393.16	349.799	0.622207	1.60718	0.842932	0.00487768	0.000662218	0.306759	0.811278	0.991227	0.191788	1.96161e-22	3.96437e-32	0.228879
FC-MZUSP	Brycon orthotaenia	98347	1403.76	353.863	0.627166	1.59447	0.829575	0.00476629	0.000537417	0.32579	0.857148	0.990176	0.188471	9.20201e-23	1.57957e-32	0.234501
FC-MZUSP	Brycon orthotaenia	100885	1345.62	358.4	0.700148	1.42827	0.876369	0.00464638	0.000415547	0.435813	0.811278	0.993034	0.109741	4.43854e-25	1.1292e-33	0.21859
FC-MZUSP	Brycon orthotaenia	8140	645.439	101.805	0.245541	4.07264	0.79129	0.057586	0.515044	0.617396	0.896038	0.990084	0.0659983	3.2712e-17	1.7366e-25	0.729692
FC-MZUSP	Brycon orthotaenia	19696	960.693	158.359	0.268175	3.72891	0.750638	0.0237992	0.075465	0.542713	0.877437	0.988239	0.0838429	-3.75228e-19	1.37799e-27	0.759444
FC-MZUSP	Brycon orthotaenia	66836	1650.26	291.716	0.308399	3.24255	0.843356	0.00701344	0.0037125	0.368414	0.857148	0.988158	0.0857644	-3.53376e-21	2.31646e-30	0.218055
FC-MZUSP	Brycon orthotaenia	84779	1371.46	328.548	0.566409	1.76551	0.821916	0.00552908	0.0013876	0.286024	0.928362	0.991257	0.131713	5.92762e-22	1.96129e-31	0.243361
FC-MZUSP	Brycon orthotaenia	91883	1350.03	342.037	0.633515	1.57849	0.852568	0.0051016	0.000947516	0.385697	0.811278	0.990897	0.19122	9.4292e-23	1.84804e-32	0.225394
FC-MZUSP	Brycon orthotaenia	97176	1366.37	351.75	0.654078	1.52887	0.850042	0.00482372	0.000634484	0.413665	0.811278	0.990963	0.18284	1.54809e-23	5.64355e-33	0.224802
FC-MZUSP	Brycon orthotaenia	13631	483.037	131.74	0.734138	1.36214	0.973573	0.0343885	0.0836615	0.358865	0.928362	0.991521	0.22381	1.36925e-20	1.30858e-30	0.166074
FC-MZUSP	Brycon orthotaenia	16621	551.019	145.473	0.687913	1.45367	0.96735	0.0282023	0.0482514	0.321163	0.857148	0.987406	0.262632	1.02302e-20	1.4672e-30	0.187655
FC-MZUSP	Brycon orthotaenia	18322	607.22	152.736	0.624439	1.60144	0.931848	0.025584	0.0469856	0.346355	0.857148	0.98614	0.296274	9.25173e-21	3.96188e-30	0.209199
FC-MZUSP	Brycon orthotaenia	38824	1119.57	222.334	0.389231	2.56917	0.775379	0.0120737	0.00973562	0.338427	0.835116	0.988714	0.224219	7.65109e-21	2.65654e-30	0.444494
FC-MZUSP	Brycon orthotaenia	43178	1075.4	234.469	0.469169	2.13143	0.887906	0.0108562	0.00705959	0.359895	0.835116	0.990537	0.198271	-4.19912e-21	1.192e-31	0.354434
FC-MZUSP	Brycon orthotaenia	55330	1184.42	265.421	0.495635	2.01761	0.882653	0.0084719	0.00647239	0.42627	0.857148	0.994094	0.0379616	-2.44025e-20	-9.74264e-31	0.231532
FC-MZUSP	Brycon orthotaenia	55609	1113.12	266.089	0.56399	1.77308	0.923461	0.00842939	0.00621201	0.410572	0.942163	0.993422	0.0449624	-4.90476e-21	-3.10367e-32	0.234544
FC-MZUSP	Brycon orthotaenia	60191	1315.57	276.835	0.437032	2.28816	0.837335	0.00778771	0.00504582	0.414666	0.835116	0.990982	0.059457	-1.61314e-19	-2.06932e-29	0.220598
FC-MZUSP	Brycon whitei	61442	1193.35	279.697	0.542179	1.84441	0.894535	0.00762915	0.00439912	0.385214	0.974489	0.993395	0.0421805	-1.81531e-20	-7.93214e-31	0.215695
FC-MZUSP	Brycon whitei	62440	1226.8	281.959	0.521344	1.91812	0.885624	0.00750721	0.00415095	0.36946	0.835116	0.994096	0.0386132	-2.55451e-20	-1.22109e-30	0.217781
FC-MZUSP	Brycon whitei	75867	1925.03	310.8	0.257268	3.88699	0.748365	0.00617858	0.00212946	0.340077	0.928362	0.991826	0.166792	3.53576e-21	5.22206e-31	0.288364
FC-MZUSP	Brycon whitei	78330	1844.49	315.805	0.289325	3.45632	0.799669	0.0059843	0.00195265	0.326896	0.835116	0.992533	0.191378	1.52243e-21	8.73699e-32	0.260236
FC-MZUSP	Brycon whitei	79007	1753.19	317.167	0.32301	3.09588	0.794887	0.00593302	0.00174765	0.317213	0.912999	0.992361	0.172824	1.40621e-21	9.1035e-32	0.262466
FC-MZUSP	Brycon whitei	84114	2008.69	327.257	0.26197	3.81723	0.864428	0.00557279	0.00145896	0.303686	0.928362	0.99103	0.189708	5.17032e-22	4.14537e-32	0.227853
FC-MZUSP	Brycon whitei	64558	1476.18	286.702	0.37229	2.68608	0.746586	0.00726091	0.00247553	0.29646	0.835116	0.987333	0.225781	5.54501e-21	8.84341e-31	0.281349
FC-MZUSP	Brycon whitei	78737	2063.56	316.624	0.232356	4.30374	0.793392	0.00595336	0.00214548	0.319461	0.954434	0.986676	0.253968	7.8067e-21	2.12561e-30	0.235336
FC-MZUSP	Brycon whitei	85161	2130.39	329.288	0.235794	4.24099	0.80147	0.00550428	0.00140807	0.292547	0.928362	0.988593	0.25518	2.29365e-21	4.18223e-31	0.238474
FC-MZUSP	Brycon whitei	87926	1941.8	334.591	0.293033	3.41258	0.83854	0.00533119	0.00114502	0.362582	0.835116	0.98905	0.235163	-1.24379e-22	1.71969e-32	0.22157
FC-MZUSP	Brycon whitei	88206	2012.43	335.123	0.273695	3.65371	0.840698	0.00531426	0.00114669	0.326372	0.835116	0.989296	0.222782	4.82676e-22	8.16414e-32	0.221384
FC-MZUSP	Caenotropus labyrinthicus	93172	1390.76	344.427	0.605329	1.652	0.830817	0.00503102	0.000827135	0.370833	0.877437	0.989992	0.186282	1.92599e-22	5.24254e-32	0.234841
FC-MZUSP	Caenotropus labyrinthicus	89019	2160.59	336.664	0.239634	4.17304	0.784516	0.00526573	0.00103125	0.324033	0.912999	0.991442	0.207694	3.20034e-22	8.64064e-32	0.246631
FC-MZUSP	Caenotropus labyrinthicus	1494	190.527	43.6144	0.517187	1.93354	0.97013	0.313755	9.43754	0.428755	0.896038	0.993799	0.0384545	1.18019e-18	1.44654e-27	0.321092
FC-MZUSP	Caenotropus labyrinthicus	22094	609.404	167.723	0.747607	1.3376	0.96434	0.0212162	0.0185635	0.296285	0.835116	0.988444	0.208262	7.78179e-22	1.30251e-31	0.17417
FC-MZUSP	Caenotropus labyrinthicus	43500	1080.89	235.342	0.467878	2.13731	0.838166	0.0107759	0.0105837	0.420811	0.877437	0.991396	0.0804762	-3.5098e-20	1.52212e-30	0.352687
FC-MZUSP	Caenotropus labyrinthicus	47150	1085.22	245.017	0.503102	1.98767	0.911358	0.00994168	0.00511775	0.27905	0.942163	0.994126	0.0958814	1.75015e-24	2.56613e-34	0.315789
FC-MZUSP	Caenotropus labyrinthicus	51118	1088.71	255.119	0.541949	1.84519	0.919868	0.00916996	0.00688598	0.420643	0.811278	0.994059	0.0572932	-5.3056e-21	3.71996e-31	0.294356
FC-MZUSP	Caenotropus labyrinthicus	54094	1465.51	262.44	0.316505	3.15951	0.837239	0.00866547	0.0078509	0.459235	0.877437	0.991839	0.0689056	-4.69045e-20	-4.25753e-30	0.236015
FC-MZUSP	Caenotropus labyrinthicus	59456	1391.1	275.139	0.386089	2.59008	0.841926	0.00788398	0.00541855	0.407519	0.835116	0.993128	0.0548789	2.16682e-20	8.15942e-30	0.228899
FC-MZUSP	Caenotropus labyrinthicus	59531	1309.69	275.313	0.436131	2.29289	0.82903	0.00787405	0.00519191	0.393945	0.857148	0.993336	0.047853	-1.39439e-20	-6.52549e-31	0.218525
FC-MZUSP	Caenotropus labyrinthicus	64112	1501.39	285.71	0.357408	2.79792	0.781749	0.00731142	0.00249842	0.287419	0.965202	0.990938	0.13736	2.92418e-21	6.1877e-31	0.289394
FC-MZUSP	Caenotropus labyrinthicus	65929	1414.2	289.73	0.414253	2.41398	0.813205	0.00710992	0.00230729	0.306528	0.912999	0.991851	0.15802	1.55194e-21	1.31328e-31	0.275358
FC-MZUSP	Caenotropus labyrinthicus	66011	1449.2	289.91	0.394973	2.53182	0.806034	0.00710109	0.0019266	0.285949	0.928362	0.993212	0.102815	4.31118e-22	3.81994e-32	0.281445
FC-MZUSP	Caenotropus labyrinthicus	70341	1514.89	299.267	0.385173	2.59624	0.803934	0.00666397	0.00191243	0.285707	0.928362	0.986902	0.32594	3.92128e-22	7.84003e-32	0.26318
FC-MZUSP	Caenotropus labyrinthicus	81616	2100.73	322.361	0.232404	4.30285	0.821798	0.00574336	0.00184312	0.315023	0.835116	0.988553	0.318045	3.86838e-21	3.08586e-31	0.218744
FC-MZUSP	Chilodus punctatus	84407	1908.51	327.827	0.291206	3.43399	0.84472	0.00555345	0.00139635	0.313688	0.835116	0.991499	0.187878	4.45473e-22	2.72434e-32	0.20912
FC-MZUSP	Chilodus punctatus	85320	2043.84	329.595	0.256666	3.89612	0.896529	0.00549402	0.00136281	0.279367	0.928362	0.991866	0.188254	8.01068e-24	8.71402e-34	0.207528
FC-MZUSP	Chilodus punctatus	41637	1179.04	230.247	0.376383	2.65687	0.724588	0.011258	0.00636501	0.329622	0.835116	0.988777	0.260217	1.83048e-21	5.03992e-31	0.40321
FC-MZUSP	Chilodus punctatus	45819	1090.7	241.534	0.483999	2.06612	0.854402	0.0102305	0.00496911	0.407387	0.835116	0.985733	0.29949	-4.7205e-22	3.9946e-32	0.330254
FC-MZUSP	Chilodus punctatus	1150	155.598	38.2652	0.596898	1.67533	0.965575	0.407609	22.1958	0.548348	0.942163	0.993236	0.0817962	1.01966e-17	7.78279e-27	0.249927
FC-MZUSP	Chilodus punctatus	41125	1031.82	228.827	0.485406	2.06013	0.916578	0.0113982	0.012671	0.438813	0.877437	0.993938	0.0466165	-1.56389e-19	2.46062e-29	0.342117
FC-MZUSP	Chilodus punctatus	85913	2009.82	330.738	0.267272	3.7415	0.845276	0.0054561	0.00133066	0.318122	0.835116	0.989377	0.207235	5.08775e-22	8.48889e-32	0.207618
FC-MZUSP	Chilodus punctatus	86034	1336.96	330.971	0.604843	1.65332	0.918225	0.00544843	0.00125446	0.286342	0.928362	0.992488	0.12924	4.47489e-23	2.79221e-33	0.212532
FC-MZUSP	Chilodus punctatus	87676	1365.43	334.115	0.590953	1.69218	0.889823	0.00534639	0.00119419	0.352302	0.877437	0.990703	0.2068	-8.89761e-23	1.15408e-32	0.19563
FC-MZUSP	Chilodus punctatus	88551	1902.83	335.778	0.307328	3.25385	0.867501	0.00529356	0.00123118	0.388001	0.78556	0.988571	0.273793	-2.52827e-22	1.42906e-32	0.197242
FC-MZUSP	Chilodus punctatus	46269	1203.51	242.717	0.40142	2.49115	0.726746	0.010131	0.00355423	0.301901	0.835116	0.988367	0.176759	1.70015e-21	3.31841e-31	0.389834
FC-MZUSP	Chilodus punctatus	96424	2405.93	350.387	0.209329	4.77717	0.835382	0.00486134	0.000723729	0.274589	0.835116	0.99078	0.150301	7.61426e-22	7.87965e-32	0.223828
FC-MZUSP	Chilodus punctatus	97140	2266.96	351.685	0.237531	4.20997	0.832655	0.00482551	0.000659255	0.305941	0.835116	0.990091	0.168881	9.50964e-22	1.12987e-31	0.221348
FC-MZUSP	Chilodus punctatus	65397	1608.1	288.559	0.317792	3.14671	0.878484	0.00716776	0.00425118	0.38036	0.993651	0.986025	0.1165	-5.29957e-21	-6.10786e-31	0.217916
FC-MZUSP	Chilodus punctatus	90549	1324.11	339.545	0.649003	1.54082	0.83443	0.00517676	0.000882404	0.308691	0.857148	0.991517	0.165088	1.34046e-22	1.53195e-32	0.234287
FC-MZUSP	Chilodus punctatus	92853	1337.75	343.837	0.652015	1.53371	0.898007	0.0050483	0.000813581	0.374528	0.835116	0.991301	0.146207	3.3419e-23	3.3855e-33	0.208716
FC-MZUSP	Chilodus punctatus	22668	991.321	169.888	0.289864	3.44989	0.725864	0.0206789	0.0556735	0.53128	0.857148	0.992541	0.057218	-3.71237e-18	-2.47087e-27	0.653368
FC-MZUSP	Chilodus punctatus	29653	1010.01	194.307	0.365283	2.7376	0.831875	0.0158078	0.02487	0.427614	0.974489	0.989076	0.0815789	1.79941e-20	1.6792e-28	0.476987
FC-MZUSP	Chilodus punctatus	86071	1309.61	331.042	0.630646	1.58567	0.828458	0.00544609	0.00115174	0.385089	0.857148	0.993902	0.113509	8.41675e-24	3.04058e-33	0.240525
FC-MZUSP	Chilodus punctatus	89547	1332.39	337.661	0.633865	1.57762	0.84783	0.00523468	0.000915503	0.298785	0.835116	0.992778	0.13203	4.36381e-23	1.07218e-32	0.23225
FC-MZUSP	Chilodus punctatus	89790	1305.46	338.119	0.662077	1.5104	0.879354	0.00522051	0.000862535	0.390769	0.835116	0.993305	0.105054	5.57329e-24	1.30033e-33	0.223161
FC-MZUSP	Chilodus punctatus	90551	1311.61	339.548	0.66145	1.51183	0.866235	0.00517664	0.000855407	0.355345	0.835116	0.993034	0.116307	3.58307e-24	9.97228e-34	0.225131
FC-MZUSP	Chilodus punctatus	92021	1315.19	342.293	0.668533	1.49581	0.919906	0.00509395	0.00082679	0.31267	0.857148	0.990672	0.175497	1.82765e-23	2.01377e-33	0.204194
FC-MZUSP	Chilodus punctatus	92026	1285.14	342.303	0.700191	1.42818	0.917069	0.00509367	0.000788109	0.36768	0.835116	0.990694	0.169348	7.36326e-24	8.76001e-34	0.202834
FC-MZUSP	Chloroscombrus chrysurus	92714	1339.06	343.58	0.649762	1.53902	0.858304	0.00505587	0.000791177	0.29374	0.835116	0.990625	0.158079	6.20071e-23	1.67497e-32	0.224393
FC-MZUSP	Chloroscombrus chrysurus	93030	1332.88	344.165	0.65804	1.51966	0.867404	0.0050387	0.000718095	0.314971	0.811278	0.99297	0.125815	1.36866e-23	2.48747e-33	0.222241
FC-MZUSP	Chloroscombrus chrysurus	93919	1313.19	345.805	0.684401	1.46113	0.911844	0.004991	0.000783775	0.337848	0.835116	0.990007	0.189039	3.81123e-23	4.20774e-33	0.205627
FC-MZUSP	Chloroscombrus chrysurus	1069	172.77	36.893	0.450042	2.22201	0.865587	0.438494	22.2078	0.490421	0.757878	0.992713	0.0648622	1.29285e-19	1.10904e-27	0.414369
FC-MZUSP	Chloroscombrus chrysurus	42762	976.049	233.337	0.564059	1.77286	0.954935	0.0109618	0.00600987	0.294897	0.928362	0.991469	0.183066	4.60561e-23	7.42154e-33	0.289949
FC-MZUSP	Chloroscombrus chrysurus	59524	1462.98	275.297	0.34948	2.86139	0.827354	0.00787497	0.00541287	0.401334	0.877437	0.991649	0.0674854	3.13395e-21	5.99844e-30	0.246036
FC-MZUSP	Chloroscombrus chrysurus	66890	1951.96	291.834	0.220611	4.53286	0.847728	0.00700777	0.00424504	0.39586	0.877437	0.987734	0.121729	-1.56813e-20	-3.84194e-31	0.226332
FC-MZUSP	Chloroscombrus chrysurus	82740	1475.24	324.573	0.477746	2.09316	0.845122	0.00566534	0.00162912	0.311903	0.835116	0.991031	0.227561	1.15816e-21	1.16253e-31	0.216106
FC-MZUSP	Chloroscombrus chrysurus	84092	1379.29	327.214	0.555464	1.8003	0.840021	0.00557425	0.00166946	0.307743	0.928362	0.990216	0.204035	9.1316e-22	1.44144e-31	0.223323
FC-MZUSP	Chloroscombrus chrysurus	87765	2080.23	334.284	0.254864	3.92366	0.850939	0.00534097	0.00125711	0.359053	0.835116	0.989888	0.229407	2.66162e-22	5.48205e-32	0.214074
FC-MZUSP	Chloroscombrus chrysurus	1025	141.012	36.1258	0.647769	1.54376	0.957944	0.457317	31.733	0.605313	0.942163	0.992057	0.094269	3.28909e-17	-1.59848e-25	0.226585
FC-MZUSP	Chloroscombrus chrysurus	1519	181.74	43.9778	0.577918	1.73035	0.931902	0.308591	14.4394	0.604758	0.928362	0.991582	0.125823	4.05042e-17	-1.96023e-25	0.24715
FC-MZUSP	Chloroscombrus chrysurus	52071	1171.3	257.486	0.476943	2.09668	0.820727	0.00900213	0.00214086	0.406238	0.835116	0.990649	0.193835	4.33598e-24	9.51781e-33	0.315155
FC-MZUSP	Chloroscombrus chrysurus	61223	1232.98	279.198	0.506068	1.97602	0.900722	0.00765644	0.00520959	0.387913	0.942163	0.988998	0.0997744	-4.08745e-21	-3.83679e-32	0.228056
FC-MZUSP	Chloroscombrus chrysurus	84032	2052.79	327.098	0.250591	3.99057	0.802705	0.00557823	0.00142504	0.28922	0.877437	0.988289	0.262122	2.14918e-21	1.52386e-31	0.232189
FC-MZUSP	Chloroscombrus chrysurus	85381	2165.26	329.713	0.22885	4.36967	0.782028	0.0054901	0.00139769	0.29563	0.877437	0.990155	0.211704	3.43274e-21	6.33325e-31	0.236487
FC-MZUSP	Chloroscombrus chrysurus	95586	1379.93	348.861	0.630797	1.5853	0.866655	0.00490396	0.000709401	0.452232	0.78556	0.989939	0.217744	-4.2035e-23	9.12628e-33	0.206002
FC-MZUSP	Chloroscombrus chrysurus	95878	1360.69	349.393	0.650741	1.53671	0.842639	0.00488903	0.000598828	0.388639	0.835116	0.99353	0.129415	-2.73218e-24	4.63717e-33	0.231647
FC-MZUSP	Chloroscombrus chrysurus	96630	2084.61	350.761	0.27943	3.57871	0.851058	0.00485098	0.000651766	0.430069	0.835116	0.98988	0.204336	-2.33968e-24	1.5747e-32	0.215822
FC-MZUSP	Chloroscombrus orqueta	96917	1317.06	351.281	0.702099	1.4243	0.890699	0.00483661	0.000616196	0.530018	0.625262	0.993396	0.152974	-7.05157e-25	1.94635e-34	0.211995
FC-MZUSP	Chloroscombrus orqueta	98262	1335.04	353.71	0.692795	1.44343	0.900503	0.00477041	0.000595953	0.507523	0.696212	0.990675	0.209282	5.97971e-24	7.0881e-34	0.20741
FC-MZUSP	Chloroscombrus orqueta	99461	1365.2	355.862	0.670614	1.49117	0.855498	0.0047129	0.000483823	0.348389	0.835116	0.992444	0.155213	1.87141e-25	6.87582e-34	0.225072
FC-MZUSP	Chloroscombrus orqueta	100866	1328.13	358.367	0.718575	1.39164	0.900244	0.00464725	0.000465866	0.465461	0.728134	0.991621	0.185029	3.50202e-24	1.33779e-33	0.208369
FC-MZUSP	Chloroscombrus orqueta	3423	315.397	66.0174	0.432416	2.31259	0.881762	0.136941	2.91494	0.618292	0.912999	0.98969	0.0635505	9.40539e-17	-1.95653e-25	0.375284
FC-MZUSP	Chloroscombrus orqueta	59306	1654.67	274.792	0.2722	3.67377	0.84202	0.00790392	0.00590381	0.412716	0.928362	0.989488	0.0808605	-1.20582e-21	1.40228e-29	0.240938
FC-MZUSP	Chloroscombrus orqueta	91376	1292.23	341.092	0.687639	1.45425	0.868841	0.0051299	0.000840276	0.323508	0.857148	0.993512	0.147059	6.28472e-23	8.07111e-33	0.219514
FC-MZUSP	Chloroscombrus orqueta	97979	2222.12	353.201	0.249349	4.01045	0.843106	0.00478419	0.000531027	0.334335	0.835116	0.992347	0.148555	8.29503e-25	6.56149e-34	0.22307
FC-MZUSP	Chloroscombrus orqueta	55762	1224.8	266.455	0.467108	2.14083	0.842263	0.00840626	0.00638602	0.409186	0.965202	0.993871	0.0541103	-1.23394e-20	-3.51997e-31	0.221976
FC-MZUSP	Chloroscombrus orqueta	55941	1417.97	266.883	0.349627	2.86019	0.869256	0.00837936	0.00665846	0.424896	0.942163	0.993629	0.0492063	9.22697e-22	3.13656e-31	0.260316
FC-MZUSP	Chloroscombrus orqueta	57877	1388.6	271.461	0.377191	2.65118	0.815904	0.00809907	0.0058616	0.41731	0.954434	0.992168	0.0673099	-7.99987e-21	2.64544e-30	0.23078
FC-MZUSP	Chloroscombrus orqueta	62164	1489.69	281.335	0.352012	2.84081	0.794682	0.00754054	0.00284888	0.289857	0.928362	0.991597	0.117226	2.1821e-21	6.10231e-31	0.276366
FC-MZUSP	Chloroscombrus orqueta	66128	1492.08	290.167	0.373259	2.6791	0.806606	0.00708853	0.00230115	0.294072	0.928362	0.988955	0.251203	8.57067e-22	8.72716e-32	0.274916
FC-MZUSP	Chloroscombrus orqueta	67742	1242.48	293.687	0.551433	1.81346	0.931635	0.00691964	0.00294004	0.370323	0.912999	0.994355	0.0297828	-2.79938e-21	-4.22679e-32	0.213385
FC-MZUSP	Hoplias aimara	77519	1848	314.166	0.285241	3.50581	0.853123	0.0060469	0.00234295	0.331995	0.928362	0.991946	0.199582	6.35465e-22	4.63374e-32	0.193585
FC-MZUSP	Hoplias aimara	89631	1362.25	337.819	0.606952	1.64758	0.872746	0.00522978	0.000963935	0.306237	0.835116	0.993535	0.144912	5.18076e-23	8.43404e-33	0.218837
FC-MZUSP	Hoplias aimara	91741	1291.87	341.772	0.690771	1.44766	0.917364	0.00510949	0.00088907	0.348291	0.835116	0.99047	0.210551	3.82941e-24	6.28583e-34	0.200091
FC-MZUSP	Hoplias aimara	1182	150.912	38.7939	0.652201	1.53327	0.935127	0.396574	25.5982	0.649262	0.835116	0.994575	0.0452214	-1.23284e-19	-1.28147e-26	0.217729
FC-MZUSP	Hoplias aimara	24415	963.037	176.313	0.330812	3.02287	0.829286	0.0191993	0.0477785	0.537247	0.896038	0.992164	0.0621136	-5.19912e-19	-3.6984e-28	0.554921
FC-MZUSP	Hoplias aimara	29141	995.563	192.623	0.369468	2.7066	0.837794	0.0160856	0.0326213	0.522924	0.857148	0.991159	0.0871261	-1.22706e-19	3.52952e-28	0.451407
FC-MZUSP	Hoplias aimara	82149	2285.63	323.412	0.197607	5.06056	0.849964	0.0057061	0.00195818	0.391233	0.912999	0.987781	0.253918	-2.41729e-21	5.28115e-31	0.205229
FC-MZUSP	Hoplias aimara	85912	2062.21	330.736	0.253863	3.93913	0.842646	0.00545616	0.00135918	0.324034	0.877437	0.992571	0.214085	5.86213e-22	4.76103e-32	0.215201
FC-MZUSP	Hoplias aimara	87369	2031.6	333.529	0.266005	3.75933	0.817947	0.00536518	0.00127601	0.332443	0.835116	0.989365	0.205522	1.06804e-22	1.6715e-32	0.210919
FC-MZUSP	Hoplias aimara	91043	2179.6	340.47	0.240825	4.15239	0.881593	0.00514867	0.00113798	0.329789	0.877437	0.990905	0.256717	1.33874e-22	1.03902e-32	0.209284
FC-MZUSP	Hoplias aimara	91817	2060.73	341.914	0.2717	3.68053	0.848813	0.00510526	0.000963553	0.27021	0.912999	0.989491	0.162464	1.08913e-22	3.59337e-32	0.216724
FC-MZUSP	Hoplias aimara	93380	2080.97	344.812	0.270976	3.69037	0.859054	0.00501981	0.000858234	0.397256	0.835116	0.988455	0.252247	-1.16124e-23	2.2574e-33	0.213924
FC-MZUSP	Hoplias aimara	91686	2073.09	341.67	0.268087	3.73013	0.809254	0.00511256	0.000838084	0.391883	0.78556	0.98966	0.159783	8.26647e-23	2.19524e-32	0.235584
FC-MZUSP	Hoplias aimara	94888	2231.78	347.585	0.239397	4.17716	0.805091	0.00494003	0.000671548	0.403969	0.78556	0.99204	0.123292	4.52252e-24	3.0947e-33	0.244834
FC-MZUSP	Hoplias aimara	95878	1373.08	349.393	0.639055	1.56481	0.823843	0.00488903	0.000634766	0.445005	0.78556	0.990066	0.1867	3.85413e-24	2.32031e-33	0.236627
FC-MZUSP	Hoplias aimara	96245	1360.55	350.061	0.653369	1.53053	0.813877	0.00487038	0.000602468	0.415447	0.78556	0.991139	0.139482	1.99044e-23	1.04827e-32	0.243081
FC-MZUSP	Hoplias aimara	97296	1349.72	351.967	0.671144	1.48999	0.823551	0.00481777	0.000513286	0.392284	0.835116	0.993039	0.133467	1.3144e-25	1.16002e-34	0.240493
FC-MZUSP	Hoplias brasiliensis	97961	2123.39	353.168	0.273025	3.66267	0.829608	0.00478507	0.00050982	0.447686	0.811278	0.992888	0.132815	1.33749e-24	6.59171e-34	0.236105
FC-MZUSP	Hoplias brasiliensis	99410	2386.97	355.771	0.219252	4.56095	0.843394	0.00471532	0.00054839	0.421471	0.835116	0.988956	0.195982	1.13653e-23	3.76117e-33	0.224649
FC-MZUSP	Hoplias brasiliensis	1116	140.083	37.6953	0.714663	1.39926	0.973822	0.420027	24.5625	0.560069	0.928362	0.986072	0.0742523	9.09056e-18	3.5501e-26	0.20393
FC-MZUSP	Hoplias brasiliensis	91378	1358.99	341.095	0.62175	1.60836	0.780295	0.00512979	0.000738023	0.297877	0.835116	0.993479	0.102932	1.10831e-23	2.27571e-32	0.260339
FC-MZUSP	Hoplias brasiliensis	93358	1390.92	344.771	0.606398	1.64908	0.81741	0.00502099	0.000694276	0.348745	0.811278	0.992835	0.123133	1.00558e-22	1.42855e-32	0.238687
FC-MZUSP	Hoplias brasiliensis	97052	1391.62	351.526	0.629755	1.58792	0.827404	0.00482989	0.000542765	0.290126	0.835116	0.991002	0.182565	5.32497e-23	1.96284e-32	0.235318
FC-MZUSP	Hoplias brasiliensis	97868	1363.78	353.001	0.661243	1.5123	0.824527	0.00478961	0.000468272	0.316283	0.835116	0.992498	0.126307	2.97538e-23	1.61503e-32	0.240895
FC-MZUSP	Hoplias brasiliensis	42334	1182.06	232.167	0.380735	2.6265	0.721586	0.0110727	0.00470865	0.294192	0.857148	0.991094	0.203425	1.41747e-21	1.63475e-31	0.404197
FC-MZUSP	Hoplias brasiliensis	51106	1120.11	255.089	0.511866	1.95363	0.845076	0.00917211	0.00255717	0.371639	0.835116	0.98905	0.205439	7.51683e-24	5.10233e-33	0.297262
FC-MZUSP	Hoplias brasiliensis	96822	2175.54	351.109	0.257068	3.89002	0.859204	0.00484136	0.00066893	0.361203	0.835116	0.989195	0.202448	1.7027e-23	3.05251e-33	0.204845
FC-MZUSP	Hoplias brasiliensis	98685	1449.43	354.471	0.590293	1.69407	0.862322	0.00474996	0.000633511	0.362441	0.896038	0.988746	0.226842	1.32631e-22	2.07297e-32	0.213176
FC-MZUSP	Hoplias brasiliensis	100042	2071.13	356.9	0.293073	3.41212	0.88492	0.00468553	0.000488148	0.429196	0.757878	0.990413	0.227619	1.17167e-23	4.13183e-33	0.209697
FC-MZUSP	Hoplias brasiliensis	1017	132.669	35.9845	0.726092	1.37724	0.96673	0.460914	32.2621	0.604659	0.877437	0.990069	0.0509691	2.22404e-17	1.05566e-24	0.201174
FC-MZUSP	Hoplias brasiliensis	1567	173.983	44.6673	0.650529	1.53721	0.941707	0.299138	12.1758	0.549418	0.965202	0.988307	0.0781788	3.44168e-18	1.75151e-26	0.216857
FC-MZUSP	Hoplias brasiliensis	1585	177.154	44.9231	0.634652	1.57567	0.93787	0.295741	12.6676	0.57886	0.942163	0.989231	0.0869841	2.66829e-18	7.7374e-27	0.217661
FC-MZUSP	Hoplias brasiliensis	47277	972.534	245.347	0.628131	1.59202	0.967958	0.00991497	0.00272092	0.318994	0.811278	0.990983	0.168112	2.8892e-22	6.24186e-32	0.246935
FC-MZUSP	Hoplias brasiliensis	51417	1231.1	255.864	0.426313	2.3457	0.8012	0.00911663	0.00220819	0.354023	0.835116	0.992276	0.154043	5.12091e-23	3.98846e-32	0.335661
FC-MZUSP	Hoplias brasiliensis	91969	1390.92	342.197	0.597376	1.67399	0.830225	0.00509683	0.000828312	0.299939	0.877437	0.992441	0.15858	2.85267e-22	6.33997e-32	0.233936
FC-MZUSP	Hoplias curupira	95275	1332.1	348.293	0.674709	1.48212	0.870226	0.00491997	0.000765397	0.32822	0.835116	0.981615	0.356942	1.6431e-23	5.58033e-33	0.210516
FC-MZUSP	Hoplias curupira	98898	1324.53	354.853	0.708388	1.41166	0.87257	0.00473973	0.000457366	0.394008	0.811278	0.992768	0.144027	-5.34324e-23	3.99697e-34	0.21227
FC-MZUSP	Hoplias curupira	99099	1344.45	355.214	0.688953	1.45148	0.859287	0.00473012	0.000431827	0.383702	0.811278	0.994559	0.0898162	-4.10919e-23	1.23618e-34	0.221307
FC-MZUSP	Hoplias curupira	100317	1374.59	357.39	0.66717	1.49887	0.851111	0.00467269	0.000431159	0.361162	0.835116	0.992906	0.125004	2.25238e-23	7.44564e-33	0.224347
FC-MZUSP	Hoplias curupira	100423	1325.71	357.579	0.71804	1.39268	0.872849	0.00466776	0.000432377	0.451409	0.78556	0.992387	0.158271	-6.78328e-24	1.54423e-33	0.216051
FC-MZUSP	Hoplias curupira	101807	1328.63	360.034	0.72473	1.37982	0.88888	0.0046043	0.000368821	0.39106	0.696212	0.992816	0.152941	-3.54904e-23	-1.95951e-34	0.207393
FC-MZUSP	Hoplias curupira	1002	132.426	35.7181	0.718007	1.39274	0.96999	0.467814	30.9614	0.566559	0.954434	0.99045	0.0674937	1.03182e-18	5.00374e-27	0.203099
FC-MZUSP	Hoplias curupira	1185	145.497	38.8431	0.703424	1.42162	0.967347	0.39557	27.0606	0.681799	0.877437	0.99103	0.0544027	1.8969e-16	1.94593e-24	0.206237
FC-MZUSP	Hoplias curupira	1259	150.326	40.0376	0.700113	1.42834	0.968462	0.372319	19.2871	0.558756	0.988699	0.989359	0.076274	6.7411e-20	1.61162e-27	0.205169
FC-MZUSP	Hoplias curupira	1285	156.669	40.4489	0.65788	1.52003	0.934545	0.364786	23.6283	0.698833	0.877437	0.992209	0.057335	5.56586e-16	1.40927e-23	0.214279
FC-MZUSP	Hoplias curupira	1366	159.74	41.7043	0.672717	1.48651	0.968108	0.343155	16.9394	0.575319	0.982317	0.989467	0.0939098	1.07637e-18	1.62311e-26	0.207946
FC-MZUSP	Hoplias curupira	1412	163.154	42.4006	0.666572	1.50021	0.960544	0.331976	14.8976	0.543344	0.974489	0.989207	0.0907519	1.22748e-19	4.70147e-28	0.211798
FC-MZUSP	Hoplias curupira	32022	980.894	201.92	0.418229	2.39104	0.946193	0.0146384	0.0240614	0.474131	0.942163	0.991877	0.0677945	-2.01022e-19	-2.67081e-29	0.42527
FC-MZUSP	Hoplias curupira	40432	1230.57	226.891	0.335522	2.98043	0.788532	0.0135227	0.0311999	0.667694	0.982317	0.985751	0.165958	6.23555e-23	-1.33462e-32	0.319251
FC-MZUSP	Hoplias curupira	42429	1125.29	232.427	0.421057	2.37497	0.883293	0.0128862	0.0257087	0.618846	0.993651	0.986186	0.0895348	1.93045e-21	4.98183e-31	0.284306
FC-MZUSP	Hoplias curupira	47451	1291.08	245.798	0.357727	2.79543	0.731456	0.0115224	0.0219823	0.647697	0.99718	0.983345	0.169646	-1.95106e-18	2.67634e-27	0.348059
FC-MZUSP	Hoplias curupira	49096	1715.5	250.022	0.20964	4.77009	0.672585	0.0111363	0.0189603	0.609323	0.928362	0.980278	0.171722	2.17079e-18	-1.34869e-28	0.318337
FC-MZUSP	Hoplias curupira	52014	1376.69	257.345	0.344872	2.89963	0.708078	0.0105116	0.0167797	0.596734	0.965202	0.982056	0.183932	1.72976e-18	1.18916e-27	0.32786
FC-MZUSP	Hoplias curupira	92798	1426.86	343.735	0.572777	1.74588	0.886755	0.00505129	0.000834162	0.318765	0.835116	0.990757	0.172891	6.20762e-23	4.67451e-33	0.212014
FC-MZUSP	Hoplias curupira	96156	1434.94	349.899	0.586836	1.70405	0.84966	0.00487489	0.000642966	0.311677	0.877437	0.989652	0.216934	1.05879e-23	3.13683e-33	0.213387
FC-MZUSP	Hoplias curupira	96850	1355.93	351.16	0.661964	1.51066	0.858668	0.00483996	0.000611135	0.376262	0.835116	0.990926	0.175322	-9.05905e-25	7.8832e-34	0.215806
FC-MZUSP	Hoplias curupira	98264	1379.99	353.714	0.648414	1.54222	0.854722	0.00477031	0.000525375	0.344185	0.811278	0.991917	0.143317	4.79214e-25	3.3423e-33	0.220779
FC-MZUSP	Hoplias curupira	99509	1343.12	355.948	0.693175	1.44264	0.872534	0.00471063	0.00047961	0.351489	0.835116	0.990494	0.193475	-2.6434e-23	7.03376e-34	0.213327
FC-MZUSP	Hoplias curupira	99810	1354.69	356.486	0.683442	1.46318	0.860438	0.00469642	0.000434376	0.395915	0.835116	0.992921	0.109198	-3.17044e-23	-1.50441e-34	0.221704
FC-MZUSP	Hoplias curupira	99854	1381.71	356.564	0.657271	1.52144	0.860825	0.00469435	0.000462828	0.366288	0.835116	0.991451	0.171195	8.5894e-24	2.28742e-33	0.216479
FC-MZUSP	Hoplias curupira	100833	1409.65	358.308	0.637664	1.56822	0.863888	0.00464878	0.000443737	0.385542	0.835116	0.990852	0.18462	3.28953e-24	6.19124e-34	0.21597
FC-MZUSP	Hoplias curupira	101259	1397.93	359.064	0.651136	1.53578	0.877598	0.00462922	0.000454194	0.421866	0.811278	0.989732	0.203008	1.02898e-23	1.27303e-33	0.208243
FC-MZUSP	Hoplias curupira	6823	511.421	93.2058	0.327814	3.05051	0.692479	0.0801334	0.965319	0.585838	0.999295	0.974663	0.271655	-2.04226e-20	8.49582e-29	0.36557
FC-MZUSP	Hoplias curupira	17886	1269.7	150.908	0.13942	7.17259	0.689142	0.0305686	0.147774	0.61244	0.896038	0.973968	0.22659	-5.53379e-18	-1.67994e-27	0.760778
FC-MZUSP	Hoplias curupira	29926	1333.78	195.2	0.211393	4.73052	0.847138	0.0182701	0.0408493	0.48504	0.982317	0.968424	0.304625	-7.72928e-20	2.27251e-29	0.500213
FC-MZUSP	Hoplias curupira	41440	1594.05	229.702	0.204941	4.87946	0.71489	0.0131938	0.02994	0.665636	0.982317	0.977104	0.196256	-4.82367e-18	-1.99414e-29	0.217569
FC-MZUSP	Hoplias curupira	49662	2027.35	251.459	0.151837	6.58602	0.59317	0.0110094	0.0213249	0.682862	0.942163	0.980836	0.209225	-2.00719e-18	2.59887e-27	0.327645
FC-MZUSP	Hoplias curupira	65247	2470.88	288.227	0.134297	7.44616	0.590626	0.0083797	0.00974728	0.543984	0.974489	0.974825	0.209225	-2.05103e-18	5.44123e-28	0.310215
FC-MZUSP	Hoplias curupira	1167	143.841	38.547	0.70879	1.41085	0.967662	0.401671	22.5316	0.557698	0.988699	0.988163	0.0963826	2.72279e-19	7.95407e-29	0.204325
FC-MZUSP	Hoplias intermedius	1320	142.711	40.9961	0.814462	1.2278	0.965618	0.414205	27.4373	0.624271	0.965202	0.978064	0.171751	-8.801e-19	2.99838e-28	0.185578
FC-MZUSP	Hoplias intermedius	1324	157.154	41.0581	0.673667	1.48441	0.958032	0.354041	17.8343	0.566221	0.954434	0.987516	0.100359	1.0066e-18	6.73392e-27	0.211786
FC-MZUSP	Hoplias intermedius	2797	250.853	59.6762	0.558553	1.79034	0.910778	0.195477	5.21383	0.530773	0.954434	0.967132	0.292422	-1.15243e-20	-1.61728e-30	0.233353
FC-MZUSP	Hoplias intermedius	44410	1561.4	237.791	0.228908	4.36856	0.62301	0.0123114	0.0217768	0.56142	0.811278	0.972846	0.238041	-2.09197e-18	-4.18698e-28	0.374065
FC-MZUSP	Hoplias intermedius	50599	1985.96	253.82	0.161217	6.20282	0.580437	0.0108055	0.0186951	0.631447	0.993651	0.977241	0.189403	-6.48173e-18	5.79033e-27	0.378105
FC-MZUSP	Hoplias intermedius	50882	1918.83	254.529	0.173661	5.75836	0.760989	0.0107455	0.0189706	0.639967	0.954434	0.977676	0.150454	-1.06952e-19	-3.8194e-29	0.23528
FC-MZUSP	Hoplias intermedius	55252	1898.81	265.234	0.192574	5.19282	0.621542	0.00989557	0.0146064	0.586193	0.942163	0.976774	0.20896	-1.76731e-19	1.87887e-29	0.323821
FC-MZUSP	Hoplias intermedius	60424	1906.76	277.37	0.208846	4.78822	0.708603	0.00904856	0.0114208	0.554557	0.912999	0.977817	0.171636	2.51657e-20	-9.96447e-29	0.281332
FC-MZUSP	Hoplias intermedius	62828	2051.01	282.834	0.187685	5.32808	0.650205	0.00870233	0.0102292	0.535692	0.912999	0.974981	0.22228	-4.55553e-20	2.4085e-29	0.275563
FC-MZUSP	Hoplias intermedius	64341	2160.37	286.219	0.173237	5.77242	0.713117	0.00849769	0.0103376	0.56353	0.999295	0.974963	0.217367	-1.1705e-19	1.45642e-29	0.264196
FC-MZUSP	Hoplias intermedius	67100	2314.14	292.292	0.157453	6.35109	0.680251	0.00814829	0.0091102	0.539773	0.965202	0.970881	0.211595	1.2143e-19	9.54615e-29	0.29351
FC-MZUSP	Hoplias intermedius	69762	2330.89	298.033	0.161356	6.19747	0.670847	0.00783736	0.00746478	0.482532	0.928362	0.97066	0.236609	-3.27674e-19	-7.7687e-29	0.265427
FC-MZUSP	Hoplias intermedius	70540	2091.63	299.69	0.202616	4.93544	0.684376	0.00775092	0.00758315	0.4988	0.928362	0.971419	0.234418	7.2068e-19	3.13893e-28	0.253404
FC-MZUSP	Hoplias intermedius	88962	1393.61	336.556	0.575619	1.73726	0.781479	0.0052691	0.000925148	0.336201	0.835116	0.993344	0.11325	1.98221e-22	6.35421e-32	0.25802
FC-MZUSP	Hoplias intermedius	94441	1398.89	346.765	0.606458	1.64892	0.807803	0.00496342	0.000593127	0.30912	0.896038	0.992568	0.125397	1.14874e-22	2.27005e-32	0.246304
FC-MZUSP	Hoplias intermedius	97111	1381.66	351.633	0.639254	1.56432	0.831408	0.00482695	0.000569081	0.309275	0.835116	0.991436	0.165439	2.94724e-22	5.66386e-32	0.233307
FC-MZUSP	Hoplias intermedius	97598	1423.2	352.513	0.605504	1.65152	0.838248	0.00480286	0.000571844	0.293602	0.835116	0.991019	0.166617	3.29134e-22	5.81357e-32	0.228587
FC-MZUSP	Hoplias intermedius	98026	1391.44	353.285	0.636243	1.57173	0.829639	0.00478189	0.000456058	0.328922	0.835116	0.994382	0.109407	2.27816e-23	6.11291e-33	0.236266
FC-MZUSP	Hoplias intermedius	98121	1380.59	353.457	0.646905	1.54582	0.839294	0.00477726	0.000473843	0.312796	0.835116	0.992133	0.137185	1.4581e-22	2.51716e-32	0.231288
FC-MZUSP	Hoplias lacerdae	98575	1374.65	354.273	0.655528	1.52549	0.844268	0.00475526	0.0004562	0.355865	0.696212	0.993506	0.122548	1.28109e-23	3.80686e-33	0.229324
FC-MZUSP	Hoplias lacerdae	101444	1396.35	359.392	0.653804	1.52951	0.849964	0.00462078	0.000376519	0.35398	0.835116	0.992181	0.144762	1.28392e-23	2.808e-33	0.22844
FC-MZUSP	Hoplias lacerdae	103350	1387.48	362.752	0.674632	1.48229	0.865013	0.00453556	0.000314268	0.352039	0.835116	0.992584	0.140409	8.50564e-24	1.95935e-33	0.223219
FC-MZUSP	Hoplias lacerdae	106149	2849.32	367.632	0.164302	6.08636	0.781847	0.00515078	0.00301821	0.442302	0.988699	0.959419	0.352718	-2.58197e-22	4.10161e-30	0.213607
FC-MZUSP	Hoplias lacerdae	33320	1070.22	205.972	0.365567	2.73548	0.805415	0.0164091	0.0486959	0.708351	0.993651	0.988324	0.0734582	-1.92499e-20	5.08036e-31	0.355898
FC-MZUSP	Hoplias lacerdae	33645	1118.51	206.974	0.337951	2.95901	0.74548	0.0162506	0.0487174	0.721016	0.954434	0.987937	0.102439	-3.30954e-20	2.37686e-28	0.344647
FC-MZUSP	Hoplias lacerdae	36199	1159.6	214.686	0.338289	2.95605	0.773285	0.015104	0.0404488	0.693875	0.993651	0.98604	0.106707	1.82103e-18	-3.1302e-27	0.322814
FC-MZUSP	Hoplias lacerdae	41459	1873.27	229.755	0.148467	6.73551	0.601876	0.0131877	0.027067	0.604025	0.912999	0.977205	0.214345	4.78754e-18	3.73748e-27	0.265786
FC-MZUSP	Hoplias lacerdae	43429	1871.27	235.15	0.155854	6.41625	0.610859	0.0125895	0.0273592	0.678923	0.993651	0.981575	0.176964	2.4945e-18	3.67913e-27	0.385825
FC-MZUSP	Hoplias lacerdae	48052	2087.37	247.349	0.138586	7.21571	0.580654	0.0113783	0.0222297	0.669416	0.974489	0.98049	0.152602	-5.6879e-18	4.469e-26	0.407509
FC-MZUSP	Hoplias lacerdae	48985	1656.22	249.739	0.224407	4.45618	0.773342	0.0111616	0.0199825	0.62738	0.974489	0.979155	0.164404	7.72963e-20	9.71443e-28	0.289069
FC-MZUSP	Hoplias lacerdae	49959	1834.24	252.21	0.186599	5.35908	0.763584	0.010944	0.0202392	0.657917	0.988699	0.978261	0.126622	-7.60419e-21	2.06328e-29	0.278279
FC-MZUSP	Hoplias lacerdae	52194	2214.49	257.79	0.133747	7.4768	0.609828	0.0104753	0.0182904	0.650125	0.974489	0.978947	0.185916	-1.10387e-18	-7.84762e-28	0.348826
FC-MZUSP	Laemolyta cf garmani	76740	2137.08	312.583	0.21115	4.73596	0.705188	0.00610829	0.00208229	0.352285	0.696212	0.992973	0.14218	7.31691e-21	2.11692e-30	0.299891
FC-MZUSP	Laemolyta cf garmani	80123	2008.75	319.399	0.249526	4.0076	0.74276	0.00585038	0.0016364	0.332119	0.696212	0.992759	0.147494	1.079e-21	6.42741e-31	0.261757
FC-MZUSP	Laemolyta cf garmani	89454	1415.12	337.485	0.561336	1.78146	0.77701	0.00524012	0.000995432	0.295107	0.835116	0.992061	0.136307	5.71108e-22	1.15633e-31	0.255777
FC-MZUSP	Laemolyta cf garmani	94532	1408.48	346.932	0.598812	1.66997	0.818246	0.00495864	0.000744431	0.290537	0.835116	0.991274	0.202297	5.18433e-22	1.50703e-31	0.233323
FC-MZUSP	Laemolyta cf garmani	1170	129.255	38.5965	0.880039	1.13631	0.974188	0.467308	38.4648	0.687354	0.99718	0.986442	0.109085	4.66362e-19	1.09577e-28	0.167044
FC-MZUSP	Laemolyta cf garmani	1878	198.024	48.8993	0.601822	1.66162	0.852861	0.291134	13.0346	0.605268	0.974489	0.980442	0.154923	8.7609e-21	8.87933e-30	0.17955
FC-MZUSP	Laemolyta cf garmani	4837	406.35	78.4771	0.368116	2.71653	0.774664	0.0969092	1.16676	0.500402	0.942163	0.979612	0.0803843	1.08796e-20	-3.8791e-30	0.489482
FC-MZUSP	Laemolyta cf garmani	4954	406.35	79.4206	0.37702	2.65238	0.781388	0.0946205	1.21849	0.540469	0.99718	0.978668	0.0967502	6.7522e-21	1.3347e-28	0.485643
FC-MZUSP	Laemolyta cf garmani	10677	473.848	116.595	0.59756	1.67347	0.910308	0.0512082	0.428753	0.637749	0.965202	0.980464	0.192067	1.65677e-20	3.00044e-29	0.176731
FC-MZUSP	Laemolyta cf garmani	21768	798.642	166.481	0.428869	2.33172	0.860497	0.0251171	0.126184	0.779867	0.982317	0.991649	0.0499055	-4.75491e-17	-5.78485e-26	0.365253
FC-MZUSP	Laemolyta cf garmani	36999	1382.07	217.045	0.243411	4.10828	0.61893	0.0147774	0.0403201	0.718393	0.993651	0.987014	0.100613	6.61765e-21	6.94964e-31	0.346876
FC-MZUSP	Laemolyta cf garmani	38168	1315.22	220.447	0.277274	3.60654	0.784559	0.0143248	0.0359417	0.685877	0.99718	0.986734	0.091275	-1.21078e-20	1.45452e-31	0.29178
FC-MZUSP	Laemolyta cf garmani	39485	1657.33	224.218	0.180645	5.53571	0.713279	0.013847	0.0354062	0.719055	0.942163	0.98406	0.156398	-2.3105e-20	-3.18675e-28	0.350351
FC-MZUSP	Laemolyta cf garmani	42113	1691.47	231.56	0.184969	5.40631	0.621631	0.0129829	0.0304109	0.700798	0.942163	0.98111	0.188537	1.33675e-18	3.67184e-28	0.344666
FC-MZUSP	Laemolyta cf garmani	42176	1467.32	231.733	0.246165	4.06231	0.688228	0.0111141	0.0178532	0.559108	0.993651	0.971123	0.168087	1.04541e-18	3.36174e-27	0.272329
FC-MZUSP	Laemolyta cf garmani	42834	1456.33	233.534	0.253793	3.94023	0.767401	0.0127644	0.0255482	0.613716	0.965202	0.977584	0.213586	-4.40715e-19	-1.35069e-29	0.318139
FC-MZUSP	Laemolyta cf garmani	52101	1389.08	257.56	0.339316	2.94711	0.743185	0.00899695	0.0111976	0.529701	0.928362	0.968959	0.204979	-6.6744e-21	-8.89938e-30	0.219358
FC-MZUSP	Laemolyta cf garmani	54651	2020.69	263.787	0.168194	5.94553	0.785385	0.0100044	0.0161692	0.631317	0.993651	0.980709	0.155768	1.07017e-20	2.33039e-30	0.231497
FC-MZUSP	Laemolyta cf garmani	55022	2019.84	264.681	0.169477	5.9005	0.719693	0.00993693	0.0158146	0.622219	0.982317	0.978081	0.181426	3.69093e-20	3.3186e-29	0.220563
FC-MZUSP	Laemolyta cf garmani	56601	1687.1	268.452	0.249892	4.00173	0.732936	0.00828166	0.00847687	0.481746	0.99718	0.971788	0.206316	-2.35699e-18	2.2954e-27	0.251171
FC-MZUSP	Laemolyta fernandezi	56638	1952.69	268.54	0.18666	5.35732	0.733444	0.00965341	0.014087	0.595765	0.982317	0.976603	0.215527	-3.84189e-20	-7.03651e-32	0.249372
FC-MZUSP	Laemolyta fernandezi	59747	2304.06	275.812	0.141429	7.07069	0.622267	0.00784558	0.0076344	0.493398	0.988699	0.975217	0.124185	-2.8944e-20	9.94576e-29	0.267354
FC-MZUSP	Laemolyta fernandezi	61360	2027.81	279.51	0.187517	5.33285	0.66935	0.00763934	0.006385	0.447302	0.912999	0.976097	0.0922055	-5.01832e-20	2.35277e-30	0.248463
FC-MZUSP	Laemolyta fernandezi	61744	1349.21	280.383	0.426231	2.34614	0.837741	0.00759183	0.00534926	0.409898	0.99718	0.974705	0.105731	4.19922e-20	9.10373e-30	0.21284
FC-MZUSP	Laemolyta fernandezi	61828	1329.25	280.574	0.439724	2.27415	0.860132	0.00758152	0.00590977	0.431346	0.999295	0.9766	0.0947034	3.05326e-21	5.3677e-31	0.185792
FC-MZUSP	Laemolyta fernandezi	62160	1289.27	281.326	0.469931	2.12797	0.888825	0.00754102	0.00549013	0.416359	0.942163	0.976377	0.100284	5.03662e-22	1.94893e-31	0.193828
FC-MZUSP	Laemolyta fernandezi	66031	2443.17	289.954	0.139012	7.19363	0.761322	0.00709894	0.00572512	0.462821	0.99718	0.974436	0.214586	3.91048e-20	5.52746e-29	0.261023
FC-MZUSP	Laemolyta fernandezi	71466	1214.33	301.651	0.609023	1.64197	0.949374	0.00655906	0.00326351	0.351966	0.928362	0.966038	0.191203	3.53548e-21	1.27301e-30	0.217314
FC-MZUSP	Laemolyta fernandezi	75291	2645.39	309.618	0.135199	7.39651	0.627425	0.00622584	0.00305248	0.348541	0.993651	0.972177	0.376332	-1.19044e-22	-3.44555e-31	0.302991
FC-MZUSP	Laemolyta fernandezi	76193	1526.88	311.467	0.410689	2.43493	0.753998	0.00615214	0.00180016	0.400949	0.728134	0.992764	0.145998	6.79899e-22	8.54001e-32	0.276901
FC-MZUSP	Laemolyta fernandezi	78999	2375.69	317.151	0.175895	5.68521	0.65833	0.00593362	0.00251339	0.326331	0.912999	0.97044	0.331019	1.54443e-21	1.99396e-31	0.287332
FC-MZUSP	Laemolyta fernandezi	84217	2017.98	327.458	0.259882	3.8479	0.770611	0.00556598	0.0012442	0.337786	0.696212	0.991774	0.157444	-3.40737e-21	1.3767e-31	0.25166
FC-MZUSP	Laemolyta orinocensis	84771	1847.7	328.533	0.31203	3.20482	0.787908	0.0055296	0.00114176	0.345423	0.78556	0.99332	0.132598	-2.61804e-21	7.50464e-32	0.241207
FC-MZUSP	Laemolyta orinocensis	84812	1964.62	328.612	0.276126	3.62153	0.786206	0.00552693	0.0012311	0.393416	0.757878	0.991487	0.19208	-3.27222e-21	2.04414e-31	0.257942
FC-MZUSP	Laemolyta orinocensis	85030	2068.06	329.034	0.249836	4.00263	0.783694	0.00551276	0.00129068	0.352484	0.728134	0.99072	0.211796	-4.1412e-21	4.0758e-32	0.242946
FC-MZUSP	Laemolyta orinocensis	86374	1964.49	331.624	0.281251	3.55555	0.785911	0.00542698	0.00123241	0.336795	0.877437	0.990189	0.251537	4.29241e-21	3.6886e-31	0.24964
FC-MZUSP	Laemolyta orinocensis	95525	1370.05	348.749	0.639521	1.56367	0.847634	0.00490709	0.000683382	0.36543	0.877437	0.989978	0.207552	-3.34034e-22	4.1628e-33	0.225544
FC-MZUSP	Laemolyta orinocensis	98487	1346.05	354.115	0.683073	1.46397	0.870511	0.00475951	0.000647875	0.327944	0.857148	0.988274	0.256349	-1.16827e-22	1.78429e-32	0.212582
FC-MZUSP	Laemolyta orinocensis	99764	1352.88	356.404	0.684963	1.45993	0.875215	0.00469859	0.000717521	0.288466	0.835116	0.986071	0.281245	4.77066e-23	7.64853e-32	0.209023
FC-MZUSP	Laemolyta orinocensis	99876	1418.17	356.604	0.62404	1.60246	0.886125	0.00469332	0.000700049	0.284923	0.877437	0.988	0.270167	2.04456e-22	7.47372e-32	0.205616
FC-MZUSP	Laemolyta orinocensis	39207	1186.33	223.428	0.350076	2.85652	0.744786	0.0139452	0.033301	0.672963	0.988699	0.985816	0.114448	-2.65947e-20	4.49346e-31	0.31057
FC-MZUSP	Laemolyta orinocensis	41344	1717.95	229.436	0.176035	5.68067	0.683067	0.0132244	0.0329896	0.732097	0.993651	0.981176	0.225151	5.06943e-20	1.8253e-28	0.335488
FC-MZUSP	Laemolyta orinocensis	41902	1336.86	230.979	0.294628	3.39411	0.787587	0.0130483	0.0290732	0.67062	0.982317	0.981267	0.171479	4.59517e-20	1.38697e-28	0.31552
FC-MZUSP	Laemolyta orinocensis	45466	1739.53	240.602	0.188813	5.29625	0.700263	0.0120255	0.0234129	0.63386	0.954434	0.980333	0.149187	5.15511e-20	1.35339e-30	0.288687
FC-MZUSP	Laemolyta orinocensis	46784	1481.53	244.064	0.267848	3.73346	0.760332	0.0116867	0.0219462	0.639445	0.988699	0.985041	0.107087	-7.27452e-21	1.66308e-31	0.275586
FC-MZUSP	Laemolyta proxima	49063	1959.96	249.938	0.160498	6.23061	0.737213	0.0111438	0.021355	0.670036	0.877437	0.980883	0.185887	-1.08508e-19	2.46671e-30	0.282036
FC-MZUSP	Laemolyta proxima	51140	1830.27	255.173	0.191841	5.21265	0.629183	0.0106912	0.0183231	0.632723	0.999295	0.982208	0.170319	-5.76516e-21	4.68974e-31	0.272566
FC-MZUSP	Laemolyta proxima	1062	133.255	36.772	0.751568	1.33055	0.951613	0.514831	47.9219	0.703986	0.999295	0.985932	0.12191	-2.67862e-19	1.17425e-28	0.209541
FC-MZUSP	Laemolyta proxima	3064	517.213	62.4596	0.143933	6.94769	0.3198	0.178443	6.05821	0.74215	0.999295	0.987776	0.10216	1.39631e-18	4.48506e-26	1.06563
FC-MZUSP	Laemolyta proxima	8269	510.09	102.608	0.399364	2.50398	0.891248	0.0661204	0.741424	0.656698	0.993651	0.979401	0.143694	-9.34656e-20	-4.12199e-30	0.38565
FC-MZUSP	Laemolyta proxima	12834	578.392	127.831	0.482089	2.0743	0.869218	0.0426017	0.292333	0.63076	0.999295	0.98183	0.143665	-2.40173e-19	1.36196e-28	0.366872
FC-MZUSP	Laemolyta proxima	24729	951.11	177.443	0.343522	2.91102	0.789257	0.0221097	0.0948314	0.756575	0.928362	0.988596	0.0616281	1.29812e-18	1.15764e-27	0.392932
FC-MZUSP	Laemolyta proxima	26731	1089.16	184.486	0.283167	3.53148	0.659	0.0204538	0.0855457	0.790969	0.999295	0.986856	0.128427	-3.71706e-22	-1.97716e-30	0.427791
FC-MZUSP	Laemolyta proxima	31753	1093.58	201.07	0.333653	2.99712	0.785674	0.0172188	0.0550176	0.725071	0.999295	0.988348	0.0811779	-5.188e-20	8.86306e-30	0.379445
FC-MZUSP	Laemolyta proxima	32074	1072.75	202.084	0.350241	2.85518	0.781816	0.0170465	0.0521334	0.707417	0.999295	0.988049	0.105411	3.4846e-20	1.66105e-28	0.311509
FC-MZUSP	Laemolyta proxima	35240	1499.33	211.823	0.196995	5.07628	0.766537	0.015515	0.0459727	0.741621	1	0.986248	0.110424	1.72764e-20	1.11969e-31	0.266217
FC-MZUSP	Laemolyta proxima	44834	1786.96	238.923	0.176435	5.6678	0.696721	0.012195	0.0257458	0.678295	0.993651	0.98125	0.166337	4.28872e-19	8.48589e-28	0.245364
FC-MZUSP	Laemolyta proxima	45222	1603.4	239.955	0.221042	4.52402	0.657	0.0120904	0.0226134	0.612315	0.999295	0.982944	0.156978	6.28992e-20	7.26559e-29	0.288051
FC-MZUSP	Laemolyta proxima	46585	1325.23	243.544	0.333327	3.00006	0.8841	0.0117366	0.0186702	0.501003	0.993651	0.94738	0.448011	3.99697e-19	-1.05702e-27	0.321308
FC-MZUSP	Laemolyta proxima	65266	2278.16	288.269	0.158026	6.32808	0.739315	0.00837726	0.0106835	0.584618	0.988699	0.967795	0.339377	1.73951e-20	4.107e-29	0.221385
FC-MZUSP	Laemolyta proxima	69202	1737.82	296.835	0.287951	3.47281	0.856121	0.00677365	0.0047069	0.43655	0.982317	0.972019	0.16665	-3.94467e-19	-1.02114e-28	0.214877
FC-MZUSP	Laemolyta proxima	71389	2026.33	301.488	0.218485	4.57698	0.768632	0.00656614	0.00460712	0.436697	0.999295	0.971723	0.194754	3.57256e-19	1.00734e-27	0.233987
FC-MZUSP	Laemolyta proxima	1844	172.024	48.4547	0.783052	1.27705	0.949048	0.296502	15.7053	0.696313	0.982317	0.984254	0.166266	-2.40125e-18	1.0918e-28	0.181195
FC-MZUSP	Leporinus aff. Megalepis	2119	175.397	51.9422	0.865559	1.15532	0.981473	0.258023	11.7978	0.686104	0.99718	0.978863	0.222423	8.28705e-19	8.56981e-26	0.172041
FC-MZUSP	Leporinus aff. Megalepis	40863	1536.88	228.097	0.2174	4.59982	0.650364	0.0133801	0.0351515	0.756363	0.999295	0.98102	0.198977	-7.39311e-19	8.03489e-29	0.29982
FC-MZUSP	Leporinus aff. Megalepis	49440	1520.48	250.896	0.268737	3.72111	0.774351	0.0110589	0.0215508	0.680564	0.999295	0.975968	0.232907	7.94651e-19	-4.2677e-27	0.250156
FC-MZUSP	Leporinus aff. Megalepis	57978	1867.7	271.698	0.208861	4.78787	0.753352	0.00808496	0.00888145	0.539207	1	0.97771	0.151136	2.205e-18	9.57601e-27	0.239976
FC-MZUSP	Leporinus aff. Megalepis	64360	1492.18	286.262	0.363231	2.75307	0.896254	0.00728325	0.00595198	0.467751	0.974489	0.979686	0.118513	2.7989e-20	9.6511e-30	0.218826
FC-MZUSP	Leporinus aff. Megalepis	2635	199.782	57.9222	0.829619	1.20537	0.964142	0.207495	8.6429	0.782578	0.99718	0.989971	0.0909742	-5.77548e-19	-1.64183e-29	0.16782
FC-MZUSP	Leporinus aff. Megalepis	26897	1042.65	185.058	0.310912	3.21634	0.775308	0.0203275	0.0830474	0.783613	0.988699	0.990632	0.0911174	-1.3023e-21	2.91206e-31	0.315744
FC-MZUSP	Leporinus aff. Megalepis	27955	1337.3	188.662	0.196432	5.09083	0.727313	0.0195582	0.0797713	0.811246	0.99718	0.990593	0.109192	-6.40878e-20	7.05915e-29	0.378551
FC-MZUSP	Leporinus aff. Megalepis	28760	947.252	191.359	0.40278	2.48275	0.826508	0.0190108	0.0731066	0.787485	0.99718	0.989386	0.117356	-6.06992e-20	-2.3429e-30	0.320673
FC-MZUSP	Leporinus aff. Megalepis	31133	1154.99	199.097	0.293274	3.40979	0.747653	0.0175618	0.0594069	0.749416	0.965202	0.985894	0.111483	-1.10368e-17	-5.0913e-27	0.425147
FC-MZUSP	Leporinus aff. Megalepis	33478	1198.06	206.459	0.293096	3.41185	0.815582	0.0163316	0.0520251	0.758463	0.988699	0.987586	0.154901	4.5034e-20	1.45142e-28	0.291264
FC-MZUSP	Leporinus aff. Megalepis	35125	1528.44	211.477	0.188943	5.2926	0.720542	0.0155658	0.0494187	0.795346	0.954434	0.988475	0.103184	1.92608e-20	6.60273e-28	0.329645
FC-MZUSP	Leporinus aff. Megalepis	35543	1394.13	212.732	0.229804	4.35153	0.663388	0.0153828	0.0448147	0.743613	0.99718	0.98717	0.116589	-2.61518e-19	1.94119e-27	0.369609
FC-MZUSP	Leporinus aff. Megalepis	36672	1351.83	216.084	0.252175	3.9655	0.76094	0.0149092	0.0431836	0.755066	0.965202	0.986579	0.133267	-5.68739e-20	2.6409e-29	0.317142
FC-MZUSP	Leporinus aff. Megalepis	37928	1637.61	219.753	0.177725	5.62666	0.656262	0.0144155	0.0407002	0.760868	0.982317	0.986027	0.155324	5.35885e-20	3.17197e-29	0.393783
FC-MZUSP	Leporinus aff. Megalepis	38136	1261.69	220.355	0.301053	3.32168	0.743435	0.0143368	0.039933	0.755342	0.988699	0.987033	0.135602	-1.9285e-20	-5.04582e-30	0.331683
FC-MZUSP	Leporinus aff. Megalepis	42137	1509.78	231.626	0.2323	4.30478	0.750116	0.0129755	0.03036	0.703071	0.999295	0.984549	0.145355	3.21212e-20	4.53123e-31	0.304351
FC-MZUSP	Leporinus affinis	46098	1949.9	242.268	0.152359	6.56346	0.634661	0.0118606	0.0235666	0.642821	0.954434	0.972505	0.231703	2.11543e-25	-6.4197e-31	0.322852
FC-MZUSP	Leporinus affinis	54933	1814.63	264.467	0.209636	4.77017	0.70789	0.00853312	0.0101125	0.53922	0.928362	0.969821	0.164177	-9.27654e-18	-8.76188e-27	0.25459
FC-MZUSP	Leporinus affinis	55772	1523.49	266.479	0.301956	3.31174	0.845825	0.00840476	0.00813055	0.478495	0.974489	0.977074	0.109992	-9.7658e-20	5.73967e-30	0.214049
FC-MZUSP	Leporinus affinis	7753	526.877	99.3551	0.350963	2.84931	0.775455	0.0705211	0.860206	0.678268	0.974489	0.975457	0.180989	-9.24734e-19	5.60248e-28	0.244003
FC-MZUSP	Leporinus affinis	11296	851.37	119.927	0.195839	5.10625	0.656401	0.0484021	0.405598	0.675526	0.942163	0.981523	0.148098	4.05514e-19	2.66526e-28	0.403817
FC-MZUSP	Leporinus affinis	11601	607.813	121.535	0.394607	2.53417	0.772422	0.0471296	0.421909	0.735539	0.982317	0.982384	0.178268	-2.49222e-18	5.43453e-27	0.231564
FC-MZUSP	Leporinus affinis	18590	1001.14	153.849	0.233075	4.29046	0.834343	0.029411	0.136046	0.615758	0.942163	0.976172	0.210321	3.80187e-22	2.16121e-29	0.592575
FC-MZUSP	Leporinus affinis	31650	1179.46	200.744	0.285902	3.4977	0.840727	0.0172749	0.0461714	0.601258	0.896038	0.971098	0.272593	3.47785e-21	3.45699e-29	0.288869
FC-MZUSP	Leporinus affinis	34962	1296.45	210.986	0.261391	3.82568	0.640271	0.0156384	0.0463039	0.735824	0.993651	0.98339	0.174888	-1.17212e-20	9.67081e-30	0.366006
FC-MZUSP	Leporinus affinis	36073	1481.02	214.312	0.206666	4.83873	0.640501	0.0151568	0.0441499	0.744575	1	0.982335	0.176105	-3.73941e-19	4.729e-29	0.333313
FC-MZUSP	Leporinus affinis	38353	1683.45	220.981	0.170063	5.88019	0.661943	0.0142557	0.0394529	0.753384	0.954434	0.984221	0.164633	-1.5777e-19	-6.34256e-29	0.300348
FC-MZUSP	Leporinus affinis	38761	1098.43	222.153	0.403701	2.47708	0.736257	0.0141057	0.0370008	0.720557	0.999295	0.981535	0.200324	7.447e-20	2.01227e-28	0.306107
FC-MZUSP	Leporinus affinis	38780	1442.66	222.208	0.234149	4.27079	0.704387	0.0140988	0.0371756	0.726186	0.999295	0.98241	0.153562	1.82542e-19	1.5988e-28	0.268256
FC-MZUSP	Leporinus affinis	40912	1352.13	228.234	0.281206	3.55611	0.697776	0.013364	0.0304947	0.664641	0.999295	0.978567	0.18689	-5.33453e-20	2.09728e-29	0.283352
FC-MZUSP	Leporinus affinis	42922	1418.98	233.773	0.267877	3.73305	0.755177	0.0127382	0.0287951	0.688867	0.974489	0.977327	0.22344	8.17068e-21	2.40624e-28	0.266976
FC-MZUSP	Leporinus affinis	43567	1358.05	235.523	0.296848	3.36873	0.714529	0.0125496	0.0274558	0.677746	0.99718	0.978761	0.258543	1.17947e-20	7.79575e-29	0.275617
FC-MZUSP	Leporinus affinis	45474	1804.59	240.623	0.175476	5.69879	0.683748	0.0120234	0.0262259	0.704518	0.974489	0.980043	0.217066	-4.29535e-19	1.75846e-28	0.277536
FC-MZUSP	Leporinus affinis	53956	2381.98	262.105	0.119501	8.36812	0.659754	0.0101333	0.0164621	0.625285	0.974489	0.973353	0.259173	-8.09633e-20	-2.21589e-28	0.279634
FC-MZUSP	Leporinus agassizi	61106	1840.08	278.931	0.226789	4.40939	0.760915	0.00894757	0.0121682	0.589918	0.965202	0.967922	0.337429	2.62126e-21	2.20604e-30	0.225111
FC-MZUSP	Leporinus agassizi	48251	1394.6	247.861	0.311759	3.20761	0.701802	0.0113314	0.0221973	0.674852	0.896038	0.981123	0.189496	-2.73681e-19	1.17066e-27	0.294277
FC-MZUSP	Leporinus agassizi	31341	1218	199.761	0.265476	3.76682	0.700561	0.0174452	0.0561702	0.716276	0.993651	0.983266	0.215448	-9.03767e-20	1.02443e-28	0.392432
FC-MZUSP	Leporinus agassizi	33784	1469.08	207.401	0.196713	5.08355	0.664895	0.0161837	0.0396359	0.585675	0.954434	0.972589	0.230364	5.53585e-19	7.97924e-28	0.273352
FC-MZUSP	Leporinus agassizi	47632	1548.26	246.266	0.2497	4.00481	0.807185	0.00984107	0.0129476	0.549049	0.988699	0.98202	0.0827235	1.08174e-21	3.60847e-30	0.217141
FC-MZUSP	Leporinus agassizi	47878	1745.51	246.901	0.19747	5.06405	0.727563	0.00979051	0.0186324	0.741545	0.993651	0.976169	0.183726	1.10288e-17	2.58647e-25	0.210643
FC-MZUSP	Leporinus agassizi	49344	1390.47	250.653	0.320719	3.118	0.87732	0.00949964	0.0119854	0.551579	0.942163	0.985576	0.112306	4.23618e-21	3.99696e-31	0.18268
FC-MZUSP	Leporinus agassizi	49980	1719.43	252.263	0.212442	4.70718	0.705215	0.0109394	0.0180544	0.585892	0.835116	0.972773	0.213815	2.2141e-20	1.30272e-29	0.270212
FC-MZUSP	Leporinus agassizi	51060	1654.9	254.974	0.234287	4.26827	0.715377	0.010708	0.016316	0.557869	0.954434	0.972691	0.233078	1.52731e-20	4.01288e-28	0.218872
FC-MZUSP	Leporinus agassizi	52572	1202.48	258.721	0.456885	2.18873	0.867883	0.00891634	0.0104436	0.536053	0.954434	0.979859	0.12782	1.32666e-22	-3.05321e-32	0.209959
FC-MZUSP	Leporinus agassizi	53709	2421.72	261.504	0.115083	8.6894	0.636536	0.0101799	0.016925	0.633927	0.965202	0.976234	0.295559	-1.67993e-19	-2.88371e-29	0.273417
FC-MZUSP	Leporinus agassizi	54029	2304.55	262.282	0.12784	7.82229	0.560345	0.0101196	0.0165089	0.624078	0.877437	0.97461	0.265855	-2.37365e-18	2.49554e-28	0.307261
FC-MZUSP	Leporinus agassizi	58827	1464.23	273.68	0.344801	2.90023	0.824496	0.00796828	0.0111346	0.66346	0.993651	0.968436	0.319499	-2.64042e-18	-1.19675e-26	0.20126
FC-MZUSP	Leporinus agassizi	59479	1739.69	275.193	0.246961	4.04922	0.759416	0.00788093	0.0111392	0.677508	0.99718	0.966983	0.286667	-3.05734e-18	-1.31171e-26	0.198974
FC-MZUSP	Leporinus agassizi	65831	2638.45	289.514	0.118834	8.41508	0.623482	0.00830536	0.00996234	0.563726	0.974489	0.970082	0.247329	-5.12134e-19	4.16928e-27	0.295861
FC-MZUSP	Leporinus agassizi	69295	3198.01	297.034	0.0851439	11.7448	0.653067	0.00789018	0.00894687	0.558633	0.928362	0.972654	0.268662	-2.39025e-19	1.52264e-28	0.288237
FC-MZUSP	Leporinus agassizi	3472	237.723	66.4883	0.772054	1.29525	0.949153	0.157474	4.42897	0.693073	0.974489	0.981738	0.179857	2.3446e-19	1.91655e-29	0.171364
FC-MZUSP	Leporinus agassizi	4236	365.681	73.4401	0.398071	2.51212	0.750931	0.129072	2.52951	0.594628	0.896038	0.976448	0.220188	-4.11537e-20	6.64478e-30	0.303247
FC-MZUSP	Leporinus agassizi	4775	371.12	77.9726	0.435667	2.29533	0.830579	0.114503	2.44287	0.723631	0.982317	0.985167	0.153361	2.38177e-21	6.5214e-29	0.276692
FC-MZUSP	Leporinus agassizi	7595	402.936	98.3375	0.587848	1.70112	0.851076	0.0719882	0.987917	0.742352	0.974489	0.98669	0.11293	3.40593e-18	1.53995e-27	0.229589
FC-MZUSP	Leporinus agassizi	31942	1228.39	201.668	0.266011	3.75924	0.772255	0.017117	0.0541754	0.718994	0.999295	0.984853	0.158331	-1.2027e-19	1.07394e-28	0.200678
FC-MZUSP	Leporinus agassizi	41979	1229.4	231.191	0.349024	2.86514	0.678865	0.0130244	0.0306923	0.702917	0.965202	0.984148	0.15962	1.15067e-19	2.1509e-28	0.271231
FC-MZUSP	Leporinus agassizi	46705	1667.63	243.858	0.211045	4.73832	0.731205	0.0117065	0.0225566	0.64403	0.928362	0.980323	0.192618	-2.92461e-19	1.66151e-30	0.275547
FC-MZUSP	Leporinus aguapeiensis	51917	1312.56	257.105	0.37869	2.64068	0.770911	0.0105312	0.0179201	0.628548	0.993651	0.980315	0.199135	4.57611e-20	7.11407e-29	0.222459
FC-MZUSP	Leporinus aguapeiensis	52912	1260.05	259.557	0.418785	2.38786	0.788825	0.0103332	0.0142479	0.527033	0.877437	0.973939	0.271397	-2.5912e-19	1.05763e-28	0.265778
FC-MZUSP	Leporinus aguapeiensis	55694	1872.56	266.293	0.199593	5.01019	0.729246	0.00981704	0.015398	0.617129	0.954434	0.97276	0.255134	-3.40919e-18	-9.55279e-29	0.24291
FC-MZUSP	Leporinus aguapeiensis	56269	1307.09	267.664	0.413877	2.41618	0.836614	0.00833052	0.00788278	0.47638	0.982317	0.979547	0.135472	3.80834e-21	-4.25366e-31	0.205542
FC-MZUSP	Leporinus aguapeiensis	59273	1745.32	274.716	0.244522	4.08961	0.744065	0.00790832	0.00719802	0.504925	0.974489	0.983068	0.112932	3.86932e-20	-5.95196e-31	0.211672
FC-MZUSP	Leporinus aguapeiensis	59854	1890.66	276.059	0.210414	4.75253	0.663033	0.00913473	0.0126095	0.588869	0.965202	0.977983	0.233966	-3.77019e-18	-7.02192e-28	0.268061
FC-MZUSP	Leporinus aguapeiensis	60505	1499.45	277.556	0.33817	2.95709	0.919068	0.00774729	0.00658454	0.457994	0.993651	0.976357	0.167352	5.54828e-21	5.96193e-31	0.206479
FC-MZUSP	Leporinus aguapeiensis	66417	1651.04	290.8	0.306178	3.26608	0.738763	0.00705768	0.0069299	0.53334	0.999295	0.968054	0.21249	-2.86149e-18	7.21912e-28	0.226008
FC-MZUSP	Leporinus aguapeiensis	67328	2648.5	292.788	0.120616	8.29077	0.626424	0.00812069	0.00947028	0.560616	0.988699	0.972964	0.214803	-6.78381e-20	6.84747e-30	0.249953
FC-MZUSP	Leporinus aguapeiensis	68199	1630.65	294.676	0.322305	3.10265	0.78469	0.00687327	0.00573463	0.47451	0.993651	0.971533	0.297327	3.35978e-19	3.44505e-28	0.224496
FC-MZUSP	Leporinus aguapeiensis	70427	2846.01	299.45	0.109264	9.15215	0.644039	0.00776336	0.00803591	0.519536	0.877437	0.964439	0.307861	-6.09051e-19	3.47939e-28	0.267967
FC-MZUSP	Leporinus aguapeiensis	71888	2393.28	302.54	0.157717	6.34046	0.714081	0.00760558	0.00758775	0.511837	0.942163	0.965738	0.261214	1.0771e-19	9.4562e-29	0.239335
FC-MZUSP	Leporinus amae	71903	2024.99	302.572	0.220349	4.53825	0.703786	0.00760399	0.00750486	0.512513	0.99718	0.966371	0.291778	-1.12208e-18	-2.92737e-28	0.261822
FC-MZUSP	Leporinus amae	75530	1459.28	310.109	0.445712	2.2436	0.840156	0.00620614	0.00461495	0.473915	0.999295	0.966906	0.273333	5.95576e-20	1.35305e-27	0.188607
FC-MZUSP	Leporinus amae	1067	135.598	36.8585	0.729236	1.3713	0.985226	0.512418	40.7579	0.61073	0.988699	0.979267	0.182199	9.69182e-20	2.07032e-29	0.218693
FC-MZUSP	Leporinus amae	3721	257.095	68.8311	0.707426	1.41358	0.917859	0.146936	3.59327	0.656461	0.993651	0.980132	0.160981	2.1683e-20	-6.78227e-30	0.174295
FC-MZUSP	Leporinus amae	35457	1520.87	212.474	0.192631	5.19128	0.618246	0.0132202	0.0324554	0.710342	0.942163	0.977322	0.226901	-1.77012e-17	-1.53596e-25	0.300224
FC-MZUSP	Leporinus amae	36663	1483.7	216.057	0.209288	4.77811	0.766191	0.0149129	0.042556	0.743608	0.999295	0.98757	0.139555	-1.23429e-20	5.43418e-27	0.292732
FC-MZUSP	Leporinus amae	39304	1526.67	223.704	0.211911	4.71895	0.726695	0.0139108	0.035819	0.72041	0.954434	0.984446	0.160966	-6.74557e-19	4.48871e-27	0.289252
FC-MZUSP	Leporinus amae	40015	1199.26	225.718	0.349628	2.86018	0.782843	0.0136636	0.0308198	0.64727	0.974489	0.980923	0.170219	-1.26437e-20	6.56982e-30	0.187924
FC-MZUSP	Leporinus amae	43081	1213.02	234.206	0.367928	2.71793	0.742302	0.0126912	0.0288429	0.701643	0.974489	0.98845	0.129415	-2.10617e-20	1.26459e-28	0.265103
FC-MZUSP	Leporinus amae	45074	1187.09	239.562	0.40195	2.48787	0.880438	0.0103996	0.0140989	0.531949	0.99718	0.982969	0.116809	4.33951e-20	5.16331e-31	0.186064
FC-MZUSP	Leporinus amae	47203	1541.63	245.154	0.249584	4.00666	0.74967	0.011583	0.0211574	0.61666	0.99718	0.976654	0.188737	9.27305e-19	2.19328e-29	0.267113
FC-MZUSP	Leporinus amae	47601	1320.65	246.186	0.342966	2.91574	0.785741	0.00984748	0.013826	0.575291	0.988699	0.987007	0.102373	9.18099e-20	-1.86968e-29	0.213186
FC-MZUSP	Leporinus amae	48297	1456.82	247.979	0.28597	3.49687	0.84191	0.0113206	0.0190439	0.578279	0.965202	0.973558	0.234582	1.31314e-19	7.87112e-29	0.242381
FC-MZUSP	Leporinus amae	48512	1782.58	248.53	0.19185	5.21241	0.750286	0.0112704	0.020715	0.639845	0.982317	0.977883	0.221707	5.01198e-20	9.65967e-30	0.232181
FC-MZUSP	Leporinus amae	49874	1283.18	251.995	0.380633	2.6272	0.762296	0.0109626	0.0192058	0.623934	0.974489	0.979835	0.14219	6.2076e-20	2.17371e-29	0.245264
FC-MZUSP	Leporinus amae	55333	1497.38	265.428	0.310122	3.22454	0.808702	0.00847144	0.00905244	0.522913	0.993651	0.978659	0.175071	-5.51818e-20	2.48166e-28	0.234591
FC-MZUSP	Leporinus amae	56591	1742.38	268.429	0.234246	4.26902	0.714244	0.00966143	0.0133802	0.554726	0.99718	0.969301	0.23918	1.08452e-19	2.63087e-29	0.252868
FC-MZUSP	Leporinus amae	59812	2076.81	275.962	0.174264	5.73843	0.758506	0.00783706	0.00943381	0.594987	0.99718	0.97607	0.216876	3.77411e-18	5.25005e-26	0.196045
FC-MZUSP	Leporinus amazonicus	65811	1910.14	289.47	0.226663	4.41185	0.776073	0.00830788	0.00980573	0.556531	0.982317	0.971392	0.242431	5.9613e-21	2.47929e-30	0.237945
FC-MZUSP	Leporinus amazonicus	68335	2014.95	294.969	0.211507	4.72797	0.803459	0.00685959	0.00773499	0.625891	0.982317	0.974038	0.219064	1.56814e-18	1.66085e-25	0.189687
FC-MZUSP	Leporinus amazonicus	6685	340.451	92.2584	0.724774	1.37974	0.979487	0.0817876	1.0308	0.607161	0.982317	0.984269	0.112658	4.53673e-19	1.26493e-27	0.184708
FC-MZUSP	Leporinus amazonicus	6879	421.664	93.5875	0.486186	2.05683	0.829895	0.079481	0.999458	0.617865	0.99718	0.9815	0.142548	5.21482e-20	1.15896e-29	0.186177
FC-MZUSP	Leporinus amazonicus	9074	436.35	107.487	0.598878	1.66979	0.980867	0.0602546	0.5589	0.607143	0.999295	0.984345	0.116604	-1.91195e-18	5.84088e-28	0.229092
FC-MZUSP	Leporinus amazonicus	34229	997.252	208.762	0.432508	2.31209	0.912165	0.0159733	0.0414935	0.636762	0.982317	0.983862	0.160723	4.34004e-20	-6.85497e-30	0.284297
FC-MZUSP	Leporinus amazonicus	36343	1101.86	215.112	0.376163	2.65842	0.776776	0.0150442	0.040647	0.711384	0.999295	0.988102	0.0909455	8.68977e-20	2.53852e-28	0.292002
FC-MZUSP	Leporinus amazonicus	38848	1296.87	222.402	0.290257	3.44522	0.838126	0.0140741	0.0338109	0.677544	0.999295	0.985957	0.120277	-1.79906e-19	4.26514e-31	0.290898
FC-MZUSP	Leporinus amazonicus	40141	1363.68	226.073	0.271253	3.6866	0.838297	0.0136207	0.0288384	0.623328	0.999295	0.987851	0.10993	-8.94508e-19	-5.56621e-29	0.278057
FC-MZUSP	Leporinus amazonicus	43163	1084.15	234.429	0.461472	2.16698	0.895015	0.0126671	0.0258281	0.637131	1	0.986941	0.153977	2.15634e-20	4.75918e-29	0.250407
FC-MZUSP	Leporinus amazonicus	43523	1535.33	235.404	0.232021	4.30995	0.751589	0.0125623	0.0213441	0.544214	0.928362	0.982509	0.137199	-5.12219e-19	-9.0089e-29	0.335625
FC-MZUSP	Leporinus amazonicus	45075	1507.74	239.565	0.249167	4.01338	0.684147	0.0121298	0.0245981	0.653182	0.974489	0.984871	0.192361	-9.06167e-19	5.15975e-29	0.275508
FC-MZUSP	Leporinus amazonicus	48637	1649.71	248.85	0.224575	4.45285	0.722818	0.0112414	0.0203915	0.635286	0.954434	0.985548	0.171851	4.84989e-21	1.14202e-30	0.276938
FC-MZUSP	Leporinus amazonicus	53799	1239.57	261.723	0.439989	2.27279	0.862454	0.00871299	0.00848726	0.468473	0.928362	0.982157	0.106449	2.77368e-21	-9.1385e-31	0.211937
FC-MZUSP	Leporinus amblyrhynchus	58160	1425.29	272.124	0.359771	2.77955	0.860037	0.00805966	0.00738556	0.479784	0.993651	0.975572	0.168137	1.84402e-22	3.97849e-32	0.197606
FC-MZUSP	Leporinus amblyrhynchus	58316	1497.48	272.489	0.326796	3.06001	0.814265	0.0080381	0.0084323	0.51621	1	0.973583	0.209173	-2.04136e-20	3.7706e-29	0.2047
FC-MZUSP	Leporinus amblyrhynchus	61739	1295.43	280.372	0.46232	2.163	0.88249	0.00759245	0.00556483	0.418658	0.928362	0.977906	0.137761	6.64602e-22	-6.81457e-31	0.201651
FC-MZUSP	Leporinus amblyrhynchus	68779	1628.33	295.926	0.325972	3.06774	0.826561	0.00681531	0.00602481	0.497006	0.99718	0.957682	0.375188	-2.5508e-20	5.11466e-29	0.183271
FC-MZUSP	Leporinus amblyrhynchus	70555	1799.97	299.722	0.273657	3.6542	0.796907	0.00664375	0.00623715	0.539192	0.99718	0.968926	0.240184	4.29074e-20	1.00423e-29	0.190357
FC-MZUSP	Leporinus amblyrhynchus	1066	135.841	36.8412	0.725952	1.3775	0.943363	0.512899	50.2915	0.745041	0.99718	0.985045	0.143894	1.1528e-21	1.47329e-30	0.228089
FC-MZUSP	Leporinus amblyrhynchus	1683	159.598	46.2911	0.830308	1.20437	0.986518	0.324866	20.056	0.73878	0.928362	0.984684	0.129236	5.55975e-17	3.58449e-23	0.177795
FC-MZUSP	Leporinus amblyrhynchus	3072	519.213	62.5411	0.143199	6.98329	0.318672	0.177979	5.77485	0.710042	0.965202	0.984064	0.151972	5.34894e-19	-7.37882e-28	1.06839
FC-MZUSP	Leporinus amblyrhynchus	6763	462.794	92.795	0.396802	2.52015	0.891276	0.0808443	1.26679	0.753668	0.988699	0.986607	0.083541	2.19538e-17	2.67156e-23	0.370266
FC-MZUSP	Leporinus amblyrhynchus	19728	679.044	158.488	0.537647	1.85996	0.867432	0.0237606	0.0668871	0.468625	1	0.972188	0.17137	2.84361e-17	1.29758e-25	0.186307
FC-MZUSP	Leporinus amblyrhynchus	27335	958.902	186.558	0.373578	2.67682	0.806675	0.0171483	0.0332043	0.447445	0.993651	0.970452	0.189173	1.6851e-17	1.48485e-25	0.366696
FC-MZUSP	Leporinus amblyrhynchus	28082	925.487	189.09	0.412	2.42719	0.83238	0.0166922	0.0297628	0.43128	0.999295	0.972106	0.163333	1.23377e-17	1.03781e-25	0.3446
FC-MZUSP	Leporinus amblyrhynchus	29208	1053.39	192.844	0.330777	3.02318	0.771739	0.0160487	0.0295588	0.453248	0.993651	0.969875	0.190033	1.75527e-17	1.4165e-25	0.406212
FC-MZUSP	Leporinus amblyrhynchus	29953	934.458	195.288	0.431053	2.3199	0.823066	0.0156495	0.0289265	0.469184	1	0.966619	0.213275	5.98072e-18	7.96202e-26	0.327099
FC-MZUSP	Leporinus amblyrhynchus	31874	1374.83	201.453	0.211908	4.71904	0.780021	0.0171535	0.0564375	0.743302	0.912999	0.984874	0.144453	-1.82945e-18	2.57827e-25	0.350677
FC-MZUSP	Leporinus amblyrhynchus	32396	1237.9	203.096	0.265661	3.7642	0.752713	0.0168771	0.0536817	0.733028	0.965202	0.985236	0.111247	8.35716e-19	-6.08015e-27	0.410545
FC-MZUSP	Leporinus amblyrhynchus	40984	1018.66	228.435	0.496326	2.01481	0.931285	0.0114374	0.0174482	0.544809	0.993651	0.979909	0.119073	3.0765e-18	-7.93488e-28	0.217922
FC-MZUSP	Leporinus amblyrhynchus	48463	1392.72	248.405	0.313971	3.18501	0.814231	0.00967233	0.0127154	0.553076	0.993651	0.980946	0.106424	1.06981e-18	2.85634e-29	0.225305
FC-MZUSP	Leporinus amblyrhynchus	51079	1283.81	255.021	0.389447	2.56774	0.866921	0.00917696	0.0103174	0.503626	0.999295	0.978858	0.117393	4.8427e-20	-9.60677e-30	0.236753
FC-MZUSP	Leporinus amblyrhynchus	51863	1400.77	256.971	0.332151	3.01068	0.797635	0.00903824	0.0103894	0.527248	0.954434	0.980234	0.108396	6.53924e-19	-1.75831e-28	0.244359
FC-MZUSP	Leporinus amblyrhynchus	54322	1374.42	262.992	0.361364	2.7673	0.7989	0.0086291	0.0083979	0.479088	0.988699	0.981853	0.0922139	3.88549e-20	1.82969e-30	0.248281
FC-MZUSP	Leporinus arcus	54825	1721.96	264.207	0.232349	4.30387	0.820549	0.00854993	0.00945823	0.531102	0.965202	0.980561	0.11086	1.97214e-18	1.17538e-28	0.211181
FC-MZUSP	Leporinus arcus	61930	1625.49	280.805	0.294537	3.39516	0.802389	0.00756903	0.00711388	0.506173	0.965202	0.976524	0.124394	2.12991e-19	7.15412e-29	0.239398
FC-MZUSP	Leporinus arcus	62156	1523.92	281.317	0.336332	2.97325	0.814317	0.00754151	0.00699908	0.500206	0.993651	0.977192	0.125706	2.4432e-19	1.10405e-28	0.242201
FC-MZUSP	Leporinus arcus	62930	1621.34	283.064	0.300831	3.32413	0.785133	0.00744875	0.00724349	0.526956	0.993651	0.978589	0.118404	5.8922e-19	4.6303e-28	0.249219
FC-MZUSP	Leporinus arcus	63547	2039.04	284.448	0.192067	5.20651	0.6681	0.00737643	0.00718352	0.507058	0.974489	0.966709	0.200201	6.94902e-19	1.47081e-25	0.297406
FC-MZUSP	Leporinus arcus	74196	2494.81	307.359	0.149802	6.67549	0.753886	0.00631773	0.00436596	0.434561	0.988699	0.970447	0.216767	7.56564e-18	1.14583e-25	0.234652
FC-MZUSP	Leporinus arcus	77280	1921.63	313.681	0.26299	3.80243	0.775211	0.00606561	0.00433894	0.466492	0.99718	0.965954	0.209582	1.13653e-17	6.73e-26	0.23268
FC-MZUSP	Leporinus arcus	85092	2744.27	329.154	0.141986	7.04295	0.789307	0.00550874	0.00337043	0.448175	0.999295	0.964598	0.224545	2.55703e-18	5.12941e-26	0.221936
FC-MZUSP	Leporinus arcus	3014	516.627	61.9479	0.141905	7.04696	0.3159	0.181403	5.08527	0.603339	0.974489	0.978118	0.2304	7.03482e-19	1.16492e-27	1.07985
FC-MZUSP	Leporinus arcus	35487	1336	212.564	0.249841	4.00255	0.639613	0.0132091	0.0312701	0.689964	0.974489	0.978424	0.176124	-1.97421e-17	7.66636e-26	0.29908
FC-MZUSP	Leporinus aripuanensis	36525	1519.93	215.65	0.19868	5.03322	0.681437	0.0128337	0.025213	0.594594	0.982317	0.974003	0.191646	-1.08479e-18	1.08738e-26	0.411254
FC-MZUSP	Leporinus aripuanensis	37154	1395.5	217.499	0.239748	4.17105	0.734109	0.0147158	0.0403188	0.725994	0.954434	0.986486	0.144338	-2.20346e-19	1.24613e-28	0.354393
FC-MZUSP	Leporinus aripuanensis	37286	1424.67	217.885	0.230847	4.33186	0.671844	0.0146637	0.0399725	0.724843	0.974489	0.986627	0.124438	-2.62293e-18	1.07427e-27	0.340724
FC-MZUSP	Leporinus aripuanensis	40481	1397.96	227.029	0.260298	3.84176	0.800748	0.0135063	0.0297783	0.639175	0.99718	0.982964	0.201534	1.47146e-18	9.26128e-28	0.348863
FC-MZUSP	Leporinus aripuanensis	54646	1369.48	263.775	0.36615	2.73112	0.80331	0.00857794	0.00857934	0.481346	1	0.977091	0.13345	-2.16089e-19	4.64977e-29	0.244682
FC-MZUSP	Leporinus aripuanensis	56573	1984.47	268.386	0.180522	5.53951	0.81255	0.00828575	0.00872051	0.513239	1	0.977285	0.173876	1.40576e-19	2.90252e-28	0.243879
FC-MZUSP	Leporinus aripuanensis	65951	2157.56	289.778	0.178035	5.61686	0.636347	0.00829025	0.00833463	0.502595	0.982317	0.978643	0.180717	1.0995e-19	3.21438e-28	0.29987
FC-MZUSP	Leporinus aripuanensis	67683	2285.46	293.559	0.162833	6.14125	0.729909	0.0080781	0.00927175	0.555942	0.982317	0.971309	0.255643	1.72881e-21	-8.84773e-32	0.25349
FC-MZUSP	Leporinus aripuanensis	81089	2325.59	321.319	0.18841	5.30756	0.794297	0.00674259	0.00624031	0.528276	0.99718	0.956435	0.463013	-9.76915e-22	3.97999e-29	0.22935
FC-MZUSP	Leporinus aripuanensis	1827	196.409	48.2308	0.595148	1.68025	0.954545	0.299261	12.8392	0.55319	0.99718	0.967404	0.256717	-2.06807e-19	1.10108e-29	0.278346
FC-MZUSP	Leporinus aripuanensis	32645	1263.52	203.875	0.256959	3.89168	0.725074	0.014359	0.0340057	0.637543	0.982317	0.976177	0.157611	-1.14144e-17	-3.01104e-26	0.329966
FC-MZUSP	Leporinus aripuanensis	54884	1856.39	264.349	0.200133	4.99669	0.766847	0.00854074	0.0102368	0.556092	0.99718	0.977775	0.150727	-8.39673e-20	1.7293e-28	0.230197
FC-MZUSP	Leporinus aripuanensis	55041	1291.11	264.727	0.414925	2.41007	0.840577	0.00851638	0.00869038	0.497547	0.982317	0.977923	0.142991	-7.3326e-21	2.15508e-30	0.220885
FC-MZUSP	Leporinus aripuanensis	55875	1267.46	266.725	0.437078	2.28792	0.846694	0.00978523	0.0133073	0.555552	0.974489	0.980323	0.155997	-1.2277e-20	-7.68328e-31	0.217066
FC-MZUSP	Leporinus aripuanensis	61860	1615.44	280.647	0.297877	3.35709	0.813819	0.00757759	0.00823165	0.552072	0.99718	0.966443	0.264645	-5.22139e-18	-3.38864e-27	0.211862
FC-MZUSP	Leporinus aripuanensis	1091	151.012	37.2707	0.601188	1.66337	0.978475	0.501146	37.4998	0.586149	0.993651	0.978452	0.195297	-1.85587e-20	2.11229e-29	0.28117
FC-MZUSP	Leporinus bahiensis	41012	1441.36	228.513	0.248071	4.0311	0.620369	0.0114296	0.0212048	0.630386	0.99718	0.974469	0.132022	-6.13218e-19	-8.8345e-29	0.288663
FC-MZUSP	Leporinus bahiensis	42556	1234.83	232.775	0.350715	2.85132	0.776654	0.0128478	0.0253576	0.602264	0.999295	0.981593	0.118845	3.401e-19	8.61408e-30	0.26914
FC-MZUSP	Leporinus bahiensis	56065	1626.41	267.178	0.266342	3.75457	0.727333	0.00836083	0.00868869	0.498536	0.988699	0.974853	0.124302	-1.62293e-18	-4.77464e-29	0.226532
FC-MZUSP	Leporinus bahiensis	68505	1248.15	295.336	0.552588	1.80967	0.917621	0.00798117	0.00706943	0.455483	0.988699	0.976027	0.205222	2.78426e-21	1.07599e-30	0.202741
FC-MZUSP	Leporinus bahiensis	69490	1551.89	297.452	0.362587	2.75796	0.832275	0.00786804	0.00715214	0.458297	0.78556	0.967716	0.28501	-5.71864e-20	1.17585e-28	0.217412
FC-MZUSP	Leporinus bahiensis	72527	1711.81	303.882	0.311027	3.21515	0.762615	0.00753857	0.0059615	0.427204	0.954434	0.968289	0.263728	-2.45197e-21	5.28098e-31	0.201574
FC-MZUSP	Leporinus bahiensis	77849	1873.57	314.834	0.278692	3.58819	0.775311	0.00702321	0.00526288	0.431543	0.835116	0.968647	0.284409	-1.71499e-21	4.50801e-32	0.215093
FC-MZUSP	Leporinus bahiensis	79801	1655.71	318.757	0.365805	2.7337	0.863236	0.00685142	0.00465235	0.405366	0.857148	0.960335	0.305362	-3.50782e-20	2.18717e-29	0.208273
FC-MZUSP	Leporinus bahiensis	24542	974.683	176.771	0.324633	3.0804	0.847562	0.0190999	0.0532974	0.574181	0.999295	0.979456	0.0895572	-1.69013e-22	1.46393e-30	0.306604
FC-MZUSP	Leporinus bahiensis	57568	1319.81	270.736	0.415304	2.40788	0.888039	0.00814254	0.00734529	0.454053	0.99718	0.975538	0.0811028	-2.01605e-20	-9.5041e-30	0.198929
FC-MZUSP	Leporinus bahiensis	58886	2155.03	273.817	0.159336	6.27603	0.706143	0.00928489	0.0131256	0.586747	0.912999	0.964346	0.372827	8.57724e-20	1.57959e-28	0.236385
FC-MZUSP	Leporinus bahiensis	59843	1975.29	276.033	0.192735	5.18846	0.760442	0.00913641	0.0110502	0.526523	1	0.971788	0.283134	7.08651e-19	7.80908e-28	0.219093
FC-MZUSP	Leporinus bahiensis	65734	1905.69	289.301	0.227454	4.39649	0.718255	0.00831761	0.00990763	0.558222	0.896038	0.974616	0.265855	-2.70945e-20	2.32109e-28	0.217079
FC-MZUSP	Leporinus bahiensis	75837	2359.81	310.739	0.171135	5.84335	0.682497	0.00720954	0.00595333	0.452109	0.974489	0.962441	0.300579	2.35806e-20	1.84279e-29	0.22783
FC-MZUSP	Leporinus bahiensis	58285	1412.38	272.417	0.367166	2.72356	0.797824	0.00804238	0.0063992	0.432756	0.954434	0.978324	0.11746	9.07455e-21	1.81736e-31	0.198076
FC-MZUSP	Leporinus bahiensis	63558	1779.14	284.472	0.252324	3.96315	0.732488	0.00737515	0.00591881	0.456365	0.993651	0.974722	0.153074	7.48971e-20	-2.16896e-29	0.210957
FC-MZUSP	Leporinus bahiensis	78826	1825.77	316.803	0.297158	3.36521	0.824195	0.00594664	0.00387183	0.437994	0.993651	0.96229	0.269774	6.78427e-21	2.42634e-28	0.190238
FC-MZUSP	Leporinus bahiensis	78994	2043.21	317.141	0.237782	4.20553	0.810145	0.00593399	0.00386396	0.428175	0.99718	0.964063	0.239415	8.67409e-20	4.83511e-30	0.200716
FC-MZUSP	Leporinus bahiensis	4160	365.238	72.7783	0.391879	2.55181	0.871387	0.13143	2.74719	0.61877	0.988699	0.976138	0.197416	-1.37321e-20	2.64424e-30	0.339162
FC-MZUSP	Leporinus bahiensis	46873	1680.5	244.296	0.208573	4.79449	0.725308	0.0100004	0.0184456	0.704795	0.982317	0.973855	0.2265	-1.0565e-17	1.10315e-26	0.22009
FC-MZUSP	Leporinus bistriatus	50065	1607.58	252.477	0.243442	4.10775	0.79467	0.00936283	0.0130386	0.582713	0.928362	0.973407	0.182072	-2.44594e-19	5.51783e-28	0.20729
FC-MZUSP	Leporinus bistriatus	53290	1314.33	260.482	0.387656	2.57961	0.82528	0.0102599	0.0160921	0.595592	0.993651	0.974967	0.256595	6.09347e-22	3.42411e-31	0.211625
FC-MZUSP	Leporinus bistriatus	54329	1381.9	263.009	0.357508	2.79714	0.820618	0.00862799	0.00993539	0.5322	0.99718	0.975391	0.167318	4.71112e-20	2.25473e-29	0.220495
FC-MZUSP	Leporinus bistriatus	59612	1325.01	275.5	0.426683	2.34366	0.887532	0.00786335	0.00726985	0.478573	0.999295	0.97113	0.183876	5.86484e-21	1.75851e-30	0.195837
FC-MZUSP	Leporinus bistriatus	36532	1116.48	215.671	0.368281	2.71532	0.911454	0.0149663	0.0246787	0.429269	0.999295	0.951886	0.367391	-1.10702e-19	1.51349e-28	0.282169
FC-MZUSP	Leporinus bistriatus	92129	2428.6	342.494	0.196288	5.09457	0.761636	0.00593461	0.00390417	0.439475	0.99718	0.964996	0.301588	-1.17452e-20	5.19399e-30	0.207284
FC-MZUSP	Leporinus bistriatus	98528	3061.36	354.189	0.132111	7.56938	0.745532	0.00554918	0.00354624	0.44817	0.974489	0.95111	0.393651	1.61825e-21	5.65894e-29	0.224933
FC-MZUSP	Leporinus bistriatus	100180	3262.84	357.146	0.11825	8.45668	0.804148	0.00545768	0.0033655	0.445007	0.988699	0.962376	0.329602	-1.19901e-20	9.30056e-31	0.205059
FC-MZUSP	Leporinus bistriatus	102872	3302.48	361.913	0.118529	8.43673	0.79713	0.00531486	0.00294003	0.422061	0.99718	0.953897	0.363023	9.69024e-21	2.40436e-28	0.206532
FC-MZUSP	Leporinus bistriatus	105283	2818.81	366.129	0.166508	6.00571	0.780076	0.00519315	0.00278991	0.411037	0.988699	0.950333	0.435228	-1.33726e-19	-9.45888e-30	0.21212
FC-MZUSP	Leporinus bistriatus	106265	3252.5	367.833	0.126231	7.922	0.782476	0.00514516	0.00264227	0.400897	1	0.949271	0.414225	-1.75563e-19	-5.41997e-29	0.210542
FC-MZUSP	Leporinus bistriatus	13475	624.86	130.984	0.433684	2.30583	0.856534	0.0405751	0.229963	0.537505	0.954434	0.965602	0.247708	-1.1322e-18	1.81458e-27	0.231279
FC-MZUSP	Leporinus bistriatus	28229	1083.96	189.584	0.30191	3.31225	0.702196	0.0193684	0.0732435	0.760666	0.99718	0.987832	0.063755	7.68097e-22	-2.67577e-30	0.371936
FC-MZUSP	Leporinus bistriatus	32211	1306.79	202.515	0.237029	4.21889	0.617447	0.0145525	0.0378944	0.695971	0.999295	0.985581	0.0644361	-1.83963e-19	-3.15276e-28	0.324344
FC-MZUSP	Leporinus bistriatus	52672	1332.81	258.967	0.37261	2.68377	0.806282	0.00889942	0.00953431	0.497811	0.988699	0.984398	0.0672013	4.88002e-21	1.05201e-28	0.236118
FC-MZUSP	Leporinus brunneus	59708	2391.98	275.722	0.131137	7.6256	0.718638	0.00915706	0.0125607	0.582119	0.982317	0.972809	0.149151	1.81962e-19	6.72063e-29	0.294253
FC-MZUSP	Leporinus brunneus	71937	2416.71	302.643	0.154779	6.46082	0.575353	0.0076004	0.00674966	0.467529	0.928362	0.959292	0.282805	5.58149e-22	1.61848e-30	0.320816
FC-MZUSP	Leporinus brunneus	77184	3381.85	313.486	0.0848066	11.7915	0.653515	0.00708372	0.00774421	0.586096	0.988699	0.964709	0.237755	4.22044e-19	4.0546e-28	0.246673
FC-MZUSP	Leporinus brunneus	85582	2727.36	330.101	0.144579	6.91662	0.693297	0.00638861	0.00558058	0.527541	0.988699	0.962137	0.274656	-3.41003e-18	-3.39071e-27	0.231954
FC-MZUSP	Leporinus brunneus	93573	3072.27	345.168	0.124578	8.02708	0.720108	0.00584303	0.00386649	0.442418	0.999295	0.961334	0.369225	-3.53007e-22	-8.73012e-31	0.23303
FC-MZUSP	Leporinus brunneus	100792	2607.11	358.235	0.186345	5.36638	0.798213	0.00542454	0.00311942	0.422358	0.99718	0.959865	0.346696	6.09362e-22	9.44336e-32	0.205616
FC-MZUSP	Leporinus brunneus	103714	2823.88	363.391	0.163438	6.11852	0.792042	0.00527171	0.0029548	0.415471	1	0.953945	0.384657	-2.87596e-20	-7.22943e-29	0.207064
FC-MZUSP	Leporinus brunneus	104077	3276.31	364.026	0.121841	8.20739	0.792949	0.00525332	0.00292797	0.418308	0.988699	0.955434	0.362887	-4.75427e-21	1.90912e-30	0.209262
FC-MZUSP	Leporinus brunneus	107494	2917.16	369.954	0.158736	6.29978	0.84098	0.00508633	0.00239327	0.375145	0.99718	0.958095	0.272536	1.73842e-21	-2.56775e-31	0.198453
FC-MZUSP	Leporinus brunneus	112337	3310.05	378.196	0.128844	7.76133	0.826494	0.00486705	0.00259366	0.425685	0.99718	0.948443	0.386798	4.94748e-20	3.67926e-28	0.201674
FC-MZUSP	Leporinus brunneus	115908	3452.94	384.16	0.122164	8.1857	0.844841	0.0047171	0.00214923	0.402231	0.99718	0.954104	0.242839	9.77627e-21	8.76346e-29	0.199182
FC-MZUSP	Leporinus brunneus	1079	136.669	37.0652	0.725924	1.37756	0.979129	0.506719	28.3566	0.436696	0.965202	0.964135	0.274255	7.36298e-21	4.82209e-30	0.21212
FC-MZUSP	Leporinus brunneus	92142	3308.64	342.518	0.105771	9.45436	0.708845	0.00593378	0.00392441	0.430972	0.974489	0.955778	0.304682	1.46238e-21	6.89679e-30	0.243457
FC-MZUSP	Leporinus brunneus	108434	2644.63	371.568	0.194826	5.1328	0.808503	0.00504224	0.00246927	0.392902	0.99718	0.951279	0.370342	4.26597e-21	-4.46698e-29	0.211252
FC-MZUSP	Leporinus brunneus	2922	212.569	60.9951	0.812629	1.23057	0.989837	0.187115	4.31574	0.476631	0.982317	0.964065	0.249828	-3.09684e-21	-3.22935e-29	0.175326
FC-MZUSP	Leporinus brunneus	7466	516.576	97.4988	0.351585	2.84427	0.793327	0.073232	0.618359	0.43891	0.965202	0.956206	0.340136	5.76544e-21	-1.43308e-29	0.215816
FC-MZUSP	Leporinus brunneus	9956	446.936	112.589	0.626331	1.5966	0.909889	0.0549166	0.448645	0.569228	0.982317	0.967257	0.15783	4.69837e-20	-5.05113e-29	0.198656
FC-MZUSP	Leporinus cf. Bleheri	62280	2544.49	281.598	0.12088	8.27264	0.691646	0.0087789	0.0095355	0.485046	0.99718	0.964218	0.21683	8.91769e-20	4.9427e-28	0.26789
FC-MZUSP	Leporinus cf. Bleheri	74021	2647.31	306.996	0.132725	7.53436	0.586249	0.00738642	0.00632047	0.456493	0.877437	0.959868	0.28829	-4.61186e-19	7.2056e-28	0.326047
FC-MZUSP	Leporinus cf. Bleheri	4376	279.397	74.6438	0.70444	1.41957	0.985586	0.124943	2.45619	0.613407	0.988699	0.978989	0.140407	-5.46896e-18	-1.11534e-26	0.228297
FC-MZUSP	Leporinus cf. Bleheri	39095	1608.07	223.108	0.189986	5.26355	0.631828	0.0139852	0.0350132	0.705579	0.982317	0.984397	0.102854	4.53943e-19	1.44696e-28	0.336932
FC-MZUSP	Leporinus cf. Bleheri	46254	1583.75	242.678	0.231732	4.31534	0.713433	0.0101343	0.0161479	0.61038	0.993651	0.976575	0.144511	-2.68971e-18	-2.55446e-27	0.233124
FC-MZUSP	Leporinus cf. Bleheri	50147	1779.73	252.684	0.19895	5.02638	0.728277	0.00934752	0.0137113	0.615323	0.99718	0.979598	0.147268	-5.56841e-18	1.02253e-27	0.234445
FC-MZUSP	Leporinus cf. Bleheri	50184	1581.99	252.777	0.251982	3.96854	0.738673	0.00934063	0.013577	0.602905	0.988699	0.97539	0.158279	-9.26858e-19	1.1129e-28	0.205724
FC-MZUSP	Leporinus cf. Bleheri	53694	1439.38	261.468	0.325677	3.07053	0.842893	0.00873003	0.0103101	0.533945	0.928362	0.972671	0.225297	-3.70691e-20	-2.7604e-30	0.198885
FC-MZUSP	Leporinus cf. Bleheri	14283	554.617	134.854	0.583502	1.71379	0.992357	0.0382798	0.1943	0.53449	0.728134	0.971351	0.234024	3.24237e-18	1.13646e-27	0.220016
FC-MZUSP	Leporinus cf. Bleheri	45048	1288.76	239.493	0.340833	2.93399	0.69831	0.0104056	0.00419272	0.288902	0.877437	0.990543	0.228363	6.01387e-22	2.5946e-31	0.391536
FC-MZUSP	Leporinus cf. Bleheri	47763	1938.82	246.604	0.159672	6.26284	0.506184	0.0114471	0.015894	0.471986	0.912999	0.964856	0.265654	-1.36045e-18	-4.03507e-27	0.432906
FC-MZUSP	Leporinus cf. Bleheri	47864	1155.69	246.865	0.450337	2.22056	0.757222	0.00979337	0.00309976	0.340798	0.835116	0.990755	0.200159	4.43319e-23	1.46034e-32	0.334453
FC-MZUSP	Leporinus cf. Bleheri	49251	1201.35	250.416	0.428834	2.3319	0.779239	0.00951757	0.00273435	0.335918	0.857148	0.990336	0.192373	8.82756e-24	3.12522e-33	0.32266
FC-MZUSP	Leporinus cf. Bleheri	74426	1724.08	307.835	0.314644	3.17819	0.771918	0.0062982	0.00228548	0.356034	0.696212	0.991215	0.205664	5.33788e-23	3.08409e-32	0.250328
FC-MZUSP	Leporinus cf. Bleheri	74682	1890.16	308.364	0.26268	3.80691	0.767086	0.00627661	0.00231288	0.365613	0.728134	0.992448	0.17929	-3.06518e-21	2.86508e-31	0.257285
FC-MZUSP	Leporinus cf. Trimaculatus	78058	1944.16	315.256	0.259515	3.85335	0.776318	0.00600515	0.00195656	0.349772	0.696212	0.991117	0.21726	-1.90204e-21	1.24623e-31	0.251043
FC-MZUSP	Leporinus cf. Trimaculatus	2560	199.64	57.092	0.807154	1.23892	0.987654	0.213574	7.81878	0.672302	0.999295	0.988973	0.105153	-2.52213e-19	3.27086e-28	0.176094
FC-MZUSP	Leporinus cf. Trimaculatus	30784	1063.05	197.978	0.342316	2.92128	0.717108	0.0177608	0.0591145	0.732096	0.99718	0.986148	0.0691186	3.31447e-19	2.223e-27	0.346359
FC-MZUSP	Leporinus cf. Trimaculatus	33901	1285.38	207.76	0.257847	3.87827	0.683543	0.0161278	0.0472967	0.711221	0.99718	0.987371	0.0748331	1.12945e-19	1.33412e-29	0.351897
FC-MZUSP	Leporinus cf. Trimaculatus	36374	1399.08	215.204	0.233515	4.28238	0.618911	0.0150313	0.0417914	0.72133	0.999295	0.990556	0.125584	2.14927e-19	1.79337e-28	0.285653
FC-MZUSP	Leporinus cf. Trimaculatus	37856	1613.79	219.544	0.182664	5.47454	0.568947	0.0144429	0.0379192	0.711262	0.988699	0.988678	0.0728137	1.91402e-19	-1.97214e-28	0.30485
FC-MZUSP	Leporinus cf. Trimaculatus	40445	1107.96	226.928	0.414023	2.41532	0.818576	0.0135184	0.0300664	0.640015	0.982317	0.983269	0.124073	1.21016e-20	1.02869e-27	0.2659
FC-MZUSP	Leporinus cf. Trimaculatus	41208	1241.65	229.058	0.335885	2.97721	0.892992	0.0113752	0.0180353	0.559677	0.993651	0.98094	0.11066	3.82185e-21	1.43593e-30	0.229944
FC-MZUSP	Leporinus cf. Trimaculatus	44180	1615.54	237.174	0.212715	4.70112	0.62853	0.0123755	0.0244099	0.625986	0.928362	0.985274	0.101451	2.13456e-20	2.2267e-30	0.287015
FC-MZUSP	Leporinus cf. Trimaculatus	51340	1427.49	255.672	0.316604	3.15852	0.820023	0.00913031	0.0114303	0.549275	0.993651	0.97937	0.131362	6.17778e-21	5.8021e-30	0.247573
FC-MZUSP	Leporinus cf. Trimaculatus	52533	1758.25	258.625	0.213542	4.68293	0.798337	0.00892296	0.010195	0.520597	0.857148	0.979534	0.118346	3.70325e-21	1.82056e-29	0.265056
FC-MZUSP	Leporinus cf. Trimaculatus	52772	1643.36	259.213	0.245555	4.07241	0.802714	0.00888255	0.0104363	0.529701	0.99718	0.977017	0.123158	2.73261e-22	9.58211e-31	0.222681
FC-MZUSP	Leporinus cf. Trimaculatus	53570	1567.92	261.166	0.273831	3.65188	0.82564	0.00875023	0.00986269	0.524237	0.99718	0.980216	0.124478	4.4448e-21	1.32437e-30	0.244112
FC-MZUSP	Leporinus conirostris	53864	1240.6	261.881	0.43979	2.27382	0.829685	0.00870247	0.0100292	0.528811	1	0.976735	0.15482	1.87816e-20	2.02356e-29	0.267723
FC-MZUSP	Leporinus conirostris	54319	1471.34	262.985	0.31531	3.17148	0.840071	0.00862958	0.00975465	0.51997	0.99718	0.973277	0.175288	1.83404e-20	5.12022e-30	0.239022
FC-MZUSP	Leporinus conirostris	56743	1535.8	268.789	0.302312	3.30784	0.869158	0.00826093	0.00840655	0.499616	0.999295	0.975788	0.130961	4.84775e-21	8.49049e-31	0.246703
FC-MZUSP	Leporinus conirostris	57448	1893.49	270.453	0.201353	4.9664	0.688817	0.0095173	0.0127248	0.555338	0.993651	0.977734	0.13692	-4.92727e-20	2.0143e-29	0.26859
FC-MZUSP	Leporinus conirostris	60191	1852.86	276.835	0.220322	4.53881	0.803018	0.00778771	0.00753778	0.502449	0.982317	0.975834	0.136082	-6.87384e-22	2.55152e-30	0.230871
FC-MZUSP	Leporinus conirostris	65641	2637.97	289.096	0.118535	8.43633	0.71047	0.00714112	0.00708541	0.536685	0.993651	0.968463	0.195664	4.41274e-18	8.89459e-28	0.22159
FC-MZUSP	Leporinus conirostris	67565	2258.77	293.303	0.166413	6.00914	0.731785	0.00693776	0.00738125	0.586246	0.965202	0.967764	0.194653	3.71401e-17	1.01012e-24	0.227584
FC-MZUSP	Leporinus conirostris	68944	2236.81	296.281	0.173161	5.77497	0.762849	0.006799	0.00541037	0.463385	0.942163	0.967423	0.159181	1.04567e-18	3.26913e-28	0.214859
FC-MZUSP	Leporinus conirostris	71108	2696.17	300.895	0.122923	8.13515	0.734109	0.00659209	0.00609214	0.540587	0.965202	0.969544	0.19949	2.13022e-17	4.19085e-25	0.233069
FC-MZUSP	Leporinus conirostris	71480	2381.27	301.681	0.158408	6.31283	0.768983	0.00655778	0.0054501	0.493734	0.993651	0.968558	0.173601	1.76962e-18	1.10387e-26	0.212915
FC-MZUSP	Leporinus conirostris	72538	1884.34	303.905	0.256719	3.89531	0.776854	0.00646213	0.00516254	0.477985	0.993651	0.964566	0.2199	2.87044e-19	1.68607e-28	0.207444
FC-MZUSP	Leporinus conirostris	73881	2167.55	306.705	0.197608	5.06053	0.782737	0.00634466	0.00587574	0.557396	0.982317	0.965569	0.227268	1.88293e-17	2.71681e-25	0.207926
FC-MZUSP	Leporinus conirostris	74604	2503.74	308.202	0.149552	6.68662	0.746391	0.00628318	0.00502933	0.488588	0.988699	0.963106	0.201019	3.81106e-18	9.44476e-26	0.212317
FC-MZUSP	Leporinus conirostris	4095	254.024	72.2075	0.797467	1.25397	0.966486	0.133516	2.42411	0.532427	0.965202	0.974577	0.188071	-2.56018e-19	4.53634e-29	0.170202
FC-MZUSP	Leporinus conirostris	4469	292.409	75.4328	0.656808	1.52252	0.89793	0.122343	2.578	0.680525	0.974489	0.981063	0.111763	-6.67959e-19	2.22472e-28	0.20508
FC-MZUSP	Leporinus conirostris	13393	613.647	130.585	0.446942	2.23743	0.876907	0.0349996	0.200987	0.637668	0.965202	0.980006	0.0958229	1.93149e-18	3.921e-26	0.229214
FC-MZUSP	Leporinus copelandii	29937	1164.04	195.236	0.277641	3.60178	0.625538	0.0182634	0.0612082	0.726725	0.993651	0.99049	0.053042	-2.39864e-19	7.03144e-27	0.549838
FC-MZUSP	Leporinus copelandii	33634	1338.73	206.94	0.235831	4.24032	0.691716	0.0162559	0.0480182	0.707568	0.993651	0.986044	0.0685028	8.479e-20	1.1353e-28	0.418106
FC-MZUSP	Leporinus copelandii	41751	1504.93	230.562	0.231655	4.31676	0.601452	0.0130955	0.0278226	0.630759	0.974489	0.979598	0.200216	1.05961e-18	2.21921e-27	0.35667
FC-MZUSP	Leporinus copelandii	48138	1920.2	247.571	0.164062	6.09527	0.67528	0.00973763	0.0146007	0.596151	0.965202	0.973619	0.123893	-1.67579e-18	7.32432e-28	0.238552
FC-MZUSP	Leporinus copelandii	49466	1745.04	250.962	0.204129	4.89885	0.646133	0.00947621	0.0151621	0.649281	0.982317	0.977386	0.112348	-1.02409e-17	1.46739e-26	0.244828
FC-MZUSP	Leporinus copelandii	50316	1294.77	253.109	0.377166	2.65135	0.82713	0.00931612	0.0107323	0.50932	0.988699	0.978552	0.107769	9.78158e-20	2.54864e-28	0.208793
FC-MZUSP	Leporinus copelandii	51365	1297.84	255.734	0.38321	2.60954	0.818748	0.00912586	0.0106457	0.513019	0.982317	0.976332	0.143642	-2.10355e-21	1.00729e-29	0.216811
FC-MZUSP	Leporinus copelandii	52671	1957.25	258.965	0.172778	5.78776	0.717657	0.00889958	0.0113442	0.56232	0.974489	0.9763	0.119181	-6.98264e-20	1.28176e-28	0.236313
FC-MZUSP	Leporinus copelandii	52850	1526.97	259.405	0.284834	3.51082	0.803509	0.00886944	0.0111884	0.55918	1	0.976756	0.124394	-2.12759e-19	2.30469e-29	0.201807
FC-MZUSP	Leporinus copelandii	54537	2049.68	263.512	0.163129	6.13012	0.729836	0.00859508	0.0120483	0.623691	0.999295	0.972647	0.139816	-2.23537e-18	2.0132e-27	0.220833
FC-MZUSP	Leporinus copelandii	55744	1818.86	266.412	0.211744	4.72269	0.76436	0.00840898	0.00871622	0.504762	0.988699	0.97664	0.10411	2.09166e-21	1.40939e-29	0.244562
FC-MZUSP	Leporinus copelandii	55844	1182.46	266.651	0.501897	1.99244	0.892091	0.00839392	0.00845365	0.48135	0.965202	0.969184	0.186165	-3.05639e-21	8.3958e-32	0.192703
FC-MZUSP	Leporinus copelandii	55941	1191.03	266.883	0.495561	2.01791	0.867208	0.00837936	0.00880922	0.508332	0.982317	0.975301	0.106182	1.40109e-19	6.96522e-28	0.211536
FC-MZUSP	Leporinus copelandii	57037	2657.54	269.484	0.101486	9.85356	0.578064	0.00958588	0.0140394	0.594905	0.928362	0.973553	0.213078	-1.04706e-18	1.57314e-28	0.323503
FC-MZUSP	Leporinus copelandii	59111	2153.82	274.34	0.160125	6.2451	0.73356	0.00793	0.00938823	0.572328	0.999295	0.970459	0.154043	-3.59589e-18	-4.90964e-27	0.217428
FC-MZUSP	Leporinus copelandii	59408	1764.25	275.028	0.239846	4.16934	0.721093	0.00789035	0.00876009	0.543243	0.999295	0.967904	0.161888	-2.47014e-19	2.92334e-29	0.211275
FC-MZUSP	Leporinus copelandii	60217	1631.29	276.895	0.284358	3.5167	0.845756	0.00778435	0.00701587	0.47278	0.999295	0.972448	0.178396	1.34216e-20	2.25488e-29	0.226335
FC-MZUSP	Leporinus cylindriformis	60676	1236.54	277.948	0.498666	2.00535	0.873539	0.00772546	0.00690628	0.471295	0.993651	0.97222	0.159582	-3.79304e-21	3.77047e-30	0.214729
FC-MZUSP	Leporinus cylindriformis	60901	1452.15	278.463	0.362922	2.75541	0.874688	0.00769692	0.00691513	0.481471	0.965202	0.974301	0.135773	-3.1736e-21	9.44411e-32	0.193271
FC-MZUSP	Leporinus cylindriformis	61618	1433.35	280.097	0.376887	2.65331	0.894947	0.00760735	0.00619691	0.468584	0.988699	0.974987	0.118396	-9.12122e-22	3.93859e-29	0.210492
FC-MZUSP	Leporinus cylindriformis	62024	1270.28	281.019	0.483025	2.07029	0.924931	0.00755756	0.00587323	0.441135	0.965202	0.974231	0.139749	9.27088e-22	1.40896e-30	0.203242
FC-MZUSP	Leporinus cylindriformis	63296	1222.93	283.885	0.531846	1.88024	0.937594	0.00740568	0.00579037	0.450576	0.988699	0.976003	0.142105	3.63645e-26	1.79079e-32	0.195974
FC-MZUSP	Leporinus cylindriformis	63788	1800.51	284.987	0.247261	4.04431	0.726954	0.00734856	0.00731289	0.519253	0.982317	0.969459	0.121487	-6.18866e-20	2.24548e-27	0.210932
FC-MZUSP	Leporinus cylindriformis	65360	2587.42	288.477	0.122684	8.15104	0.605578	0.00836521	0.00816293	0.458973	0.974489	0.96473	0.256266	-9.31073e-20	3.81052e-27	0.301025
FC-MZUSP	Leporinus cylindriformis	66165	2767.98	290.248	0.10852	9.21486	0.636575	0.00826343	0.00735612	0.435769	0.993651	0.975435	0.135702	7.47976e-20	3.10521e-29	0.311982
FC-MZUSP	Leporinus cylindriformis	68891	1959.75	296.167	0.225409	4.43639	0.763191	0.00680423	0.00624502	0.521735	0.965202	0.964064	0.236458	2.49252e-19	5.74083e-27	0.210395
FC-MZUSP	Leporinus cylindriformis	72394	2160.01	303.603	0.194985	5.12861	0.74653	0.00755242	0.00722416	0.497063	0.928362	0.972038	0.20124	4.2159e-21	3.36121e-28	0.260412
FC-MZUSP	Leporinus cylindriformis	73420	2746.49	305.747	0.122311	8.17585	0.590492	0.00744688	0.00667481	0.479317	0.954434	0.971589	0.228653	-2.54192e-18	-3.36259e-27	0.303777
FC-MZUSP	Leporinus cylindriformis	75793	1681.42	310.649	0.336889	2.96833	0.789354	0.00618461	0.00416258	0.423708	1	0.955672	0.213367	3.39339e-19	1.80789e-27	0.198699
FC-MZUSP	Leporinus desmotes	1288	206.468	40.4961	0.379682	2.63378	0.835821	0.363936	18.5363	0.539206	0.999295	0.966803	0.214077	7.20176e-20	2.14553e-28	0.415213
FC-MZUSP	Leporinus desmotes	1384	199.054	41.9781	0.43894	2.27822	0.846483	0.338692	15.0115	0.525826	1	0.970533	0.213275	1.11755e-21	3.4931e-30	0.387187
FC-MZUSP	Leporinus desmotes	8288	489.279	102.726	0.435057	2.29855	0.76606	0.0659689	0.72428	0.648234	0.857148	0.979672	0.126221	9.47505e-19	1.38505e-26	0.269894
FC-MZUSP	Leporinus desmotes	36868	1772.16	216.661	0.147521	6.7787	0.494521	0.0148299	0.0418221	0.742102	0.988699	0.985756	0.0676792	3.55394e-17	9.43701e-27	0.46819
FC-MZUSP	Leporinus desmotes	50103	2361.99	252.573	0.112854	8.86103	0.443468	0.0109125	0.0200133	0.666721	0.954434	0.97868	0.183459	2.68233e-18	1.05942e-26	0.417636
FC-MZUSP	Leporinus desmotes	50969	1820.01	254.746	0.193361	5.17169	0.764119	0.00919677	0.0121199	0.570451	0.896038	0.977544	0.0995322	-1.7217e-18	-1.15072e-28	0.217101
FC-MZUSP	Leporinus desmotes	54045	2397.74	262.321	0.11813	8.46524	0.621428	0.0101166	0.0163586	0.639234	0.993651	0.979064	0.105969	3.32134e-17	3.82599e-25	0.347591
FC-MZUSP	Leporinus desmotes	56258	1636.82	267.638	0.263873	3.7897	0.808026	0.00833215	0.00914038	0.527367	0.982317	0.975874	0.113651	-9.5073e-19	-2.25811e-28	0.209567
FC-MZUSP	Leporinus desmotes	57360	1751.75	270.246	0.234895	4.25722	0.732754	0.00817207	0.0103149	0.603117	0.99718	0.976596	0.136591	4.1892e-19	5.19318e-27	0.198864
FC-MZUSP	Leporinus desmotes	57608	1692.41	270.83	0.252743	3.95658	0.809374	0.00813689	0.00883655	0.539142	0.974489	0.976517	0.141069	-5.73192e-22	3.75997e-28	0.208554
FC-MZUSP	Leporinus desmotes	58851	1204.64	273.736	0.509622	1.96224	0.927664	0.00796503	0.00680805	0.468853	0.942163	0.976975	0.119649	-2.17267e-22	-8.84992e-32	0.203777
FC-MZUSP	Leporinus desmotes	59282	1371.15	274.737	0.396243	2.5237	0.869582	0.00790712	0.0069919	0.466242	0.965202	0.976597	0.124929	1.71335e-22	-5.07744e-32	0.214916
FC-MZUSP	Leporinus desmotes	61616	1460.42	280.093	0.363033	2.75457	0.883004	0.0076076	0.00621756	0.453834	0.974489	0.973668	0.154419	3.54707e-21	1.46964e-30	0.216602
FC-MZUSP	Leporinus desmotes	61796	1406.52	280.502	0.392533	2.54756	0.917181	0.00758544	0.00664733	0.472958	0.974489	0.97304	0.156157	1.19379e-20	1.16907e-29	0.218838
FC-MZUSP	Leporinus desmotes	62419	1957.53	281.912	0.204696	4.8853	0.773834	0.00750973	0.00788183	0.550494	0.974489	0.970362	0.213684	2.28322e-19	3.21517e-28	0.203402
FC-MZUSP	Leporinus desmotes	62607	1282.62	282.336	0.478227	2.09106	0.903159	0.00748718	0.00600481	0.455746	0.928362	0.97136	0.111662	-1.13493e-20	-3.04476e-30	0.19506
FC-MZUSP	Leporinus desmotes	62752	1618.65	282.663	0.300976	3.32252	0.90912	0.00746988	0.00660924	0.482753	0.99718	0.973455	0.173534	1.04951e-21	3.89097e-31	0.214162
FC-MZUSP	Leporinus desmotes	63356	1291.47	284.02	0.477341	2.09494	0.892049	0.00739867	0.00561541	0.447311	0.99718	0.974077	0.146383	-2.29387e-20	1.66634e-31	0.196233
FC-MZUSP	Leporinus desmotes	63751	1293.85	284.904	0.478548	2.08965	0.935149	0.00735283	0.00545162	0.438902	0.982317	0.9726	0.191696	-1.23544e-20	-9.28079e-31	0.207223
FC-MZUSP	Leporinus desmotes	68918	2012.46	296.225	0.213839	4.67641	0.809533	0.00680156	0.00607262	0.522943	1	0.968227	0.21741	9.97377e-20	7.28044e-29	0.190191
FC-MZUSP	Leporinus elongatus	2415	210.024	55.4515	0.687999	1.45349	0.904156	0.194099	5.3677	0.560711	0.999295	0.974313	0.124812	-2.27888e-20	1.16474e-29	0.184147
FC-MZUSP	Leporinus elongatus	45107	1669.12	239.65	0.203459	4.915	0.681622	0.010392	0.0169971	0.613943	0.993651	0.976363	0.105196	-2.04293e-19	2.31594e-28	0.258612
FC-MZUSP	Leporinus elongatus	46054	1324.39	242.152	0.329948	3.03078	0.750836	0.0101783	0.0147387	0.54693	0.988699	0.971368	0.139708	-1.7892e-18	3.14931e-29	0.293682
FC-MZUSP	Leporinus elongatus	46292	1179.38	242.777	0.418226	2.39105	0.870265	0.0101259	0.0126563	0.474467	0.99718	0.965023	0.153584	-4.28395e-21	-5.15192e-30	0.255281
FC-MZUSP	Leporinus elongatus	49120	1868.25	250.083	0.176846	5.65462	0.670864	0.00954296	0.0144858	0.613305	0.982317	0.972071	0.134937	9.17678e-20	1.20622e-27	0.246459
FC-MZUSP	Leporinus elongatus	54411	1600.73	263.208	0.266845	3.74749	0.774192	0.00861499	0.0104245	0.543016	0.999295	0.970911	0.161871	-1.08409e-18	1.41516e-30	0.21122
FC-MZUSP	Leporinus elongatus	54713	1554.57	263.937	0.284497	3.51497	0.759766	0.00856743	0.0111394	0.577643	0.974489	0.970228	0.130459	-2.3295e-18	2.05771e-28	0.230503
FC-MZUSP	Leporinus elongatus	55411	1194.6	265.615	0.487934	2.04946	0.883438	0.00845951	0.00721234	0.42949	0.942163	0.977481	0.0871846	-1.41386e-22	6.43584e-32	0.190272
FC-MZUSP	Leporinus elongatus	55905	1619.3	266.797	0.26792	3.73245	0.798153	0.00838476	0.00846835	0.483849	0.912999	0.972001	0.126199	-2.03692e-19	8.00265e-30	0.212228
FC-MZUSP	Leporinus elongatus	56959	1310.77	269.3	0.416602	2.40037	0.865573	0.0082296	0.00786348	0.474697	0.896038	0.971316	0.135622	2.47325e-20	1.97993e-29	0.208399
FC-MZUSP	Leporinus elongatus	58257	1301.64	272.351	0.432094	2.31431	0.888687	0.00804624	0.00745603	0.469876	0.99718	0.970868	0.0902757	2.70607e-21	5.43955e-30	0.201267
FC-MZUSP	Leporinus elongatus	58831	1954.81	273.69	0.193468	5.16881	0.662885	0.00929357	0.0135562	0.610402	0.993651	0.9772	0.181669	5.28484e-19	2.02328e-28	0.315662
FC-MZUSP	Leporinus elongatus	58861	1765.55	273.759	0.237289	4.21427	0.76602	0.00796368	0.00987048	0.58696	0.993651	0.966833	0.14152	-1.50517e-19	4.26626e-29	0.201524
FC-MZUSP	Leporinus elongatus	59252	1311.15	274.667	0.433119	2.30883	0.896386	0.00791113	0.00661473	0.435479	0.965202	0.971039	0.131763	1.73807e-21	2.99165e-30	0.206732
FC-MZUSP	Leporinus elongatus	59809	1190.24	275.955	0.530527	1.88492	0.901689	0.00783745	0.00616296	0.431373	0.965202	0.974548	0.103225	4.49746e-21	2.67767e-30	0.218699
FC-MZUSP	Leporinus fasciatus	60440	1220.3	277.407	0.510038	1.96064	0.936851	0.00775563	0.00650592	0.44716	1	0.968609	0.134219	1.45472e-20	4.28852e-30	0.211894
FC-MZUSP	Leporinus fasciatus	60708	1339.19	278.021	0.425373	2.35088	0.898898	0.00772139	0.00617167	0.439843	0.954434	0.973766	0.115589	2.34244e-21	3.02415e-30	0.204182
FC-MZUSP	Leporinus fasciatus	60875	1346.83	278.403	0.421722	2.37123	0.907593	0.00770021	0.00548148	0.396966	0.954434	0.972239	0.12	2.75686e-22	1.73587e-32	0.202507
FC-MZUSP	Leporinus fasciatus	62049	1907.71	281.075	0.21425	4.66745	0.744127	0.00755451	0.00717193	0.486596	0.999295	0.967272	0.163693	-7.08872e-19	-3.6252e-28	0.217036
FC-MZUSP	Leporinus fasciatus	62262	1673.7	281.557	0.279303	3.58034	0.713376	0.00752867	0.00661911	0.462906	0.99718	0.97138	0.176617	-2.12815e-19	1.39998e-29	0.226385
FC-MZUSP	Leporinus fasciatus	62970	1367.94	283.153	0.422874	2.36477	0.924642	0.00744402	0.00615422	0.46371	0.974489	0.970831	0.147168	-9.26026e-22	2.92947e-30	0.194076
FC-MZUSP	Leporinus fasciatus	64686	1557.7	286.986	0.335005	2.98503	0.810094	0.00724654	0.00707206	0.518194	0.999295	0.966189	0.231186	-2.72293e-18	-9.74256e-28	0.208368
FC-MZUSP	Leporinus fasciatus	65928	1179.1	289.728	0.595904	1.67812	0.950409	0.00711003	0.00373527	0.362316	0.993651	0.971915	0.122105	-4.0136e-22	2.40179e-31	0.216856
FC-MZUSP	Leporinus fasciatus	66412	1910.5	290.789	0.228646	4.37357	0.76523	0.00705821	0.00666118	0.503214	1	0.956731	0.283734	-9.39852e-19	-6.09906e-28	0.211426
FC-MZUSP	Leporinus fasciatus	66531	1366.77	291.05	0.447554	2.23437	0.899432	0.00704559	0.0042815	0.386092	0.954434	0.966076	0.138747	-3.06491e-22	1.48514e-31	0.201961
FC-MZUSP	Leporinus fasciatus	71727	2564.09	302.201	0.137096	7.29415	0.650213	0.00762265	0.00852303	0.569762	0.954434	0.967314	0.293253	-8.92438e-21	1.76912e-30	0.256861
FC-MZUSP	Leporinus fasciatus	89279	3219.39	337.155	0.108246	9.2382	0.671538	0.00612406	0.00464905	0.478751	1	0.963811	0.311621	1.81644e-18	5.63072e-27	0.265074
FC-MZUSP	Leporinus fasciatus	50087	1053.58	252.533	0.567024	1.76359	0.845036	0.010916	0.017832	0.592151	0.965202	0.983717	0.0974621	9.30921e-20	1.05028e-28	0.224026
FC-MZUSP	Leporinus fasciatus	51563	2029.83	256.227	0.157263	6.35877	0.670015	0.00909082	0.0139422	0.651642	0.974489	0.978961	0.101905	2.55704e-17	6.14544e-26	0.245375
FC-MZUSP	Leporinus fasciatus	53172	1936.25	260.194	0.178225	5.61089	0.748828	0.00881573	0.0113288	0.579774	0.999295	0.979169	0.115288	1.12634e-19	9.96175e-30	0.256068
FC-MZUSP	Leporinus fasciatus	53281	1119.76	260.46	0.533988	1.8727	0.856745	0.0102616	0.0152609	0.572724	0.982317	0.980311	0.12751	1.54474e-20	2.48493e-29	0.227662
FC-MZUSP	Leporinus fasciatus	55061	1178.15	264.775	0.498489	2.00606	0.867294	0.0099299	0.0140505	0.561059	0.982317	0.980377	0.131191	2.22117e-20	2.68289e-29	0.22521
FC-MZUSP	Leporinus fasciatus	55817	1143.09	266.587	0.536801	1.86289	0.887986	0.0097954	0.0141833	0.580657	0.954434	0.977645	0.154035	4.83081e-20	1.19576e-28	0.225516
FC-MZUSP	Leporinus fasciatus	56063	1369.28	267.173	0.37575	2.66134	0.776636	0.00975242	0.0142383	0.588325	0.999295	0.977622	0.147189	7.27295e-20	2.52872e-28	0.228797
FC-MZUSP	Leporinus fasciatus	56372	1277.31	267.909	0.43419	2.30314	0.881667	0.0083153	0.00817962	0.489132	0.954434	0.97723	0.139616	2.2184e-21	1.82333e-30	0.231677
FC-MZUSP	Leporinus fasciatus	57113	1311.2	269.664	0.417452	2.39548	0.829769	0.00957313	0.0125578	0.544814	0.982317	0.9793	0.139712	4.45519e-20	4.89517e-29	0.237509
FC-MZUSP	Leporinus fasciatus	57233	1106.49	269.947	0.587438	1.70231	0.890343	0.00955306	0.0123024	0.536323	0.982317	0.97796	0.148048	1.16866e-20	3.67294e-29	0.224088
FC-MZUSP	Leporinus fasciatus	57731	1391.11	271.119	0.374883	2.6675	0.889373	0.00811955	0.00812874	0.499112	0.988699	0.976865	0.150526	-3.06243e-20	7.01277e-29	0.222122
FC-MZUSP	Leporinus fasciatus	57936	1882.17	271.6	0.205513	4.86586	0.811201	0.00809082	0.00834307	0.512593	0.99718	0.975833	0.159783	1.9367e-19	1.43081e-28	0.23833
FC-MZUSP	Leporinus fasciatus	58297	2618.15	272.445	0.106873	9.35692	0.66629	0.00804072	0.0111384	0.670381	0.999295	0.978969	0.167218	6.0558e-17	2.02662e-25	0.256482
FC-MZUSP	Leporinus fasciatus	58674	1435.84	273.324	0.357639	2.79612	0.854708	0.00798906	0.00795568	0.504785	0.99718	0.97592	0.117343	2.42449e-20	4.91719e-29	0.234503
FC-MZUSP	Leporinus fasciatus	58897	1427.01	273.843	0.363454	2.75138	0.803035	0.00795881	0.00806002	0.513008	0.999295	0.975174	0.156023	7.73212e-20	6.91951e-29	0.251068
FC-MZUSP	Leporinus fasciatus	59052	2841.25	274.203	0.0919236	10.8786	0.716772	0.00793792	0.0106628	0.657538	0.982317	0.97532	0.211479	2.21439e-17	3.21843e-26	0.241873
FC-MZUSP	Leporinus fasciatus	59860	1363.25	276.073	0.404757	2.47062	0.887275	0.00783077	0.00730073	0.48538	0.988699	0.972243	0.163893	1.06289e-20	2.24803e-29	0.235555
FC-MZUSP	Leporinus fasciatus	60123	1775.18	276.678	0.239755	4.17092	0.815537	0.00779652	0.00807367	0.531494	0.928362	0.976672	0.151479	1.21785e-19	1.08246e-28	0.259899
FC-MZUSP	Leporinus fasciatus	60878	1462.47	278.41	0.357684	2.79577	0.891398	0.00769983	0.00726738	0.489006	0.99718	0.96884	0.223492	4.51442e-21	1.09137e-29	0.218856
FC-MZUSP	Leporinus fasciatus	61225	1347.54	279.203	0.423699	2.36016	0.90389	0.00765619	0.00666632	0.466376	0.99718	0.972285	0.177343	1.21941e-20	1.27905e-29	0.221492
FC-MZUSP	Leporinus fasciatus	61388	2425.84	279.574	0.13109	7.62837	0.711803	0.00763586	0.00912217	0.613151	0.988699	0.975015	0.180418	1.52289e-18	2.79291e-27	0.224379
FC-MZUSP	Leporinus fasciatus	62312	1521.54	281.67	0.338234	2.95653	0.876005	0.00752263	0.00626012	0.458918	0.988699	0.971734	0.157193	-2.14754e-20	8.8294e-31	0.224923
FC-MZUSP	Leporinus fasciatus	62403	1937.79	281.876	0.208834	4.7885	0.721722	0.00751166	0.0082553	0.565527	0.988699	0.972056	0.114971	1.1826e-18	1.28852e-27	0.220418
FC-MZUSP	Leporinus fasciatus	64240	1562.41	285.995	0.330692	3.02396	0.761715	0.00851105	0.00985734	0.534398	0.974489	0.972252	0.188293	1.19504e-19	4.26259e-28	0.232327
FC-MZUSP	Leporinus fasciatus	67052	2459.2	292.187	0.139327	7.17737	0.712538	0.00699084	0.00826671	0.634617	0.974489	0.964275	0.278722	2.28792e-18	1.12262e-25	0.22991
FC-MZUSP	Leporinus fasciatus	67807	2363.72	293.827	0.152507	6.55706	0.73684	0.006913	0.00729897	0.582274	0.993651	0.967528	0.18853	1.66321e-18	2.83397e-27	0.215133
FC-MZUSP	Leporinus frederici	74802	2405.11	308.611	0.162499	6.15387	0.75901	0.00626654	0.00566062	0.558827	0.993651	0.963012	0.263166	1.43155e-18	1.04576e-26	0.213664
FC-MZUSP	Leporinus frederici	77847	2471.36	314.83	0.16017	6.24337	0.789595	0.00602143	0.00500605	0.527274	0.99718	0.958496	0.247519	3.59906e-18	2.72603e-26	0.204207
FC-MZUSP	Leporinus frederici	79817	2294.81	318.789	0.190464	5.25033	0.76508	0.00587281	0.00512564	0.55333	0.965202	0.957428	0.234411	1.88239e-17	6.27238e-25	0.212784
FC-MZUSP	Leporinus frederici	37883	1008.29	219.623	0.468257	2.13558	0.752677	0.0144326	0.0388999	0.729622	0.965202	0.987356	0.126808	1.64247e-20	8.96664e-29	0.282026
FC-MZUSP	Leporinus frederici	40611	1490.9	227.393	0.229592	4.35555	0.750999	0.0134631	0.0326069	0.701323	0.99718	0.984398	0.185171	1.02231e-19	1.0061e-28	0.273526
FC-MZUSP	Leporinus frederici	54729	2277.73	263.976	0.132564	7.54355	0.479944	0.00856493	0.0108661	0.563469	0.99718	0.966716	0.215288	1.24195e-17	8.8308e-25	0.410587
FC-MZUSP	Leporinus frederici	56804	1512.22	268.933	0.312146	3.20363	0.816689	0.00825206	0.00786057	0.473767	0.928362	0.97467	0.147385	4.54636e-21	-2.37504e-30	0.233381
FC-MZUSP	Leporinus frederici	57286	1570.31	270.072	0.291938	3.42539	0.761215	0.00818263	0.0077668	0.477595	0.982317	0.974894	0.0966416	-9.0339e-22	-1.02137e-31	0.201007
FC-MZUSP	Leporinus frederici	57385	1527.88	270.305	0.308909	3.2372	0.891972	0.00816851	0.00807934	0.4934	0.965202	0.975884	0.131362	-2.77548e-21	1.68477e-31	0.241408
FC-MZUSP	Leporinus frederici	59228	2093.84	274.611	0.169765	5.8905	0.632913	0.00791433	0.00789517	0.502583	0.965202	0.973825	0.149282	2.33504e-18	2.95561e-27	0.309178
FC-MZUSP	Leporinus frederici	62124	1701.3	281.245	0.269716	3.7076	0.767171	0.00754539	0.00669182	0.472826	0.999295	0.974218	0.226216	-6.74016e-20	2.53717e-29	0.206134
FC-MZUSP	Leporinus frederici	62518	1481.78	282.135	0.357806	2.79481	0.827363	0.00749784	0.00560798	0.430243	0.928362	0.97668	0.116341	1.78773e-21	1.09485e-30	0.205279
FC-MZUSP	Leporinus frederici	63041	1139.85	283.313	0.609732	1.64006	0.965776	0.00743564	0.00421345	0.369102	0.965202	0.9797	0.0782122	-2.80532e-21	-2.34158e-31	0.227912
FC-MZUSP	Leporinus frederici	65458	1639.52	288.693	0.306013	3.26784	0.825854	0.00716108	0.00526795	0.413861	0.982317	0.972703	0.203116	1.37387e-20	1.25711e-30	0.193811
FC-MZUSP	Leporinus frederici	65495	1189.35	288.775	0.581838	1.71869	0.951381	0.00715703	0.00356497	0.358959	0.896038	0.982019	0.0789641	-3.5762e-22	-4.8321e-33	0.221596
FC-MZUSP	Leporinus frederici	65774	1374	289.389	0.437817	2.28406	0.928828	0.00712668	0.00510902	0.429817	0.965202	0.970033	0.158956	2.40877e-21	1.068e-30	0.204804
FC-MZUSP	Leporinus frederici	67028	1542.95	292.135	0.353804	2.82643	0.903525	0.00699335	0.00516367	0.445829	0.942163	0.974153	0.139348	-5.72609e-21	1.37161e-30	0.208582
FC-MZUSP	Leporinus frederici	68203	1453.49	294.684	0.405683	2.46498	0.900203	0.00687286	0.00432866	0.408294	0.896038	0.97038	0.170769	2.70314e-20	5.68914e-30	0.196348
FC-MZUSP	Leporinus friderici	69056	1339.55	296.521	0.483605	2.0678	0.84587	0.00678797	0.00386685	0.409095	0.965202	0.971975	0.146976	3.42357e-21	4.1401e-31	0.209382
FC-MZUSP	Leporinus friderici	70126	2177.61	298.81	0.185836	5.3811	0.762397	0.0066844	0.00503915	0.456442	0.99718	0.967385	0.122581	-4.55117e-22	1.18711e-29	0.208872
FC-MZUSP	Leporinus friderici	71022	1371.03	300.713	0.4748	2.10615	0.926878	0.00660007	0.00384612	0.409809	0.928362	0.973391	0.141955	-2.36799e-20	1.52704e-30	0.204934
FC-MZUSP	Leporinus friderici	73491	1893.1	305.895	0.25769	3.88064	0.803373	0.00637833	0.00510107	0.488286	1	0.96213	0.25345	6.94128e-20	9.10955e-29	0.215901
FC-MZUSP	Leporinus friderici	74048	1729.22	307.052	0.311189	3.21348	0.848056	0.00633035	0.00460684	0.455782	0.965202	0.961981	0.268989	3.62474e-19	6.41863e-28	0.207454
FC-MZUSP	Leporinus friderici	77018	2003.1	313.149	0.241211	4.14575	0.786725	0.00608624	0.00349483	0.388429	0.988699	0.966956	0.145163	2.17765e-20	2.08244e-28	0.20091
FC-MZUSP	Leporinus friderici	77390	1960.11	313.904	0.253124	3.95064	0.792403	0.00605698	0.00550843	0.555386	0.99718	0.955628	0.241571	1.73521e-17	3.60267e-25	0.206745
FC-MZUSP	Leporinus friderici	78134	1593.09	315.41	0.386873	2.58483	0.836624	0.00599931	0.00364867	0.412596	0.99718	0.953647	0.337368	3.20875e-20	1.80612e-28	0.210515
FC-MZUSP	Leporinus friderici	88094	2490.92	334.91	0.178417	5.60486	0.827593	0.00532102	0.00305397	0.413764	0.999295	0.953133	0.184921	8.21385e-18	1.35046e-25	0.189499
FC-MZUSP	Leporinus friderici	1240	142.083	39.7343	0.771873	1.29555	0.945122	0.440927	32.3111	0.646064	0.811278	0.976701	0.219286	1.10079e-19	4.63176e-28	0.193905
FC-MZUSP	Leporinus friderici	7500	541.99	97.7205	0.32084	3.11682	0.779626	0.0729	0.913677	0.665096	0.811278	0.975877	0.179736	-4.37894e-18	2.80522e-28	0.263648
FC-MZUSP	Leporinus friderici	8104	562.007	101.579	0.322423	3.10152	0.720996	0.0674667	0.543562	0.472329	0.912999	0.970924	0.228001	5.97833e-20	2.11543e-28	0.511795
FC-MZUSP	Leporinus friderici	58295	2113.83	272.44	0.163945	6.09959	0.703613	0.008041	0.00973261	0.585987	1	0.969315	0.193367	2.04968e-19	5.87148e-27	0.239565
FC-MZUSP	Leporinus friderici	59227	2032.44	274.609	0.180175	5.55015	0.708084	0.00791446	0.00948993	0.588969	0.974489	0.970458	0.209799	2.06318e-19	1.55974e-27	0.21221
FC-MZUSP	Leporinus friderici	59909	1795.18	276.186	0.233608	4.28067	0.793696	0.00782437	0.00720192	0.48329	0.982317	0.97378	0.142122	2.19822e-20	-2.06835e-30	0.227667
FC-MZUSP	Leporinus friderici	62101	1460.22	281.193	0.365991	2.73231	0.819026	0.00754819	0.00645791	0.468596	1	0.972919	0.158463	5.88569e-21	1.90534e-29	0.229093
FC-MZUSP	Leporinus friderici	62594	2769.49	282.307	0.102552	9.75117	0.557253	0.00873486	0.01153	0.587232	0.857148	0.974662	0.240691	5.9725e-20	9.08751e-28	0.344548
FC-MZUSP	Leporinus friderici	63847	2670.08	285.118	0.112538	8.88586	0.658971	0.00856344	0.0111997	0.59173	0.965202	0.973454	0.220439	3.01798e-18	7.44916e-27	0.31057
FC-MZUSP	Leporinus friderici	69972	2005.91	298.481	0.21853	4.57603	0.859712	0.00669911	0.00483235	0.465109	1	0.973419	0.158354	2.68979e-20	1.09688e-29	0.208917
FC-MZUSP	Leporinus friderici	70313	2448.53	299.208	0.147379	6.78523	0.685686	0.00777594	0.00885849	0.568592	0.954434	0.973321	0.215963	-1.93897e-19	-9.94105e-29	0.25175
FC-MZUSP	Leporinus friderici	76938	1738.45	312.986	0.319907	3.12591	0.755101	0.00710637	0.00697503	0.53304	0.954434	0.96231	0.332216	6.17826e-19	-2.24351e-29	0.241383
FC-MZUSP	Leporinus garmani	77673	1985.47	314.478	0.247602	4.03874	0.827233	0.00603492	0.00433791	0.460576	0.954434	0.956553	0.304353	1.04714e-18	3.64041e-27	0.207513
FC-MZUSP	Leporinus garmani	3607	264.125	67.7685	0.649737	1.53909	0.923451	0.15158	3.16867	0.547266	0.988699	0.98411	0.16522	-4.3075e-18	-3.18865e-27	0.189999
FC-MZUSP	Leporinus garmani	11921	914.434	123.2	0.179151	5.5819	0.702972	0.0458644	0.304349	0.5676	0.757878	0.975785	0.21388	1.76649e-19	3.07992e-28	0.847034
FC-MZUSP	Leporinus garmani	13350	926.627	130.375	0.19538	5.11822	0.936776	0.0409551	0.254768	0.591179	0.974489	0.982492	0.206432	-9.18084e-20	5.47711e-29	1.17998
FC-MZUSP	Leporinus garmani	17084	1002.68	147.486	0.213539	4.68298	0.884402	0.0320036	0.12784	0.490224	0.811278	0.961531	0.28433	3.99518e-21	1.04904e-29	0.844435
FC-MZUSP	Leporinus garmani	18951	945.314	155.336	0.266496	3.75241	0.989143	0.0288507	0.107355	0.515682	1	0.98681	0.125598	-9.64368e-20	6.36084e-31	0.826003
FC-MZUSP	Leporinus garmani	29791	1379.83	194.759	0.196628	5.08575	0.737	0.0157346	0.0373575	0.59384	0.988699	0.977064	0.183626	7.62955e-20	1.51151e-28	0.364178
FC-MZUSP	Leporinus garmani	33729	1212.26	207.232	0.288416	3.46722	0.879023	0.0162101	0.0453756	0.675008	0.99718	0.986212	0.0874653	1.09564e-18	4.59598e-29	0.273083
FC-MZUSP	Leporinus garmani	41173	1065.58	228.961	0.455672	2.19456	0.797741	0.0132793	0.0309489	0.686768	0.982317	0.987605	0.121896	1.51522e-19	6.63828e-28	0.286353
FC-MZUSP	Leporinus garmani	41483	1495.34	229.821	0.23313	4.28945	0.783526	0.0131801	0.0298449	0.670652	0.993651	0.985245	0.125333	4.86562e-21	1.27829e-28	0.291103
FC-MZUSP	Leporinus garmani	43250	1037.78	234.665	0.504645	1.98159	0.866612	0.0126416	0.0270839	0.662932	0.99718	0.985119	0.138108	3.15881e-20	2.15938e-28	0.270335
FC-MZUSP	Leporinus garmani	51333	1270.52	255.654	0.399614	2.50241	0.91387	0.00913155	0.0112348	0.538493	0.99718	0.976881	0.15604	4.62358e-20	1.8327e-29	0.177789
FC-MZUSP	Leporinus garmani	53288	2042.89	260.477	0.160454	6.23232	0.687614	0.0102603	0.0166798	0.618453	0.99718	0.980293	0.152402	6.30074e-20	6.54224e-29	0.251377
FC-MZUSP	Leporinus garmani	56043	1550.57	267.126	0.292919	3.41392	0.737728	0.0097559	0.0125056	0.509162	0.99718	0.970607	0.219501	9.87711e-19	4.53238e-28	0.261988
FC-MZUSP	Leporinus geminis	13749	930.042	132.309	0.199745	5.00638	0.931504	0.0397665	0.203488	0.494749	0.877437	0.968194	0.261221	-9.96334e-21	8.09627e-29	1.15109
FC-MZUSP	Leporinus geminis	19418	963.983	157.238	0.262589	3.80824	0.971823	0.0281569	0.0988545	0.491041	0.877437	0.972534	0.204849	8.10034e-20	2.42779e-28	0.764286
FC-MZUSP	Leporinus geminis	19916	998.225	159.241	0.251162	3.98149	0.832992	0.0274528	0.0972599	0.503947	0.974489	0.979361	0.185536	1.07752e-20	-1.18427e-28	0.792232
FC-MZUSP	Leporinus geminis	69777	2125.01	298.065	0.194179	5.14989	0.649094	0.00783568	0.00946673	0.588962	0.988699	0.964722	0.374409	-2.74704e-18	7.04634e-27	0.266584
FC-MZUSP	Leporinus geminis	77287	2643.38	313.695	0.138994	7.19454	0.657773	0.00707428	0.00661889	0.513867	0.896038	0.967057	0.255177	1.25832e-19	9.70177e-29	0.252881
FC-MZUSP	Leporinus geminis	96772	3254.54	351.018	0.114811	8.71	0.693885	0.00564988	0.00350952	0.422101	0.974489	0.94869	0.417863	-1.23986e-19	5.6135e-28	0.24634
FC-MZUSP	Leporinus geminis	3495	243.782	66.7081	0.739017	1.35315	0.982293	0.156438	2.85956	0.462473	0.99718	0.965186	0.313963	-1.10089e-21	1.19086e-29	0.196138
FC-MZUSP	Leporinus geminis	64924	1836.58	287.513	0.241878	4.13432	0.78651	0.00842139	0.00872064	0.481179	0.942163	0.967277	0.321066	2.41152e-20	-5.1458e-30	0.224046
FC-MZUSP	Leporinus geminis	66237	2359.03	290.406	0.14957	6.68585	0.617761	0.00825445	0.00726669	0.412311	0.988699	0.960592	0.339435	5.59114e-19	2.31217e-27	0.333661
FC-MZUSP	Leporinus geminis	71598	2152.7	301.929	0.194152	5.1506	0.752048	0.00763639	0.00714581	0.478039	0.988699	0.969434	0.21292	1.14722e-20	-6.25594e-31	0.228813
FC-MZUSP	Leporinus geminis	72524	2084.1	303.876	0.209823	4.76591	0.711794	0.00753888	0.00647713	0.455356	0.965202	0.966452	0.339091	6.92439e-22	-4.81273e-32	0.236977
FC-MZUSP	Leporinus geminis	72587	2202.64	304.008	0.188011	5.31885	0.705249	0.00753234	0.00551361	0.387027	0.99718	0.961407	0.282132	1.36935e-19	1.43968e-29	0.266164
FC-MZUSP	Leporinus gomesi	77202	2733.75	313.523	0.129814	7.70333	0.662417	0.00708207	0.00656924	0.52041	0.982317	0.968484	0.314614	-1.25952e-18	-1.01777e-27	0.247611
FC-MZUSP	Leporinus gomesi	83019	2591.76	325.12	0.15531	6.43875	0.641207	0.00658584	0.00506544	0.466047	0.965202	0.969898	0.285855	1.34766e-20	6.88796e-28	0.260591
FC-MZUSP	Leporinus gomesi	84217	2709.16	327.458	0.144192	6.93519	0.740975	0.00649216	0.00496823	0.464577	0.988699	0.962785	0.374946	-3.11549e-22	4.81966e-32	0.23345
FC-MZUSP	Leporinus gomesi	86292	2271.87	331.467	0.210094	4.75977	0.759439	0.00633605	0.00447177	0.448035	0.988699	0.963834	0.32696	4.99652e-19	3.92025e-28	0.232127
FC-MZUSP	Leporinus gomesi	88982	2553.53	336.594	0.171486	5.83138	0.697395	0.0061445	0.00384524	0.40571	1	0.962925	0.356514	1.29214e-20	-6.4497e-32	0.235133
FC-MZUSP	Leporinus gomesi	96043	2463.37	349.694	0.198892	5.02785	0.739566	0.00569276	0.00337712	0.413798	0.99718	0.96125	0.373271	1.44727e-19	2.29939e-29	0.2251
FC-MZUSP	Leporinus gomesi	2950	261.924	61.2867	0.540358	1.85062	0.913879	0.185339	4.39262	0.505006	0.988699	0.967847	0.218498	1.62012e-20	1.98659e-30	0.194799
FC-MZUSP	Leporinus gomesi	9209	478.693	108.283	0.505019	1.98012	0.881075	0.0593713	0.447979	0.499476	0.999295	0.969978	0.197724	-1.50663e-18	2.32969e-28	0.229097
FC-MZUSP	Leporinus gomesi	9273	511.522	108.659	0.44535	2.24542	0.924803	0.0589615	0.520517	0.575176	0.993651	0.96849	0.241521	-3.69941e-19	-3.9782e-28	0.333716
FC-MZUSP	Leporinus gomesi	10052	590.735	113.131	0.361974	2.76263	0.735064	0.0543922	0.405521	0.533845	0.99718	0.973076	0.278322	1.98478e-20	1.58379e-29	0.283756
FC-MZUSP	Leporinus gomesi	58150	1664.94	272.101	0.26361	3.79348	0.738638	0.00940241	0.0112555	0.500733	0.993651	0.97043	0.257856	-8.67374e-21	9.47837e-31	0.222948
FC-MZUSP	Leporinus gomesi	58727	1942.72	273.448	0.195536	5.11415	0.79436	0.00931003	0.0124911	0.560925	0.988699	0.969828	0.246849	5.27991e-22	2.55692e-30	0.229621
FC-MZUSP	Leporinus gomesi	61050	1940.99	278.803	0.203634	4.91078	0.773794	0.00895577	0.0115165	0.564546	0.999295	0.975623	0.198963	-5.16273e-21	7.41597e-30	0.231063
FC-MZUSP	Leporinus granti	61289	1927.41	279.348	0.207322	4.82342	0.686419	0.00892085	0.0106796	0.531273	0.993651	0.97717	0.162528	4.60486e-19	8.92192e-29	0.275174
FC-MZUSP	Leporinus granti	63022	1731.95	283.27	0.264018	3.78762	0.706501	0.00867554	0.00981809	0.516909	0.988699	0.970552	0.258565	-6.67149e-20	-3.83119e-30	0.244553
FC-MZUSP	Leporinus granti	63937	1845.12	285.319	0.236001	4.23727	0.792663	0.00855139	0.00920447	0.502407	0.99718	0.97255	0.218849	-7.87785e-19	-8.1448e-29	0.239587
FC-MZUSP	Leporinus granti	70952	2296.7	300.564	0.16903	5.9161	0.70891	0.00770591	0.00701807	0.473939	0.988699	0.974055	0.250308	-2.32782e-19	-3.37856e-30	0.253293
FC-MZUSP	Leporinus granti	71850	2167.39	302.46	0.192204	5.20281	0.722961	0.0076096	0.00707715	0.483346	0.993651	0.967911	0.257519	-3.73347e-19	4.33583e-29	0.247277
FC-MZUSP	Leporinus granti	75469	1652.41	309.984	0.347332	2.87909	0.719376	0.0072447	0.00667392	0.49864	0.99718	0.96432	0.326187	-1.98693e-21	6.94079e-31	0.225661
FC-MZUSP	Leporinus granti	20086	978.09	159.92	0.263843	3.79013	0.691738	0.0272205	0.0885614	0.465264	0.835116	0.962739	0.394926	-1.85037e-21	1.11866e-30	0.591047
FC-MZUSP	Leporinus granti	69833	2427.72	298.185	0.148892	6.71627	0.699652	0.00782939	0.00776052	0.49817	0.912999	0.968949	0.241063	6.10762e-20	3.31216e-29	0.227019
FC-MZUSP	Leporinus granti	84681	2425.84	328.358	0.18083	5.53005	0.754188	0.00645658	0.00427726	0.407101	0.974489	0.964684	0.344161	4.30611e-22	2.21009e-31	0.226398
FC-MZUSP	Leporinus granti	87436	2944.59	333.657	0.126721	7.89134	0.706799	0.00625315	0.00421681	0.421333	0.928362	0.961265	0.320264	-1.26556e-22	9.82617e-31	0.230448
FC-MZUSP	Leporinus granti	1441	146.184	42.8338	0.847375	1.18012	0.983618	0.379424	19.2309	0.536521	1	0.98372	0.115687	4.1175e-22	2.54424e-32	0.174718
FC-MZUSP	Leporinus julli	3972	271.782	71.1147	0.675738	1.47986	0.941679	0.137651	2.69584	0.558737	0.974489	0.980243	0.196099	1.74246e-19	5.65445e-30	0.196142
FC-MZUSP	Leporinus julli	53209	1307.3	260.284	0.391241	2.55597	0.758828	0.0102755	0.0165051	0.61112	0.982317	0.97943	0.190449	1.69527e-20	1.17795e-29	0.235461
FC-MZUSP	Leporinus julli	55641	1393.73	266.166	0.359956	2.77812	0.813774	0.00982639	0.0135258	0.552054	0.982317	0.978563	0.209819	4.97054e-23	1.99551e-30	0.221572
FC-MZUSP	Leporinus julli	59945	1561.47	276.269	0.308956	3.2367	0.818708	0.00912086	0.0107766	0.512341	0.99718	0.975159	0.216193	3.82616e-22	-1.83954e-32	0.210485
FC-MZUSP	Leporinus julli	46205	1731.87	242.549	0.193584	5.16573	0.701926	0.010145	0.0171325	0.632638	0.99718	0.972833	0.131921	1.46912e-18	2.57715e-26	0.288141
FC-MZUSP	Leporinus julli	50161	2000.54	252.719	0.157501	6.34918	0.716535	0.00934491	0.0147904	0.650609	0.982317	0.975831	0.1268	6.16554e-19	3.84238e-26	0.235203
FC-MZUSP	Leporinus julli	51584	1218.34	256.279	0.436705	2.28988	0.832027	0.00908712	0.0112525	0.544661	1	0.977519	0.121637	1.27742e-20	5.96824e-28	0.231824
FC-MZUSP	Leporinus julli	52442	2080.08	258.401	0.152311	6.56553	0.718265	0.00893845	0.0116095	0.562814	0.988699	0.974186	0.166667	3.58494e-18	1.16265e-25	0.246555
FC-MZUSP	Leporinus julli	53789	1674.03	261.699	0.2412	4.14593	0.766192	0.00871461	0.0101808	0.522189	0.988699	0.972413	0.176157	1.35798e-17	1.77116e-25	0.230345
FC-MZUSP	Leporinus julli	54223	1607.5	262.752	0.263688	3.79236	0.719195	0.00864486	0.0122868	0.629501	1	0.972916	0.148438	5.54507e-18	2.04373e-25	0.257396
FC-MZUSP	Leporinus julli	56162	1398.24	267.409	0.360985	2.7702	0.845546	0.00834639	0.00852815	0.508566	0.993651	0.976419	0.0953968	4.25083e-20	5.34305e-29	0.203589
FC-MZUSP	Leporinus julli	57120	1219.9	269.68	0.482339	2.07323	0.908151	0.00820641	0.00780807	0.47038	0.965202	0.974411	0.14482	-4.39601e-22	-1.06414e-31	0.205973
FC-MZUSP	Leporinus julli	58027	2136.29	271.813	0.15978	6.25862	0.767411	0.00807814	0.0109169	0.640976	0.942163	0.975168	0.136909	4.7968e-18	3.0496e-26	0.237206
FC-MZUSP	Leporinus klausewitzi	59518	1921.83	275.283	0.202502	4.93822	0.709451	0.00787577	0.00868007	0.537038	0.988699	0.971	0.135297	7.18919e-20	1.65099e-27	0.243636
FC-MZUSP	Leporinus klausewitzi	60150	1406.47	276.741	0.382109	2.61705	0.823307	0.00779302	0.0078751	0.520527	0.99718	0.972517	0.126984	-9.07174e-20	3.37762e-28	0.207812
FC-MZUSP	Leporinus klausewitzi	60268	2030.68	277.012	0.18366	5.44486	0.772182	0.00777776	0.00798783	0.512606	0.988699	0.967642	0.149332	4.64132e-20	2.86524e-28	0.233506
FC-MZUSP	Leporinus klausewitzi	61785	1358.18	280.477	0.420899	2.37587	0.845073	0.00758679	0.0065971	0.490956	1	0.980169	0.104754	1.07853e-22	-2.52289e-30	0.206973
FC-MZUSP	Leporinus klausewitzi	63387	1368.64	284.089	0.425236	2.35163	0.894526	0.00739505	0.00619376	0.472645	0.993651	0.975176	0.128672	-2.36618e-19	-1.95028e-28	0.229947
FC-MZUSP	Leporinus klausewitzi	64747	1615.03	287.121	0.311937	3.20578	0.869834	0.00723972	0.00565434	0.460249	0.954434	0.975461	0.136759	8.37894e-20	1.12737e-28	0.207781
FC-MZUSP	Leporinus klausewitzi	65478	1696.23	288.737	0.28598	3.49675	0.835904	0.00715889	0.00672802	0.509636	0.974489	0.96397	0.188221	-1.58614e-18	-2.90377e-28	0.205755
FC-MZUSP	Leporinus klausewitzi	66573	1241.55	291.142	0.542728	1.84254	0.930375	0.00704114	0.00466768	0.405281	0.954434	0.971627	0.13538	1.65549e-23	-1.01638e-32	0.215654
FC-MZUSP	Leporinus klausewitzi	66990	1457.64	292.052	0.396206	2.52394	0.905013	0.00699731	0.00557344	0.475541	0.999295	0.970718	0.168655	2.47354e-21	-5.52904e-32	0.208658
FC-MZUSP	Leporinus klausewitzi	68063	1883.23	294.382	0.241165	4.14655	0.786619	0.006887	0.00721118	0.575635	0.999295	0.967551	0.238588	-2.36275e-20	3.49077e-28	0.193535
FC-MZUSP	Leporinus klausewitzi	69556	1539.44	297.593	0.368826	2.71131	0.884115	0.00673917	0.00469284	0.436903	0.993651	0.970191	0.158713	-7.75836e-21	1.11036e-29	0.198956
FC-MZUSP	Leporinus klausewitzi	70023	1909.5	298.59	0.24133	4.14371	0.737511	0.00669423	0.00572342	0.496095	0.993651	0.96838	0.233417	-5.46356e-18	5.50501e-27	0.230145
FC-MZUSP	Leporinus klausewitzi	70400	1364.14	299.393	0.475407	2.10346	0.94129	0.00665838	0.00374284	0.378623	0.928362	0.973377	0.138688	3.45373e-21	4.50788e-31	0.207028
FC-MZUSP	Leporinus klausewitzi	71083	1179.45	300.842	0.642125	1.55733	0.963028	0.0065944	0.00380616	0.387234	0.928362	0.968876	0.154319	1.08912e-21	4.28236e-30	0.207403
FC-MZUSP	Leporinus klausewitzi	8708	571.279	105.297	0.335298	2.98242	0.847329	0.0627871	0.534241	0.532983	0.965202	0.974536	0.182013	2.3127e-19	4.69802e-28	0.387926
FC-MZUSP	Leporinus klausewitzi	16376	809.387	144.397	0.314127	3.18342	0.803415	0.0333873	0.130984	0.461137	0.982317	0.964324	0.279095	6.63886e-22	1.06451e-29	0.251987
FC-MZUSP	Leporinus klausewitzi	26833	1154	184.837	0.253203	3.94939	0.719403	0.020376	0.0501144	0.47381	0.912999	0.968132	0.264358	-2.29732e-20	1.1956e-31	0.486988
FC-MZUSP	Leporinus klausewitzi	48791	1660.47	249.244	0.222375	4.4969	0.768907	0.0096073	0.0156781	0.649271	0.999295	0.972818	0.191462	-2.85099e-19	1.02575e-26	0.232642
FC-MZUSP	Leporinus klausewitzi	52261	1598.01	257.955	0.257174	3.88841	0.75921	0.0089694	0.0115449	0.563225	0.988699	0.975561	0.111437	-8.54932e-19	-5.03544e-28	0.217721
FC-MZUSP	Leporinus lacustris	61077	2031.92	278.865	0.185898	5.37929	0.756971	0.00895181	0.0119253	0.580066	0.877437	0.97081	0.23141	-1.00493e-19	-7.76285e-31	0.227666
FC-MZUSP	Leporinus lacustris	69085	1231.41	296.583	0.572516	1.74668	0.932598	0.00678512	0.00377128	0.404158	0.99718	0.976084	0.109858	9.94027e-23	1.85098e-31	0.204641
FC-MZUSP	Leporinus lacustris	74496	2125.63	307.979	0.207189	4.82652	0.743688	0.00733932	0.0069201	0.502942	0.954434	0.966723	0.351186	-8.18459e-21	6.60593e-32	0.222956
FC-MZUSP	Leporinus lacustris	75018	3081.25	309.056	0.0992939	10.0711	0.615134	0.00728825	0.00704306	0.513346	0.835116	0.965404	0.338711	4.3406e-20	-4.3537e-33	0.267268
FC-MZUSP	Leporinus lacustris	75359	1986.52	309.758	0.239971	4.16717	0.715939	0.00725527	0.00631196	0.474597	0.982317	0.968017	0.266607	-1.19295e-18	8.00751e-29	0.232869
FC-MZUSP	Leporinus lacustris	80833	2245.78	320.811	0.201403	4.96517	0.729059	0.00676395	0.0053547	0.457036	0.982317	0.966333	0.332732	-1.44577e-20	-2.3634e-31	0.230135
FC-MZUSP	Leporinus lacustris	84390	2121.83	327.794	0.235547	4.24544	0.788552	0.00647885	0.00495771	0.46208	0.993651	0.959456	0.338697	1.94895e-20	5.79477e-30	0.228533
FC-MZUSP	Leporinus lacustris	3079	519.213	62.6123	0.143525	6.96742	0.318079	0.177574	5.31037	0.651357	0.999295	0.975903	0.21413	5.58669e-19	5.68692e-27	1.07065
FC-MZUSP	Leporinus lacustris	11440	954.024	120.689	0.157949	6.33116	0.722313	0.0477928	0.283751	0.474781	0.877437	0.963278	0.377832	3.16277e-19	3.47028e-28	1.47492
FC-MZUSP	Leporinus lacustris	13145	658.517	129.371	0.380923	2.62521	0.875983	0.0356599	0.185879	0.57173	0.988699	0.976975	0.11315	4.08221e-20	6.60188e-28	0.239676
FC-MZUSP	Leporinus lacustris	48293	1783.88	247.969	0.190706	5.24367	0.748822	0.0113215	0.0222917	0.675781	0.99718	0.979385	0.15465	1.78201e-20	1.67952e-28	0.243159
FC-MZUSP	Leporinus macrocephalus	57692	1620.03	271.027	0.276236	3.62009	0.83323	0.00812504	0.00778826	0.479942	0.942163	0.977276	0.109173	6.57773e-20	1.74633e-28	0.219475
FC-MZUSP	Leporinus macrocephalus	1788	221.296	47.7132	0.458805	2.17957	0.816811	0.262164	10.7139	0.606935	0.99718	0.97727	0.122523	-6.49088e-19	2.43927e-27	0.262508
FC-MZUSP	Leporinus macrocephalus	3378	269.539	65.582	0.584287	1.71149	0.90056	0.138766	2.46083	0.507788	0.988699	0.973173	0.126249	-1.82727e-21	4.87416e-29	0.251939
FC-MZUSP	Leporinus macrocephalus	9028	586.434	107.214	0.329886	3.03135	0.784293	0.0605616	0.436195	0.475505	0.974489	0.968221	0.269084	-6.92131e-19	-6.80333e-30	0.207916
FC-MZUSP	Leporinus macrocephalus	56155	1829.47	267.393	0.210838	4.74298	0.821484	0.00973644	0.014001	0.57645	0.928362	0.978347	0.231259	-1.30692e-19	1.20954e-29	0.29111
FC-MZUSP	Leporinus macrocephalus	71498	2753.62	301.719	0.118494	8.43924	0.669375	0.00764707	0.00772403	0.516165	0.988699	0.96838	0.279052	-3.65388e-18	-1.94954e-27	0.246549
FC-MZUSP	Leporinus macrocephalus	4551	359.823	76.1217	0.441711	2.26393	0.899229	0.102999	1.51715	0.559712	0.965202	0.974599	0.138112	9.19777e-20	1.22608e-28	0.299956
FC-MZUSP	Leporinus macrocephalus	39363	1672.8	223.872	0.176771	5.65704	0.741369	0.0138899	0.0357829	0.721251	0.99718	0.98615	0.134155	3.00317e-19	7.30292e-28	0.320135
FC-MZUSP	Leporinus macrocephalus	42193	1708.86	231.78	0.181568	5.50758	0.751661	0.0129583	0.0306099	0.710939	0.999295	0.987656	0.159334	5.56296e-19	1.13508e-27	0.313931
FC-MZUSP	Leporinus macrocephalus	44865	1046.85	239.006	0.514457	1.9438	0.826837	0.0121866	0.0250814	0.659155	0.988699	0.982993	0.183853	5.56959e-20	8.04343e-29	0.266792
FC-MZUSP	Leporinus macrocephalus	59827	1587.86	275.997	0.298182	3.35366	0.845098	0.00783509	0.00711507	0.474267	0.999295	0.974442	0.144444	4.36823e-21	2.85929e-30	0.209962
FC-MZUSP	Leporinus macrocephalus	62673	1594.61	282.485	0.30973	3.22862	0.85627	0.0074793	0.00619977	0.468594	0.993651	0.975312	0.144695	5.66854e-22	9.5127e-30	0.220211
FC-MZUSP	Leporinus maculatus	63148	1804.15	283.553	0.243794	4.10183	0.823022	0.00742304	0.00665874	0.500444	0.982317	0.973895	0.183342	1.58442e-21	5.19495e-31	0.191305
FC-MZUSP	Leporinus maculatus	66394	1318.57	290.75	0.479883	2.08384	0.885584	0.00706013	0.0053828	0.45203	0.999295	0.972771	0.192431	5.72586e-22	2.94593e-31	0.19701
FC-MZUSP	Leporinus maculatus	3419	296.492	65.9788	0.488744	2.04606	0.902349	0.159915	4.48177	0.681936	0.999295	0.984657	0.183538	8.4149e-19	-1.43624e-27	0.352094
FC-MZUSP	Leporinus maculatus	4641	385.179	76.8707	0.393094	2.54392	0.827568	0.117809	2.38297	0.661842	0.999295	0.97595	0.268569	-7.97117e-19	-6.47915e-27	0.466334
FC-MZUSP	Leporinus maculatus	7141	338.794	95.353	0.781804	1.27909	0.951372	0.0656421	0.451275	0.404244	0.954434	0.951309	0.279465	4.62374e-19	8.39823e-28	0.171236
FC-MZUSP	Leporinus maculatus	43610	1940.2	235.64	0.145581	6.86902	0.496409	0.0125373	0.0279608	0.69047	0.988699	0.982885	0.184104	-4.77801e-18	6.86862e-27	0.321744
FC-MZUSP	Leporinus maculatus	51551	2218.4	256.197	0.131633	7.59686	0.65252	0.010606	0.0183993	0.635399	0.999295	0.976787	0.291713	-9.52459e-19	6.39581e-28	0.268641
FC-MZUSP	Leporinus maculatus	53349	2135.35	260.626	0.147027	6.80145	0.615897	0.0102486	0.0169775	0.630801	0.999295	0.978557	0.232341	-1.51038e-19	3.94607e-29	0.255955
FC-MZUSP	Leporinus maculatus	63728	1656.22	284.853	0.291946	3.42529	0.88617	0.00735548	0.00563912	0.441528	0.99718	0.974971	0.13076	5.08141e-21	-2.09863e-32	0.215938
FC-MZUSP	Leporinus maculatus	66528	2340.71	291.043	0.152587	6.55363	0.670355	0.00821834	0.00898795	0.53506	0.99718	0.978403	0.274885	-3.63394e-19	6.603e-29	0.238734
FC-MZUSP	Leporinus maculatus	67100	1469.88	292.292	0.390273	2.56231	0.923251	0.00698584	0.00479876	0.418384	1	0.968484	0.167327	-2.08536e-21	-2.30771e-33	0.211886
FC-MZUSP	Leporinus maculatus	71750	1813.2	302.25	0.274246	3.64636	0.735709	0.0065331	0.00575585	0.508037	0.928362	0.957491	0.264386	-4.33869e-18	-6.8371e-27	0.236709
FC-MZUSP	Leporinus maculatus	72950	1496.42	304.767	0.40938	2.44272	0.861234	0.00642563	0.00320681	0.380549	0.993651	0.966733	0.179307	5.31969e-22	3.65684e-32	0.224837
FC-MZUSP	Leporinus maculatus	73146	2218.91	305.176	0.186691	5.35645	0.799174	0.00640842	0.0048102	0.464999	0.99718	0.966579	0.279557	5.01611e-20	4.9992e-29	0.200663
FC-MZUSP	Leporinus maculatus	73267	1445.6	305.428	0.44058	2.26973	0.904788	0.00639783	0.00351712	0.388236	0.99718	0.96753	0.174612	6.10129e-21	9.84172e-31	0.204552
FC-MZUSP	Leporinus maculatus	75387	2134.66	309.816	0.207897	4.81008	0.771372	0.00621792	0.00465555	0.462757	0.993651	0.955094	0.218647	-2.3708e-19	2.32701e-27	0.208079
FC-MZUSP	Leporinus maculatus	75872	1913.99	310.811	0.260264	3.84226	0.792587	0.00617817	0.00393117	0.423763	0.974489	0.964858	0.228179	2.24898e-18	2.44653e-27	0.216221
FC-MZUSP	Leporinus maculatus	76732	2042.61	312.567	0.231107	4.32699	0.871994	0.00610892	0.00398618	0.442781	0.993651	0.963176	0.197477	7.5781e-20	5.52342e-30	0.198831
FC-MZUSP	Leporinus maculatus	54193	1390.08	262.68	0.35243	2.83744	0.896834	0.00864964	0.00902043	0.509738	0.974489	0.980431	0.0891145	4.84088e-21	4.09281e-30	0.195664
FC-MZUSP	Leporinus maculatus	55423	1213.22	265.644	0.473176	2.11338	0.856827	0.00986504	0.0124645	0.513245	0.993651	0.984596	0.112586	-6.36579e-24	-1.2319e-33	0.193456
FC-MZUSP	Leporinus maculatus	64077	1789.24	285.632	0.251521	3.97581	0.726628	0.00731542	0.00770059	0.557122	0.974489	0.972418	0.14051	6.1892e-19	1.44792e-27	0.20592
FC-MZUSP	Leporinus maculatus	74423	1686.86	307.828	0.32867	3.04256	0.785533	0.00734652	0.00562029	0.421094	0.835116	0.960146	0.227092	1.05036e-19	1.10018e-28	0.208915
FC-MZUSP	Leporinus maculatus	79262	2255.56	317.678	0.195779	5.10779	0.750132	0.00689801	0.00554502	0.461002	0.999295	0.967788	0.231947	5.21451e-20	4.07543e-29	0.218848
FC-MZUSP	Leporinus marggravii	1549	221.355	44.41	0.397266	2.51721	0.879614	0.35297	14.9239	0.476529	0.965202	0.969073	0.286142	7.84768e-20	1.2118e-28	0.453282
FC-MZUSP	Leporinus marggravii	1876	222.225	48.8733	0.47737	2.09481	0.893333	0.291445	12.5113	0.580689	0.993651	0.979298	0.247071	1.04898e-18	7.11573e-27	0.300725
FC-MZUSP	Leporinus marggravii	2376	205.882	55.002	0.704399	1.41965	0.986711	0.230114	6.6478	0.509221	0.999295	0.974884	0.271068	-4.38756e-19	4.09225e-29	0.216386
FC-MZUSP	Leporinus marggravii	2829	241.681	60.0166	0.608635	1.64302	0.857013	0.193266	5.78913	0.610741	0.928362	0.986071	0.168693	-1.24495e-18	-7.41897e-29	0.227785
FC-MZUSP	Leporinus marggravii	5356	342.024	82.5801	0.575356	1.73806	0.924883	0.102082	1.55976	0.581532	1	0.974111	0.271354	-4.20019e-19	2.03132e-27	0.274288
FC-MZUSP	Leporinus marggravii	5617	316.752	84.5682	0.703517	1.42143	0.953488	0.0973384	1.16964	0.486174	0.988699	0.97409	0.289773	2.4731e-20	2.14493e-29	0.200956
FC-MZUSP	Leporinus marggravii	44568	1710.05	238.214	0.19152	5.22139	0.728747	0.0105176	0.017043	0.609306	0.974489	0.98132	0.0823893	-7.98998e-19	-8.71355e-28	0.2378
FC-MZUSP	Leporinus marggravii	52028	1272.91	257.379	0.403508	2.47826	0.840748	0.00900957	0.011079	0.544745	0.993651	0.974327	0.131846	-2.75508e-19	2.13963e-28	0.205185
FC-MZUSP	Leporinus marggravii	52947	1882.51	259.642	0.187748	5.32629	0.671805	0.0103264	0.0181247	0.661067	0.993651	0.977766	0.300285	-1.37382e-18	-1.43874e-27	0.241198
FC-MZUSP	Leporinus marggravii	58144	2080.02	272.087	0.168881	5.92133	0.692999	0.00940338	0.0130579	0.573767	1	0.973206	0.362565	3.84838e-19	7.93718e-28	0.26387
FC-MZUSP	Leporinus marggravii	100304	2391.07	357.367	0.220467	4.53584	0.824462	0.00545093	0.00223874	0.320387	0.965202	0.953922	0.386003	-1.0441e-20	1.02356e-30	0.208149
FC-MZUSP	Leporinus marggravii	1097	120.569	37.373	0.948306	1.05451	0.982975	0.498405	37.4857	0.594305	0.974489	0.982553	0.0883389	1.84693e-20	1.71796e-29	0.160116
FC-MZUSP	Leporinus marggravii	40133	1227.8	226.051	0.334545	2.98914	0.753275	0.0136235	0.0273686	0.582043	0.974489	0.983951	0.110409	-7.8961e-19	-1.17026e-27	0.274498
FC-MZUSP	Leporinus marggravii	40304	1424.79	226.532	0.249491	4.00815	0.69498	0.0116304	0.0082401	0.33537	0.835116	0.988104	0.253375	6.19671e-21	1.62546e-30	0.405705
FC-MZUSP	Leporinus marggravii	44648	973.335	238.427	0.592225	1.68855	0.81464	0.0122458	0.0244319	0.639525	0.999295	0.98744	0.0963307	7.45219e-20	1.28796e-28	0.255087
FC-MZUSP	Leporinus melanostictus	45503	1262.14	240.699	0.358951	2.78589	0.728433	0.0103015	0.0052591	0.341497	0.857148	0.984889	0.353901	5.09899e-23	5.5036e-32	0.341604
FC-MZUSP	Leporinus melanostictus	59477	1562.37	275.188	0.306189	3.26595	0.871943	0.00919263	0.0103361	0.49652	0.999295	0.9859	0.111569	-7.78797e-21	1.45805e-31	0.213669
FC-MZUSP	Leporinus melanostictus	62950	1647.05	283.109	0.291603	3.42932	0.771701	0.00744639	0.00442098	0.399106	0.696212	0.994086	0.128095	8.13495e-22	4.693e-33	0.283153
FC-MZUSP	Leporinus melanostictus	66948	2364.02	291.96	0.150538	6.64285	0.670244	0.00816679	0.0081335	0.473658	0.999295	0.962847	0.285261	-7.23024e-19	1.11627e-27	0.247666
FC-MZUSP	Leporinus melanostictus	70157	2051.49	298.876	0.209479	4.77374	0.729867	0.00779324	0.00766489	0.545538	0.965202	0.968295	0.135688	2.23962e-17	1.40804e-25	0.247751
FC-MZUSP	Leporinus melanostictus	74617	1957.38	308.229	0.244735	4.08606	0.811822	0.00628208	0.00280619	0.380406	0.728134	0.988364	0.298421	-1.27311e-21	9.78093e-32	0.233882
FC-MZUSP	Leporinus melanostictus	82618	3244.84	324.334	0.098605	10.1415	0.632279	0.00661781	0.00596463	0.522645	0.982317	0.962787	0.305312	1.78816e-18	4.99978e-26	0.282406
FC-MZUSP	Leporinus melanostictus	82786	3201.61	324.664	0.101492	9.85301	0.691041	0.00660438	0.00536034	0.474757	0.993651	0.960377	0.324547	1.58052e-19	8.52035e-28	0.250452
FC-MZUSP	Leporinus melanostictus	32359	1195.01	202.98	0.284749	3.51186	0.6909	0.0168964	0.0450651	0.622718	0.988699	0.986148	0.178117	2.52168e-19	1.28759e-27	0.46833
FC-MZUSP	Leporinus melanostictus	71436	1440.77	301.588	0.43245	2.31241	0.867985	0.0076537	0.00702504	0.478656	1	0.971008	0.250838	-3.09813e-22	1.22028e-31	0.210338
FC-MZUSP	Leporinus melanostictus	86164	2022.12	331.221	0.264803	3.7764	0.783566	0.00634546	0.00453364	0.447418	0.99718	0.961962	0.349582	-9.01453e-21	3.42177e-30	0.223874
FC-MZUSP	Leporinus melanostictus	88242	1313.4	335.191	0.642819	1.55565	0.78829	0.0053121	0.000997325	0.354064	0.696212	0.991184	0.206291	-5.21988e-22	1.12006e-31	0.249353
FC-MZUSP	Leporinus melanostictus	98074	1387.68	353.372	0.640006	1.56248	0.82243	0.00477955	0.000474093	0.352243	0.835116	0.992133	0.138839	6.15679e-24	4.67478e-33	0.240859
FC-MZUSP	Leporinus melanostictus	5518	448.09	83.8197	0.345351	2.89561	0.812426	0.0990848	1.68993	0.667337	0.999295	0.979785	0.202608	2.11355e-18	1.77476e-28	0.248672
FC-MZUSP	Leporinus melanostictus	36378	1173.2	215.216	0.332127	3.01089	0.811357	0.0150297	0.0353805	0.615114	0.974489	0.979769	0.20268	9.04091e-20	3.8983e-30	0.235545
FC-MZUSP	Leporinus microphthalmus	73229	1630.43	305.349	0.346169	2.88876	0.763176	0.0074663	0.00658725	0.467928	1	0.973803	0.401986	2.53249e-20	3.26945e-30	0.217358
FC-MZUSP	Leporinus microphthalmus	1652	176.066	45.8627	0.669682	1.49325	0.951065	0.330962	17.8412	0.630851	0.99718	0.976577	0.240519	1.14996e-19	3.22114e-27	0.249013
FC-MZUSP	Leporinus microphthalmus	2683	271.012	58.4474	0.459042	2.17845	0.935169	0.203783	7.13378	0.662684	0.974489	0.971975	0.352747	-5.26087e-18	6.97123e-27	0.366652
FC-MZUSP	Leporinus microphthalmus	56415	1581.94	268.011	0.283286	3.53	0.779816	0.00830896	0.00757137	0.481974	0.965202	0.983128	0.0955723	1.37913e-21	7.19422e-32	0.239439
FC-MZUSP	Leporinus microphthalmus	57141	1266.94	269.73	0.447346	2.23541	0.879688	0.00820339	0.00723941	0.480876	0.954434	0.982725	0.107201	9.66072e-23	-1.59829e-32	0.214697
FC-MZUSP	Leporinus microphthalmus	57181	1106.45	269.824	0.586948	1.70373	0.841281	0.00956174	0.0119828	0.523583	0.999295	0.981899	0.149881	1.55277e-20	7.90865e-30	0.222564
FC-MZUSP	Leporinus microphthalmus	57574	1037.13	270.75	0.672615	1.48674	0.887214	0.00949647	0.0110495	0.503275	0.993651	0.98309	0.0911604	2.85321e-21	1.71891e-30	0.210598
FC-MZUSP	Leporinus microphthalmus	58679	1318.3	273.336	0.424292	2.35687	0.855928	0.00798838	0.00689118	0.479272	0.988699	0.982605	0.108688	4.99059e-22	2.81771e-33	0.216762
FC-MZUSP	Leporinus microphthalmus	59513	1281.21	275.271	0.455597	2.19492	0.882014	0.00787643	0.00673289	0.465972	1	0.97881	0.141287	4.87908e-22	-5.60598e-33	0.218134
FC-MZUSP	Leporinus microphthalmus	59609	1273.41	275.493	0.461939	2.16479	0.893742	0.00786375	0.00670439	0.464063	0.993651	0.976196	0.158914	-1.33811e-22	3.54975e-33	0.219665
FC-MZUSP	Leporinus microphthalmus	61380	1224.1	279.556	0.51476	1.94265	0.925694	0.00763685	0.00628366	0.448936	0.993651	0.97621	0.156558	7.71381e-22	8.90281e-31	0.209035
FC-MZUSP	Leporinus microphthalmus	64703	1223	287.023	0.543601	1.83959	0.955266	0.00724464	0.00569258	0.447261	0.982317	0.9718	0.177126	9.83364e-21	8.41402e-30	0.221291
FC-MZUSP	Leporinus microphthalmus	66808	1537.44	291.655	0.355177	2.8155	0.862328	0.00701638	0.00578582	0.48406	0.954434	0.978825	0.124628	8.18611e-21	-2.75514e-31	0.223791
FC-MZUSP	Leporinus microphthalmus	67165	1221.87	292.433	0.565329	1.76888	0.94736	0.00697908	0.00485266	0.416082	0.999295	0.964676	0.199599	8.61369e-22	2.11512e-31	0.221088
FC-MZUSP	Leporinus moralesi	74091	2141.43	307.141	0.203033	4.92531	0.73625	0.00737944	0.00701601	0.507466	0.942163	0.971587	0.194359	1.3421e-21	-6.40512e-29	0.234022
FC-MZUSP	Leporinus moralesi	76823	1898.6	312.752	0.267815	3.73392	0.812323	0.00610169	0.00482397	0.498801	0.974489	0.962545	0.281153	1.52887e-19	1.80043e-28	0.186819
FC-MZUSP	Leporinus moralesi	77217	1744.43	313.553	0.318871	3.13606	0.797696	0.00607055	0.00405708	0.434936	1	0.965033	0.268454	4.93101e-20	4.32646e-29	0.188985
FC-MZUSP	Leporinus moralesi	78174	2306.91	315.49	0.184591	5.41739	0.803127	0.00599624	0.00497382	0.531786	0.993651	0.966077	0.222155	1.8365e-18	1.29077e-26	0.192836
FC-MZUSP	Leporinus moralesi	78507	1954.2	316.162	0.258334	3.87095	0.800561	0.00597081	0.00440884	0.479221	0.988699	0.96587	0.257778	1.64043e-19	1.40674e-28	0.188732
FC-MZUSP	Leporinus moralesi	80176	1911.38	319.505	0.275777	3.62612	0.80677	0.00584651	0.00418601	0.473561	0.982317	0.963708	0.204394	8.43647e-19	2.17689e-27	0.192039
FC-MZUSP	Leporinus moralesi	83030	1829.43	325.142	0.311756	3.20763	0.820147	0.00564555	0.00385791	0.46985	0.99718	0.964701	0.253784	7.78491e-19	1.04554e-27	0.185074
FC-MZUSP	Leporinus moralesi	85353	1850.86	329.659	0.3131	3.19387	0.849876	0.0054919	0.00355357	0.454138	1	0.957441	0.338446	1.96489e-19	2.63392e-28	0.181828
FC-MZUSP	Leporinus moralesi	86727	1955.93	332.301	0.284878	3.51028	0.835448	0.00540489	0.00309853	0.427562	0.999295	0.966714	0.176199	5.43683e-19	7.2959e-28	0.181033
FC-MZUSP	Leporinus moralesi	91427	1853.5	341.187	0.334425	2.99021	0.858461	0.00512704	0.00269832	0.409742	0.993651	0.959405	0.324829	2.55278e-20	4.22879e-29	0.181938
FC-MZUSP	Leporinus moralesi	2158	232.711	52.418	0.500759	1.99697	0.928172	0.25336	8.75385	0.533753	0.993651	0.978923	0.286944	4.96831e-19	1.72981e-28	0.224298
FC-MZUSP	Leporinus moralesi	4285	277.681	73.8636	0.698341	1.43196	0.932941	0.127596	1.79179	0.443875	0.99718	0.968208	0.210822	3.56467e-20	2.32465e-28	0.174866
FC-MZUSP	Leporinus moralesi	52106	1206.78	257.572	0.449613	2.22414	0.895031	0.00899608	0.0100313	0.502466	0.99718	0.975069	0.130727	-6.51015e-22	3.43412e-32	0.199737
FC-MZUSP	Leporinus moralesi	57418	1629.42	270.383	0.271764	3.67966	0.868351	0.00816382	0.00808576	0.493899	0.999295	0.968444	0.265739	1.53143e-21	3.12133e-31	0.218631
FC-MZUSP	Leporinus moralesi	63843	1461.64	285.11	0.37553	2.66291	0.853744	0.00734223	0.00618786	0.482448	0.999295	0.968262	0.239916	-6.01459e-21	1.38529e-30	0.231701
FC-MZUSP	Leporinus moralesi	65693	2075.78	289.211	0.191588	5.21954	0.757827	0.00713546	0.00874278	0.655915	0.999295	0.96999	0.282907	3.62177e-19	4.79416e-26	0.213834
FC-MZUSP	Leporinus moralesi	66715	2037.21	291.452	0.202005	4.95036	0.708942	0.00819531	0.00852192	0.506536	0.999295	0.977527	0.173785	3.40225e-19	1.24309e-27	0.250533
FC-MZUSP	Leporinus moralesi	66739	1407.49	291.504	0.423347	2.36213	0.860549	0.00702363	0.00472256	0.425534	0.999295	0.965486	0.19462	4.3699e-21	3.16368e-30	0.225827
FC-MZUSP	Leporinus moralesi	66979	1374.54	292.028	0.445485	2.24474	0.892482	0.00699846	0.00451881	0.437535	0.999295	0.965772	0.290418	-5.61542e-21	3.75156e-31	0.226911
FC-MZUSP	Leporinus moralesi	67107	1370.91	292.307	0.448705	2.22864	0.866904	0.00698511	0.00444029	0.453018	0.999295	0.977105	0.161337	9.8631e-22	1.82868e-31	0.225249
FC-MZUSP	Leporinus moralesi	68637	1439.98	295.62	0.415964	2.40406	0.892351	0.00682941	0.00385609	0.438716	0.99718	0.978471	0.194703	-5.26137e-22	8.54393e-32	0.213492
FC-MZUSP	Leporinus moralesi	69260	1668.33	296.959	0.3127	3.19795	0.887209	0.00676798	0.00468299	0.475716	0.99718	0.974058	0.16934	6.6982e-22	9.87927e-32	0.201022
FC-MZUSP	Leporinus moralesi	70042	2173.72	298.631	0.186278	5.36831	0.747952	0.00669241	0.00646594	0.545144	0.982317	0.965013	0.222991	-1.13932e-17	5.35601e-26	0.223916
FC-MZUSP	Leporinus moralesi	72041	1605.74	302.862	0.351105	2.84815	0.803473	0.00650671	0.00522947	0.47846	0.999295	0.961894	0.287502	1.90073e-18	1.12665e-26	0.206039
FC-MZUSP	Leporinus moralesi	72107	2726.96	303.001	0.121851	8.20674	0.77223	0.00650076	0.00631178	0.574393	0.999295	0.965145	0.319515	3.07672e-19	2.22724e-28	0.201169
FC-MZUSP	Leporinus moralesi	73870	1750.93	306.683	0.302788	3.30264	0.779409	0.00634561	0.004641	0.452677	1	0.959364	0.330359	1.68311e-18	2.30734e-26	0.209251
FC-MZUSP	Leporinus moralesi	75806	1773.93	310.675	0.30272	3.30338	0.818189	0.00618355	0.0053342	0.53401	1	0.959922	0.356792	1.11896e-18	7.62936e-28	0.198386
FC-MZUSP	Leporinus moralesi	76344	2459.64	311.776	0.158577	6.30607	0.587108	0.00716166	0.00634161	0.493279	0.942163	0.970806	0.20404	2.35238e-19	-9.82169e-30	0.266869
FC-MZUSP	Leporinus moralesi	76843	1851.63	312.793	0.281648	3.55053	0.792932	0.0061001	0.00576364	0.578468	0.999295	0.959137	0.402005	5.08026e-18	5.45032e-25	0.207807
FC-MZUSP	Leporinus moralesi	77031	1881.33	313.176	0.273492	3.65642	0.772814	0.00709779	0.00528989	0.425426	0.99718	0.974522	0.183753	-1.63073e-20	1.22168e-29	0.229482
FC-MZUSP	Leporinus moralesi	84227	1702.47	327.477	0.365175	2.73841	0.885929	0.00556532	0.00363978	0.457215	0.993651	0.952097	0.420568	9.79985e-20	3.21817e-28	0.177926
FC-MZUSP	Leporinus mormyrops	86306	2569.98	331.494	0.164206	6.0899	0.711344	0.00633502	0.00405795	0.416643	1	0.970775	0.21244	-1.06423e-19	9.43939e-29	0.232715
FC-MZUSP	Leporinus mormyrops	90178	2556.63	338.848	0.17337	5.76799	0.693538	0.00606301	0.00349149	0.390633	1	0.964988	0.284667	-3.90324e-21	5.91813e-30	0.241232
FC-MZUSP	Leporinus mormyrops	2565	245.782	57.1477	0.533578	1.87414	0.881746	0.182749	5.13328	0.591383	0.99718	0.972225	0.16924	2.16855e-19	2.41719e-29	0.262049
FC-MZUSP	Leporinus mormyrops	3273	242.811	64.5547	0.697619	1.43345	0.980234	0.167049	3.72736	0.530853	0.99718	0.976997	0.237311	2.42029e-18	1.96419e-26	0.212796
FC-MZUSP	Leporinus mormyrops	7990	517.362	100.862	0.375117	2.66583	0.702171	0.0684293	0.766842	0.634971	1	0.978132	0.286679	4.77931e-18	2.21938e-26	0.289764
FC-MZUSP	Leporinus mormyrops	18115	901.252	151.871	0.280257	3.56816	0.746795	0.0301822	0.134916	0.57382	0.965202	0.974112	0.338561	8.02604e-18	1.49128e-25	0.310042
FC-MZUSP	Leporinus mormyrops	31936	1044.81	201.649	0.367635	2.72009	0.802412	0.0146778	0.0372218	0.671929	0.99718	0.981654	0.127168	3.36089e-20	2.47275e-29	0.298263
FC-MZUSP	Leporinus mormyrops	39229	1407.6	223.49	0.248804	4.01923	0.701069	0.0119491	0.0237465	0.649435	0.999295	0.984114	0.107168	-3.47568e-20	-6.93187e-30	0.249131
FC-MZUSP	Leporinus mormyrops	53486	1466.93	260.961	0.312341	3.20163	0.81952	0.00876398	0.00943457	0.496213	0.982317	0.979972	0.112214	-1.52025e-20	-1.84388e-31	0.219916
FC-MZUSP	Leporinus mormyrops	58819	1276.28	273.662	0.453769	2.20377	0.850957	0.00796936	0.00748946	0.477434	0.99718	0.973503	0.145931	5.82068e-20	4.65047e-29	0.211387
FC-MZUSP	Leporinus mormyrops	59774	1276.79	275.874	0.460768	2.17029	0.907592	0.00914695	0.0106336	0.50557	0.78556	0.974489	0.171593	2.53456e-20	6.30238e-30	0.197558
FC-MZUSP	Leporinus mormyrops	70179	2033.78	298.923	0.213212	4.69018	0.679772	0.00779079	0.00789797	0.520308	0.974489	0.973194	0.231073	2.89334e-19	2.40961e-27	0.286393
FC-MZUSP	Leporinus mormyrops	70713	2752.35	300.058	0.117301	8.52508	0.568702	0.00773196	0.00842428	0.552034	0.857148	0.967915	0.23585	2.8699e-18	1.06476e-25	0.35125
FC-MZUSP	Leporinus mormyrops	81154	1963.45	321.447	0.264533	3.78024	0.714598	0.00673719	0.00502223	0.440083	0.811278	0.96673	0.217875	5.74531e-19	1.77706e-27	0.245466
FC-MZUSP	Leporinus multifasciatus	2123	188.853	51.9912	0.74802	1.33686	0.930324	0.257537	7.67468	0.465521	0.877437	0.970446	0.201111	2.17634e-21	5.9262e-31	0.17812
FC-MZUSP	Leporinus multifasciatus	57254	1487.98	269.996	0.324954	3.07736	0.866238	0.0081872	0.00729815	0.474657	0.988699	0.976735	0.13584	8.69657e-23	6.77697e-33	0.208889
FC-MZUSP	Leporinus multifasciatus	59812	1278.87	275.962	0.459565	2.17597	0.914529	0.00783706	0.00678874	0.456451	0.99718	0.972081	0.147251	2.13913e-22	5.71714e-32	0.189175
FC-MZUSP	Leporinus multifasciatus	60703	1238.44	278.01	0.497359	2.01062	0.901226	0.00772202	0.00622799	0.439613	0.999295	0.976152	0.127903	-4.21701e-22	1.06266e-31	0.186798
FC-MZUSP	Leporinus multifasciatus	60816	1471.84	278.268	0.352783	2.8346	0.866572	0.00770768	0.00649059	0.472257	0.982317	0.973801	0.180685	8.51165e-24	-1.27933e-31	0.216083
FC-MZUSP	Leporinus multifasciatus	61024	1262.44	278.744	0.481159	2.07832	0.897583	0.0076814	0.0063646	0.44872	0.982317	0.975924	0.142322	1.36943e-21	2.11267e-31	0.19393
FC-MZUSP	Leporinus multifasciatus	63291	1169.37	283.874	0.581632	1.7193	0.946323	0.00740627	0.00530018	0.427233	1	0.977766	0.121203	-1.41092e-21	5.52168e-33	0.182014
FC-MZUSP	Leporinus multifasciatus	63973	1462.91	285.4	0.37564	2.66212	0.916282	0.00732731	0.00556461	0.451632	1	0.976315	0.145614	8.34891e-23	2.78288e-32	0.210806
FC-MZUSP	Leporinus multifasciatus	65128	1286.83	287.964	0.49424	2.02331	0.932331	0.00719737	0.00477873	0.410197	0.993651	0.977612	0.134085	-3.92118e-21	7.59452e-32	0.184144
FC-MZUSP	Leporinus multifasciatus	66636	1317.17	291.279	0.482654	2.07188	0.939912	0.00703449	0.00431713	0.401616	0.974489	0.972953	0.169407	-3.06134e-21	2.15804e-31	0.184835
FC-MZUSP	Leporinus multifasciatus	67376	1176.28	292.892	0.611917	1.63421	0.941006	0.00695723	0.00445443	0.423119	0.99718	0.970019	0.166366	-7.89845e-21	4.05102e-31	0.174911
FC-MZUSP	Leporinus multifasciatus	67417	1561.58	292.981	0.347418	2.87838	0.873028	0.00695299	0.00484726	0.429854	0.982317	0.969009	0.170134	1.84431e-21	3.37961e-31	0.205901
FC-MZUSP	Leporinus multifasciatus	70196	1453.03	298.959	0.417802	2.39348	0.824923	0.00667773	0.00452121	0.419276	0.982317	0.968378	0.207794	6.71084e-20	5.58492e-29	0.191177
FC-MZUSP	Leporinus multifasciatus	71341	1896.14	301.387	0.24935	4.01042	0.74573	0.00657056	0.00502144	0.44951	0.999295	0.96235	0.235689	-1.73523e-18	1.75271e-27	0.211006
FC-MZUSP	Leporinus nattereri	72857	1594.67	304.573	0.360029	2.77755	0.811949	0.00643384	0.00439992	0.434129	0.999295	0.97124	0.215865	-1.77741e-21	-8.24159e-31	0.192135
FC-MZUSP	Leporinus nattereri	73237	1625.5	305.366	0.34831	2.87101	0.805085	0.00640045	0.00533887	0.503638	0.982317	0.961621	0.245063	-7.60508e-19	-9.95685e-28	0.192997
FC-MZUSP	Leporinus nattereri	73965	1190.78	306.88	0.655496	1.52556	0.967495	0.00633746	0.00303309	0.396246	1	0.969487	0.182072	-4.16806e-21	8.81244e-32	0.196354
FC-MZUSP	Leporinus nattereri	74195	1633.74	307.356	0.349314	2.86275	0.799955	0.00631781	0.00379883	0.397121	0.982317	0.967424	0.184144	3.55962e-20	1.09693e-30	0.202294
FC-MZUSP	Leporinus nattereri	74571	1604.27	308.134	0.364103	2.74648	0.808682	0.00628596	0.00416842	0.418509	0.993651	0.968165	0.161846	2.67374e-21	6.64862e-29	0.194109
FC-MZUSP	Leporinus nattereri	74595	2019.73	308.184	0.22979	4.3518	0.820925	0.00628393	0.00561203	0.540098	0.974489	0.964317	0.325831	-1.81905e-18	-3.23278e-27	0.18487
FC-MZUSP	Leporinus nattereri	75794	1821.01	310.651	0.287225	3.48159	0.788166	0.00721363	0.00557394	0.435347	0.974489	0.970874	0.194237	2.02189e-20	9.38762e-30	0.205297
FC-MZUSP	Leporinus nattereri	76814	1546.93	312.734	0.403373	2.47909	0.860835	0.0061024	0.00359512	0.409624	1	0.964486	0.273033	5.62813e-23	2.8495e-30	0.177839
FC-MZUSP	Leporinus nattereri	80224	1613.08	319.6	0.38744	2.58104	0.80484	0.00584301	0.00423387	0.481007	0.982317	0.960969	0.356441	-2.8545e-19	4.6554e-28	0.1994
FC-MZUSP	Leporinus nattereri	80571	1774.05	320.291	0.321706	3.10843	0.835279	0.00581785	0.00328727	0.397256	0.982317	0.964503	0.244094	6.08554e-22	4.56591e-30	0.191006
FC-MZUSP	Leporinus nattereri	80928	1476.65	321	0.466395	2.1441	0.84612	0.00579219	0.00345238	0.413252	0.982317	0.957901	0.338722	-9.17485e-20	-4.04165e-29	0.196481
FC-MZUSP	Leporinus nattereri	81865	1547.86	322.853	0.429382	2.32893	0.803835	0.00572589	0.00332971	0.404954	0.982317	0.956323	0.37183	-1.64701e-19	6.55743e-28	0.197941
FC-MZUSP	Leporinus nattereri	52900	1209.51	259.527	0.454407	2.20067	0.857333	0.00886106	0.00889249	0.47561	0.965202	0.978227	0.115205	-1.53643e-22	-1.5789e-32	0.202685
FC-MZUSP	Leporinus nattereri	58428	2061.37	272.751	0.17279	5.78739	0.75505	0.00802269	0.00897932	0.552941	0.99718	0.972544	0.188622	-9.30154e-20	2.75696e-29	0.192112
FC-MZUSP	Leporinus nattereri	65087	1748.17	287.874	0.267631	3.73649	0.737112	0.0072019	0.00650576	0.491363	0.974489	0.96179	0.212147	-7.7412e-19	3.31493e-28	0.19983
FC-MZUSP	Leporinus nigrotaeniatus	66311	1598.29	290.568	0.326201	3.0656	0.739723	0.00706896	0.00533829	0.442849	1	0.966291	0.186399	-7.00227e-20	5.21545e-29	0.198508
FC-MZUSP	Leporinus nigrotaeniatus	30961	1030.57	198.547	0.366331	2.72977	0.722645	0.01514	0.0409059	0.694761	0.974489	0.980123	0.0500084	-3.89045e-21	-5.74643e-30	0.248779
FC-MZUSP	Leporinus nigrotaeniatus	40666	1421.74	227.547	0.252812	3.9555	0.749369	0.0115268	0.0209379	0.614049	0.982317	0.978302	0.0500585	-3.52764e-19	6.6996e-29	0.220653
FC-MZUSP	Leporinus nigrotaeniatus	45122	1656.52	239.69	0.206635	4.83945	0.639321	0.0103885	0.0174365	0.616802	0.982317	0.968604	0.184871	6.06148e-18	1.25196e-26	0.26508
FC-MZUSP	Leporinus nigrotaeniatus	52996	1517.89	259.763	0.289051	3.4596	0.751301	0.00884501	0.0136216	0.658252	1	0.966394	0.255288	4.59518e-18	6.46614e-27	0.206579
FC-MZUSP	Leporinus nigrotaeniatus	53432	1853.83	260.829	0.195375	5.11836	0.723599	0.00877283	0.0124604	0.617711	0.942163	0.969828	0.27249	-4.94511e-19	3.88107e-27	0.220799
FC-MZUSP	Leporinus nigrotaeniatus	53628	1898.81	261.307	0.186913	5.35007	0.685062	0.00874077	0.0117294	0.585714	0.912999	0.963105	0.212231	-8.0305e-19	-4.87255e-28	0.214946
FC-MZUSP	Leporinus nigrotaeniatus	54541	1343.09	263.522	0.379945	2.63196	0.848491	0.00859445	0.0102694	0.537903	0.974489	0.962851	0.243492	-1.94339e-20	8.72728e-30	0.188791
FC-MZUSP	Leporinus nigrotaeniatus	55052	1589.54	264.753	0.273803	3.65226	0.717019	0.00851468	0.0107652	0.556337	0.928362	0.95681	0.372707	-1.48096e-18	-3.93716e-29	0.256994
FC-MZUSP	Leporinus nigrotaeniatus	55737	1214.14	266.395	0.475134	2.10467	0.86575	0.00841003	0.00833131	0.480461	0.965202	0.970671	0.213317	-9.38903e-21	3.28017e-31	0.203014
FC-MZUSP	Leporinus nigrotaeniatus	56051	1682.74	267.145	0.248748	4.02013	0.694465	0.00836292	0.00984435	0.525229	0.988699	0.954887	0.299248	-6.85037e-20	1.40725e-27	0.251277
FC-MZUSP	Leporinus nigrotaeniatus	56188	1679.04	267.471	0.250456	3.99272	0.80209	0.00834253	0.00894675	0.513392	0.993651	0.968773	0.177678	4.19373e-21	1.16543e-29	0.205148
FC-MZUSP	Leporinus nigrotaeniatus	58630	1368.81	273.222	0.393228	2.54305	0.903543	0.00799505	0.00781887	0.473092	0.999295	0.959896	0.324378	1.31159e-22	8.6e-32	0.201894
FC-MZUSP	Leporinus nigrotaeniatus	58786	1886.86	273.585	0.207493	4.81945	0.747248	0.00797384	0.00940035	0.55963	0.896038	0.960866	0.288371	6.33793e-20	1.97095e-28	0.200357
FC-MZUSP	Leporinus nigrotaeniatus	59721	1245.45	275.752	0.483818	2.06689	0.908899	0.007849	0.00691765	0.458236	0.999295	0.965972	0.226249	5.74708e-22	1.99927e-31	0.20386
FC-MZUSP	Leporinus nigrotaeniatus	61311	1606.09	279.399	0.298683	3.34804	0.744291	0.00764545	0.00752745	0.488923	0.982317	0.959514	0.280652	-6.85688e-18	-3.93582e-27	0.242557
FC-MZUSP	Leporinus nigrotaeniatus	61535	1378.44	279.909	0.406964	2.45722	0.902458	0.00761762	0.00591399	0.41265	0.982317	0.961404	0.285297	3.30882e-22	5.76149e-31	0.20231
FC-MZUSP	Leporinus nigrotaeniatus	62005	1228.64	280.975	0.516162	1.93738	0.942941	0.00755987	0.00569061	0.414665	0.999295	0.969115	0.192874	1.21088e-22	5.97778e-34	0.200495
FC-MZUSP	Leporinus nigrotaeniatus	63121	1303.6	283.493	0.466765	2.14241	0.922957	0.00742621	0.00631634	0.448197	0.999295	0.95914	0.290927	-4.1351e-23	2.71355e-31	0.194001
FC-MZUSP	Leporinus nigrotaeniatus	64130	1184.04	285.75	0.57483	1.73965	0.943893	0.00730937	0.00498854	0.403317	0.99718	0.962764	0.242473	1.89754e-22	7.85611e-32	0.181593
FC-MZUSP	Leporinus nigrotaeniatus	64335	1302.72	286.206	0.476378	2.09917	0.92148	0.00728608	0.00497637	0.388001	0.982317	0.959722	0.288672	9.56461e-23	2.28292e-31	0.216098
FC-MZUSP	Leporinus nijsseni	65888	1248.62	289.64	0.531071	1.88299	0.943616	0.00711435	0.00469736	0.396936	0.988699	0.961719	0.227068	-7.18043e-22	2.51964e-31	0.203539
FC-MZUSP	Leporinus nijsseni	66042	1379.55	289.978	0.436067	2.29323	0.861897	0.00709776	0.00523286	0.428548	1	0.956251	0.266366	1.16456e-21	3.23068e-30	0.200746
FC-MZUSP	Leporinus nijsseni	69056	2286.53	296.521	0.165981	6.02479	0.777982	0.00678797	0.00751363	0.609764	1	0.960686	0.3867	-5.12836e-19	-1.00172e-29	0.207615
FC-MZUSP	Leporinus nijsseni	69219	1883.68	296.871	0.245145	4.07922	0.809238	0.00677198	0.00612726	0.499969	0.928362	0.951993	0.382247	-1.48866e-19	1.83342e-28	0.193064
FC-MZUSP	Leporinus nijsseni	69559	1764.71	297.599	0.280682	3.56275	0.874648	0.00673888	0.00447059	0.439227	0.999295	0.970861	0.142055	-8.47204e-22	-1.44268e-32	0.189196
FC-MZUSP	Leporinus nijsseni	71485	1327.81	301.691	0.509508	1.96268	0.942614	0.00655732	0.00306091	0.3593	0.912999	0.975543	0.109039	-1.01108e-21	-3.10411e-33	0.208422
FC-MZUSP	Leporinus nijsseni	71616	1429.35	301.967	0.440495	2.27017	0.926396	0.00654533	0.00348225	0.401473	0.954434	0.96975	0.139808	-1.24975e-22	2.98807e-33	0.196804
FC-MZUSP	Leporinus nijsseni	72096	1858.23	302.978	0.262375	3.81134	0.749672	0.00650175	0.00415416	0.400037	1	0.958872	0.312815	-2.65601e-19	7.70112e-29	0.220386
FC-MZUSP	Leporinus nijsseni	73603	1370.72	306.128	0.492272	2.0314	0.936091	0.00636863	0.00322766	0.401488	0.928362	0.96962	0.138563	-1.04132e-21	-2.26933e-32	0.189387
FC-MZUSP	Leporinus nijsseni	74929	1557.08	308.873	0.388365	2.57489	0.851466	0.00625592	0.00348843	0.358544	0.999295	0.954826	0.267293	6.77828e-21	4.98531e-30	0.185943
FC-MZUSP	Leporinus nijsseni	75504	1424.72	310.056	0.467431	2.13935	0.931734	0.00620828	0.00307817	0.356905	0.942163	0.962284	0.15467	-3.50163e-21	-2.54745e-32	0.200215
FC-MZUSP	Leporinus obtusidens	75605	1661.16	310.263	0.344301	2.90444	0.852868	0.00619999	0.00347813	0.387585	0.999295	0.967452	0.32401	-5.86508e-23	4.70765e-31	0.186442
FC-MZUSP	Leporinus obtusidens	75899	1410.6	310.866	0.479334	2.08623	0.918685	0.00617597	0.00238792	0.325966	0.912999	0.959499	0.16462	1.542e-22	4.65202e-33	0.216885
FC-MZUSP	Leporinus obtusidens	76142	1576.41	311.363	0.385033	2.59718	0.802103	0.00615626	0.00383281	0.40103	0.993651	0.955994	0.333718	1.30738e-19	1.05537e-28	0.196144
FC-MZUSP	Leporinus obtusidens	77557	1657.48	314.243	0.354761	2.8188	0.824715	0.00604394	0.00368888	0.408326	1	0.956889	0.321754	1.84779e-22	2.16792e-30	0.201816
FC-MZUSP	Leporinus obtusidens	79743	1377.41	318.641	0.528172	1.89332	0.923817	0.00587826	0.0023768	0.352665	0.942163	0.957874	0.181688	-2.04442e-21	2.64644e-33	0.197865
FC-MZUSP	Leporinus obtusidens	81573	1385.49	322.276	0.534012	1.87262	0.892786	0.00574639	0.00186965	0.301731	0.942163	0.946604	0.23807	1.48165e-24	-2.08024e-32	0.214125
FC-MZUSP	Leporinus obtusidens	83979	1433.17	326.994	0.51379	1.94632	0.936868	0.00558175	0.00232267	0.337855	0.988699	0.948256	0.294319	-7.15458e-22	5.48263e-32	0.192349
FC-MZUSP	Leporinus obtusidens	85907	1966.88	330.727	0.27905	3.58359	0.829578	0.00545648	0.00246962	0.347572	0.988699	0.952645	0.31203	4.37911e-21	7.47416e-30	0.186197
FC-MZUSP	Leporinus obtusidens	87053	1836.25	332.925	0.324438	3.08225	0.820233	0.00538465	0.00245188	0.353798	0.993651	0.94977	0.38452	1.27621e-20	2.81482e-29	0.194945
FC-MZUSP	Leporinus obtusidens	91201	1613.72	340.765	0.440102	2.2722	0.870704	0.00513975	0.00227653	0.35068	0.993651	0.941414	0.424453	1.05152e-20	2.53938e-29	0.182311
FC-MZUSP	Leporinus obtusidens	92579	1606.51	343.33	0.450772	2.21841	0.874236	0.00506324	0.00213226	0.351172	1	0.948339	0.394152	1.26004e-20	7.32925e-30	0.180577
FC-MZUSP	Leporinus obtusidens	68867	1348.28	296.115	0.476058	2.10058	0.915432	0.0068066	0.00418126	0.402035	0.982317	0.96907	0.144043	-4.80935e-21	2.83951e-31	0.194644
FC-MZUSP	Leporinus obtusidens	71410	1705.96	301.533	0.30834	3.24317	0.770559	0.00656421	0.0050254	0.451877	0.993651	0.962464	0.255397	1.64527e-18	1.02189e-26	0.225744
FC-MZUSP	Leporinus obtusidens	73705	1304.37	306.34	0.54438	1.83695	0.919416	0.00635981	0.00277003	0.328842	0.982317	0.964533	0.133091	9.126e-23	4.17465e-32	0.224404
FC-MZUSP	Leporinus obtusidens	81218	1939.63	321.574	0.271285	3.68616	0.828375	0.0057715	0.00307485	0.380838	0.999295	0.962421	0.262189	4.38257e-21	-1.83325e-30	0.186927
FC-MZUSP	Leporinus obtusidens	54022	1766.96	262.265	0.217433	4.59912	0.724155	0.00867702	0.0114117	0.584058	0.982317	0.974039	0.111211	6.0942e-20	2.21414e-29	0.202841
FC-MZUSP	Leporinus obtusidens	54916	1122	264.426	0.548183	1.82421	0.926946	0.00853576	0.00802747	0.472063	0.993651	0.977925	0.103308	1.79176e-21	7.28147e-31	0.1844
FC-MZUSP	Leporinus obtusidens	60458	1224.83	277.448	0.506425	1.97463	0.936549	0.00775332	0.00607284	0.441201	0.999295	0.97627	0.106667	-7.24706e-23	4.23455e-31	0.191243
FC-MZUSP	Leporinus obtusidens	60816	1740.31	278.268	0.252332	3.96303	0.799222	0.00770768	0.00751418	0.498327	0.974489	0.968967	0.129089	8.16737e-22	8.63415e-31	0.190043
FC-MZUSP	Leporinus obtusidens	51700	1160.92	256.567	0.482055	2.07445	0.805785	0.00906673	0.00204021	0.377342	0.835116	0.991986	0.170718	5.44231e-24	5.86528e-33	0.31822
FC-MZUSP	Leporinus obtusidens	88463	2001.09	335.611	0.277611	3.60216	0.814952	0.00529883	0.00101004	0.363246	0.696212	0.99096	0.217769	-1.34912e-21	7.83397e-33	0.232187
FC-MZUSP	Leporinus obtusidens	43668	1206.2	235.796	0.377169	2.65133	0.770634	0.0107344	0.00494933	0.322818	0.877437	0.989723	0.193158	1.07228e-21	2.19563e-31	0.37219
FC-MZUSP	Leporinus obtusidens	44588	1230.74	238.267	0.369908	2.70338	0.78687	0.0105129	0.00436466	0.329721	0.835116	0.989578	0.191537	8.27894e-22	1.17935e-31	0.370716
FC-MZUSP	Leporinus obtusidens	49367	1264.42	250.711	0.388031	2.57711	0.771854	0.00949521	0.00252729	0.359456	0.835116	0.98737	0.218596	9.47507e-23	1.80483e-32	0.336204
FC-MZUSP	Leporinus obtusidens	49467	1193.24	250.965	0.436583	2.29052	0.777869	0.00947601	0.00270011	0.381131	0.835116	0.987907	0.208246	5.67248e-23	2.13087e-32	0.331838
FC-MZUSP	Leporinus octofasciatus	50281	1157.39	253.021	0.47169	2.12004	0.823037	0.00932261	0.00228043	0.431467	0.78556	0.98802	0.197118	7.93602e-24	1.00962e-33	0.307747
FC-MZUSP	Leporinus octofasciatus	51289	1167.59	255.545	0.472775	2.11517	0.805291	0.00913939	0.00194163	0.40769	0.877437	0.98907	0.180785	1.06441e-23	2.08774e-33	0.317399
FC-MZUSP	Leporinus octofasciatus	76758	1777.13	312.62	0.305419	3.27419	0.786656	0.00610686	0.00193792	0.334017	0.696212	0.993259	0.116784	2.56024e-21	2.75056e-31	0.264016
FC-MZUSP	Leporinus octofasciatus	81068	1867.96	321.277	0.29196	3.42513	0.823485	0.00578218	0.00167905	0.420026	0.696212	0.988921	0.201161	-1.66228e-21	1.2567e-31	0.235958
FC-MZUSP	Leporinus octofasciatus	81785	2061.12	322.695	0.241924	4.13354	0.816878	0.00573149	0.00156387	0.392258	0.728134	0.991288	0.203601	7.67579e-22	1.0134e-31	0.24444
FC-MZUSP	Leporinus octofasciatus	81982	1700.57	323.083	0.356239	2.8071	0.834932	0.00571772	0.00146133	0.401187	0.661976	0.990504	0.182632	-3.12411e-22	6.19651e-32	0.231628
FC-MZUSP	Leporinus octofasciatus	85439	1879.92	329.825	0.303799	3.29165	0.827256	0.00548637	0.0012236	0.389245	0.625262	0.990164	0.186533	-6.52708e-22	8.18994e-32	0.230695
FC-MZUSP	Leporinus octofasciatus	85807	1289.12	330.534	0.648853	1.54118	0.864093	0.00546284	0.00128078	0.383706	0.696212	0.992064	0.171136	7.49407e-22	9.01083e-32	0.22822
FC-MZUSP	Leporinus octofasciatus	88919	2128.92	336.475	0.24654	4.05614	0.838819	0.00527165	0.00111402	0.400263	0.696212	0.98785	0.258079	-2.35897e-22	1.15439e-31	0.225677
FC-MZUSP	Leporinus octofasciatus	89639	1279	337.834	0.688596	1.45223	0.87106	0.00522931	0.000953099	0.421359	0.625262	0.988907	0.207176	-1.70574e-23	1.07033e-32	0.221359
FC-MZUSP	Leporinus octofasciatus	89755	2106.77	338.053	0.254116	3.9352	0.833411	0.00522255	0.00104246	0.402227	0.728134	0.987548	0.278404	-9.39426e-22	7.46022e-32	0.228568
FC-MZUSP	Leporinus octofasciatus	90207	1285.59	338.903	0.685878	1.45799	0.865378	0.00519638	0.00101404	0.419737	0.696212	0.987134	0.248571	-3.39169e-22	3.8326e-32	0.222156
FC-MZUSP	Leporinus octofasciatus	92047	2192.16	342.342	0.240699	4.15457	0.859666	0.00509251	0.000871624	0.285244	0.835116	0.990797	0.153525	1.96727e-22	2.4009e-32	0.222155
FC-MZUSP	Leporinus octofasciatus	92325	1501.27	342.858	0.514769	1.94262	0.822092	0.00507717	0.000965191	0.34563	0.835116	0.985682	0.233542	3.0941e-22	6.87551e-32	0.219314
FC-MZUSP	Leporinus octofasciatus	96659	2142.83	350.813	0.26453	3.78028	0.842212	0.00484952	0.00072727	0.372058	0.835116	0.986969	0.27482	2.13185e-23	2.52482e-33	0.214939
FC-MZUSP	Leporinus octofasciatus	101783	1372.03	359.992	0.679449	1.47178	0.887895	0.00460539	0.000497107	0.397268	0.835116	0.986873	0.189173	7.78003e-24	2.72944e-33	0.207631
FC-MZUSP	Leporinus octofasciatus	81778	1784	322.681	0.32289	3.09703	0.813541	0.00573198	0.00311225	0.417345	0.999295	0.96137	0.34589	6.61147e-19	9.21115e-29	0.225965
FC-MZUSP	Leporinus octofasciatus	86004	1564.54	330.913	0.441524	2.26488	0.833081	0.00545033	0.000963128	0.396947	0.625262	0.994144	0.107619	-1.6807e-22	2.4684e-32	0.231523
FC-MZUSP	Leporinus octofasciatus	88630	1715.13	335.927	0.378615	2.6412	0.808108	0.00528884	0.000851995	0.417729	0.625262	0.993821	0.109825	-5.65772e-23	9.57969e-32	0.235615
FC-MZUSP	Leporinus octofasciatus	89122	1605.45	336.859	0.43451	2.30144	0.855306	0.00525964	0.000786442	0.384457	0.661976	0.992598	0.133024	-7.04626e-22	1.60358e-32	0.217131
FC-MZUSP	Leporinus octofasciatus	90605	1720.18	339.65	0.384781	2.59888	0.885005	0.00517356	0.000742405	0.375103	0.661976	0.992548	0.119181	-1.16736e-21	-4.7638e-34	0.212474
FC-MZUSP	Leporinus octofasciatus	93655	1314.82	345.319	0.680784	1.46889	0.870966	0.00500507	0.000689824	0.393581	0.625262	0.993481	0.138964	3.29235e-23	9.57069e-33	0.221404
FC-MZUSP	Leporinus octofasciatus	95877	1319.26	349.391	0.692249	1.44457	0.879589	0.00488908	0.000600981	0.415067	0.625262	0.994092	0.135597	-4.65797e-24	1.41423e-33	0.218766
FC-MZUSP	Leporinus octofasciatus	100782	1346.21	358.217	0.698825	1.43097	0.863488	0.00465113	0.000402942	0.359205	0.661976	0.993428	0.137018	1.82627e-23	6.36551e-33	0.219898
FC-MZUSP	Leporinus octumaculatus	101976	1320.43	360.333	0.734979	1.36058	0.892139	0.00459667	0.000363249	0.431296	0.661976	0.992886	0.122615	-8.30106e-23	-9.05352e-34	0.208403
FC-MZUSP	Leporinus octumaculatus	75291	1917.54	309.618	0.257315	3.88628	0.782049	0.00622584	0.0020931	0.341618	0.661976	0.994614	0.100727	1.13939e-21	1.01638e-31	0.265352
FC-MZUSP	Leporinus octumaculatus	82582	1225.93	324.263	0.690499	1.44823	0.919079	0.00567618	0.00128562	0.33294	0.661976	0.992775	0.134937	-1.1694e-22	3.54625e-33	0.214042
FC-MZUSP	Leporinus octumaculatus	85915	1287.75	330.742	0.651055	1.53597	0.821933	0.00545597	0.00135865	0.379525	0.661976	0.992353	0.182832	-6.07607e-23	9.07556e-33	0.23805
FC-MZUSP	Leporinus octumaculatus	59948	1243.02	276.276	0.487561	2.05103	0.796038	0.00781928	0.00471652	0.381864	0.696212	0.991053	0.107928	5.95335e-23	-1.05514e-34	0.28512
FC-MZUSP	Leporinus octumaculatus	59468	1307.45	275.167	0.437165	2.28746	0.778183	0.00788239	0.00492255	0.380236	0.696212	0.991621	0.125355	4.33295e-22	3.61361e-34	0.299856
FC-MZUSP	Leporinus octumaculatus	66469	1326.37	290.914	0.474785	2.10622	0.784702	0.00705216	0.00309397	0.350694	0.696212	0.991465	0.106934	1.55143e-22	1.3091e-34	0.275802
FC-MZUSP	Leporinus octumaculatus	81329	1881.88	321.794	0.288584	3.4652	0.775951	0.00576363	0.00166979	0.354672	0.585873	0.988075	0.214971	5.46601e-22	1.35942e-31	0.260614
FC-MZUSP	Leporinus octumaculatus	87039	1949.66	332.899	0.287744	3.47532	0.790523	0.00538552	0.00125115	0.349184	0.585873	0.986767	0.25914	7.27199e-22	1.26148e-31	0.252135
FC-MZUSP	Leporinus octumaculatus	90906	1371.02	340.213	0.607736	1.64545	0.802065	0.00515643	0.000911216	0.322967	0.661976	0.989228	0.199524	4.67534e-22	1.89451e-31	0.248871
FC-MZUSP	Leporinus octumaculatus	92854	1350.55	343.839	0.639718	1.56319	0.832831	0.00504825	0.000887402	0.350572	0.543564	0.986163	0.236708	-2.95278e-22	1.18127e-31	0.235374
FC-MZUSP	Leporinus octumaculatus	93798	1355.24	345.583	0.64176	1.55822	0.798818	0.00499744	0.000770245	0.323369	0.696212	0.989802	0.223308	1.8804e-23	1.35573e-32	0.247897
FC-MZUSP	Leporinus octumaculatus	57721	1394.09	271.095	0.373217	2.6794	0.726873	0.00812096	0.00443308	0.369189	0.696212	0.990517	0.205238	1.12496e-22	7.60011e-32	0.301399
FC-MZUSP	Leporinus octumaculatus	84344	1758.72	327.704	0.342664	2.91831	0.827705	0.0055576	0.00115665	0.32217	0.543564	0.987308	0.115522	3.0971e-22	3.49939e-32	0.242136
FC-MZUSP	Leporinus octumaculatus	89862	1298.63	338.254	0.669595	1.49344	0.881899	0.00521633	0.000883072	0.351491	0.585873	0.987147	0.165957	3.31471e-23	3.83665e-33	0.217965
FC-MZUSP	Leporinus octumaculatus	93293	1351.81	344.651	0.641549	1.55873	0.84974	0.00502449	0.000685462	0.331594	0.543564	0.990769	0.117093	2.52916e-23	4.23973e-33	0.229724
FC-MZUSP	Leporinus octumaculatus	94019	1351.61	345.989	0.646734	1.54623	0.850389	0.00498569	0.000688843	0.345014	0.585873	0.990595	0.138187	9.82037e-24	2.80632e-33	0.22671
FC-MZUSP	Leporinus octumaculatus	95675	1361.91	349.023	0.648207	1.54272	0.838681	0.0048994	0.000652003	0.324936	0.661976	0.990622	0.143425	2.52269e-23	6.8805e-33	0.229161
FC-MZUSP	Leporinus octumaculatus	98156	1360.63	353.52	0.66626	1.50092	0.856233	0.00477556	0.000519929	0.34081	0.585873	0.99233	0.132172	3.75861e-25	4.63321e-34	0.223063
FC-MZUSP	Leporinus octumaculatus	98390	1357.56	353.941	0.670873	1.49059	0.864861	0.0047642	0.000510425	0.390399	0.498028	0.991903	0.145823	7.28877e-25	2.23424e-34	0.220429
FC-MZUSP	Leporinus pachycheilus	100065	1365.48	356.941	0.674406	1.48279	0.845451	0.00468446	0.000431512	0.335199	0.696212	0.993713	0.142732	-4.79332e-24	4.7895e-34	0.226813
FC-MZUSP	Leporinus pachycheilus	100561	1345.04	357.824	0.698508	1.43162	0.857429	0.00466135	0.00040254	0.383456	0.661976	0.991307	0.156658	-8.18005e-24	7.14092e-34	0.221271
FC-MZUSP	Leporinus pachycheilus	101575	1343.81	359.624	0.706844	1.41474	0.876145	0.00461482	0.000398421	0.381542	0.661976	0.992012	0.152197	-2.42611e-24	1.42529e-34	0.215032
FC-MZUSP	Leporinus pachycheilus	103048	1359.1	362.222	0.701051	1.42643	0.868028	0.00454885	0.000340261	0.354518	0.728134	0.993185	0.117444	5.74528e-25	2.89453e-34	0.219591
FC-MZUSP	Leporinus pachycheilus	86599	1289.29	332.056	0.654672	1.52748	0.819205	0.00541288	0.00126071	0.385838	0.625262	0.988428	0.253358	-3.64132e-22	6.21549e-32	0.231936
FC-MZUSP	Leporinus pachycheilus	92547	1323.95	343.27	0.663484	1.5072	0.825531	0.00506499	0.000813439	0.327737	0.585873	0.991833	0.165146	-4.78353e-23	1.16659e-32	0.229954
FC-MZUSP	Leporinus pachycheilus	92632	1299.93	343.428	0.688859	1.45168	0.851131	0.00506035	0.000839982	0.397916	0.661976	0.989715	0.201546	-6.27767e-23	3.64481e-32	0.221875
FC-MZUSP	Leporinus pachycheilus	87609	1303.66	333.987	0.64778	1.54374	0.825814	0.00535048	0.0011798	0.32934	0.585873	0.989975	0.208672	5.89146e-23	1.77323e-32	0.236625
FC-MZUSP	Leporinus pachycheilus	85823	1307.18	330.565	0.631166	1.58437	0.798316	0.00546182	0.00126587	0.331117	0.696212	0.989922	0.211646	8.79774e-23	5.16538e-32	0.251298
FC-MZUSP	Leporinus pachycheilus	91636	1320.92	341.577	0.659969	1.51522	0.82546	0.00511535	0.000867963	0.352347	0.661976	0.988763	0.234845	2.85439e-23	1.79589e-32	0.234213
FC-MZUSP	Leporinus pachycheilus	95565	1338.25	348.823	0.670555	1.4913	0.833755	0.00490504	0.000647133	0.336628	0.661976	0.990092	0.209967	-2.10231e-22	-3.15771e-33	0.228305
FC-MZUSP	Leporinus pachycheilus	35024	1099.05	211.173	0.364368	2.74448	0.719637	0.0133837	0.0295173	0.644413	0.99718	0.982665	0.0710777	2.70188e-20	-1.47907e-30	0.250918
FC-MZUSP	Leporinus pachycheilus	41111	1628.6	228.788	0.194778	5.13404	0.718686	0.0114021	0.0220846	0.658568	0.999295	0.981667	0.0496408	-2.75527e-20	-2.67207e-30	0.232726
FC-MZUSP	Leporinus pachycheilus	49737	1562.7	251.649	0.255941	3.90715	0.799245	0.00942457	0.0128082	0.556415	0.982317	0.974014	0.0721637	1.88869e-20	9.9929e-31	0.199966
FC-MZUSP	Leporinus pachycheilus	55633	1265.64	266.147	0.43644	2.29127	0.88644	0.00842575	0.00950653	0.521038	1	0.972912	0.0619716	2.07505e-19	5.22724e-28	0.194851
FC-MZUSP	Leporinus pachycheilus	45998	1451.89	242.005	0.27421	3.64684	0.772206	0.0101907	0.0170243	0.634992	0.988699	0.977113	0.0921972	-8.94564e-21	-4.30838e-29	0.232714
FC-MZUSP	Leporinus parae	53038	1294.02	259.866	0.398028	2.51238	0.812569	0.008838	0.0110333	0.554424	1	0.976191	0.12127	-8.10952e-20	5.7246e-30	0.210593
FC-MZUSP	Leporinus parae	54503	1258.81	263.43	0.432226	2.3136	0.89465	0.00860044	0.00886697	0.50512	0.993651	0.979408	0.103258	2.22382e-21	1.89448e-30	0.196472
FC-MZUSP	Leporinus parae	49062	1718.82	249.935	0.208686	4.79189	0.809444	0.00955424	0.0144976	0.61083	0.965202	0.972932	0.12117	4.37155e-20	-5.23786e-32	0.197735
FC-MZUSP	Leporinus parae	57964	1451.38	271.665	0.345786	2.89196	0.90044	0.00808692	0.00869076	0.526406	0.993651	0.971989	0.14	2.3034e-20	2.59296e-30	0.201166
FC-MZUSP	Leporinus parae	10196	491.019	113.938	0.531426	1.88173	0.925647	0.0459739	0.31845	0.592974	0.982317	0.98314	0.103793	4.50566e-20	1.2336e-27	0.219373
FC-MZUSP	Leporinus parae	55212	2147.42	265.138	0.150457	6.64644	0.76015	0.00849	0.0107987	0.588956	0.928362	0.978719	0.127803	-6.64202e-20	-3.33387e-28	0.231509
FC-MZUSP	Leporinus parae	47806	1436.79	246.715	0.291008	3.43633	0.772522	0.00980525	0.0133043	0.549479	0.99718	0.980404	0.0843943	-2.93051e-20	-1.83286e-30	0.197062
FC-MZUSP	Leporinus parae	32083	920.767	202.112	0.475539	2.10288	0.909279	0.0146105	0.033792	0.620222	0.999295	0.981614	0.0927485	1.46564e-20	1.03455e-28	0.266792
FC-MZUSP	Leporinus parae	35992	1000.36	214.071	0.451959	2.21259	0.830419	0.0130237	0.0250709	0.579586	0.999295	0.979015	0.103609	6.68632e-20	1.28994e-29	0.271411
FC-MZUSP	Leporinus parae	38095	998.909	220.236	0.479762	2.08437	0.860107	0.0123048	0.0238296	0.619835	0.993651	0.981726	0.0786466	3.73782e-21	3.05989e-31	0.240492
FC-MZUSP	Leporinus parae	39082	1159.8	223.071	0.365105	2.73894	0.781218	0.011994	0.0224915	0.613002	0.99718	0.980969	0.080284	5.7826e-21	7.81035e-32	0.239977
FC-MZUSP	Leporinus parae	87530	1313.46	333.836	0.637575	1.56844	0.814422	0.00535531	0.00144205	0.359652	0.728134	0.987063	0.31254	6.46442e-22	3.03463e-31	0.233635
FC-MZUSP	Leporinus parae	89408	1338.09	337.399	0.627502	1.59362	0.794011	0.00524282	0.00110733	0.359927	0.728134	0.990515	0.215489	2.01483e-23	2.58089e-32	0.250142
FC-MZUSP	Leporinus parae	94116	1351.28	346.168	0.647714	1.54389	0.804933	0.00498056	0.000896449	0.324088	0.696212	0.989614	0.24005	9.27441e-22	5.1845e-31	0.232778
FC-MZUSP	Leporinus parae	94281	1361.12	346.471	0.639501	1.56372	0.805876	0.00497184	0.000818305	0.317329	0.728134	0.991092	0.199591	4.67983e-22	2.29569e-31	0.238801
FC-MZUSP	Leporinus parae	97313	1356.75	351.998	0.664323	1.50529	0.821006	0.00481693	0.000503411	0.358385	0.661976	0.992873	0.133241	2.55274e-23	1.25012e-32	0.240993
FC-MZUSP	Leporinus parae	83753	1275.36	326.554	0.647058	1.54546	0.830833	0.00559681	0.00168363	0.405448	0.696212	0.988047	0.298037	2.67819e-22	3.07235e-31	0.23797
FC-MZUSP	Leporinus paranensis	86792	1317.56	332.426	0.62827	1.59167	0.814505	0.00540084	0.00139585	0.338682	0.585873	0.986651	0.293066	4.08509e-22	1.83815e-31	0.240699
FC-MZUSP	Leporinus paranensis	88473	1306.76	335.63	0.651072	1.53593	0.830982	0.00529823	0.0011313	0.329475	0.585873	0.989807	0.248638	-1.58076e-22	1.88589e-32	0.23253
FC-MZUSP	Leporinus paranensis	94790	1323.61	347.405	0.679916	1.47077	0.858691	0.00494514	0.000782847	0.324477	0.78556	0.989281	0.241805	-1.04405e-23	6.9051e-33	0.222357
FC-MZUSP	Leporinus paranensis	87254	1325.95	333.31	0.623652	1.60346	0.792563	0.00537225	0.00120889	0.364153	0.696212	0.987497	0.285689	-4.96516e-22	3.28653e-31	0.254439
FC-MZUSP	Leporinus paranensis	87676	2225.54	334.115	0.222443	4.49554	0.801785	0.00534639	0.00124703	0.401341	0.661976	0.98925	0.263868	-1.88359e-21	6.88792e-31	0.236569
FC-MZUSP	Leporinus paranensis	93585	1326.53	345.19	0.668312	1.49631	0.829044	0.00500882	0.000993576	0.388376	0.811278	0.986484	0.337703	1.06971e-21	9.92433e-31	0.226691
FC-MZUSP	Leporinus paranensis	95040	1333.91	347.863	0.671221	1.48982	0.834021	0.00493213	0.000807245	0.336653	0.696212	0.987502	0.268104	-3.09613e-22	-1.02279e-33	0.233822
FC-MZUSP	Leporinus paranensis	97209	1342.11	351.81	0.678175	1.47455	0.836609	0.00482208	0.00062829	0.435092	0.696212	0.990649	0.211855	-3.02258e-23	6.03582e-32	0.23019
FC-MZUSP	Leporinus paranensis	97359	1352.07	352.081	0.669253	1.4942	0.8359	0.00481466	0.000630558	0.323839	0.585873	0.988788	0.224962	-4.75916e-24	1.11449e-32	0.23297
FC-MZUSP	Leporinus paranensis	60642	1500.64	277.87	0.338399	2.95509	0.846541	0.00772979	0.00442384	0.432776	0.696212	0.988315	0.258262	-4.59473e-22	5.37861e-32	0.256113
FC-MZUSP	Leporinus pearsoni	62808	1361.77	282.789	0.425614	2.34954	0.872976	0.00746322	0.00397769	0.445813	0.757878	0.987582	0.262322	3.67777e-22	-4.39294e-32	0.255047
FC-MZUSP	Leporinus pearsoni	69237	1902.41	296.91	0.240404	4.15967	0.7618	0.00677022	0.00342287	0.455723	0.696212	0.990444	0.212047	5.58138e-22	-2.25996e-32	0.266537
FC-MZUSP	Leporinus pearsoni	78006	1266.58	315.151	0.611048	1.63653	0.798342	0.00600915	0.00214072	0.448651	0.625262	0.988232	0.276558	5.16229e-23	6.76224e-32	0.257109
FC-MZUSP	Leporinus pearsoni	50107	1543.2	252.583	0.264401	3.78213	0.782115	0.00935498	0.012298	0.557378	0.999295	0.979655	0.0956057	-3.74679e-20	5.33641e-30	0.212923
FC-MZUSP	Leporinus pearsoni	57598	1417.54	270.806	0.360204	2.7762	0.870744	0.0081383	0.00865154	0.522947	0.954434	0.973281	0.15335	1.7244e-21	2.17643e-30	0.207417
FC-MZUSP	Leporinus pearsoni	61447	1631.62	279.708	0.29005	3.44768	0.82939	0.00762853	0.00679949	0.477469	0.974489	0.974781	0.125865	-4.34016e-20	9.90787e-30	0.213028
FC-MZUSP	Leporinus pearsoni	60302	1577.04	277.09	0.304687	3.28206	0.691077	0.00777337	0.00371999	0.363325	0.696212	0.98534	0.333943	4.52006e-22	8.59662e-32	0.296481
FC-MZUSP	Leporinus pearsoni	68826	2008.93	296.027	0.214305	4.66626	0.752443	0.00681065	0.00352113	0.447311	0.728134	0.990679	0.233041	8.63608e-22	3.48948e-32	0.275075
FC-MZUSP	Leporinus pearsoni	70731	1775.88	300.096	0.281834	3.54819	0.767381	0.00662722	0.00324115	0.444536	0.696212	0.989475	0.25274	3.80817e-22	-8.12584e-33	0.261057
FC-MZUSP	Leporinus pearsoni	73649	2223.4	306.223	0.187215	5.34145	0.750678	0.00636465	0.0026332	0.407619	0.696212	0.989595	0.237343	5.45944e-22	3.62294e-33	0.261154
FC-MZUSP	Leporinus pearsoni	75650	2094.35	310.356	0.216731	4.61401	0.77746	0.0061963	0.00241541	0.424923	0.696212	0.989452	0.258371	6.80807e-22	1.49879e-31	0.258426
FC-MZUSP	Leporinus pearsoni	55803	1296.14	266.553	0.417411	2.39572	0.895125	0.00840009	0.00816823	0.487901	0.912999	0.979397	0.112581	-4.91203e-21	-3.45898e-32	0.197797
FC-MZUSP	Leporinus pearsoni	44014	1261.62	236.728	0.347491	2.87777	0.811917	0.01065	0.0185268	0.635058	0.982317	0.978668	0.109958	3.32593e-20	1.36389e-30	0.233651
FC-MZUSP	Leporinus pearsoni	85526	2039.6	329.993	0.258355	3.87064	0.78581	0.00548079	0.00123029	0.325815	0.696212	0.991039	0.200593	-7.73975e-22	3.00154e-31	0.241684
FC-MZUSP	Leporinus pearsoni	72429	1768.25	303.677	0.291096	3.43529	0.761297	0.00647186	0.00259483	0.390894	0.757878	0.991672	0.206992	1.03857e-21	1.78775e-31	0.265438
FC-MZUSP	Leporinus piau	72431	1916.73	303.681	0.247749	4.03635	0.769037	0.00647168	0.002832	0.41735	0.757878	0.990495	0.199298	1.34449e-21	1.05123e-31	0.256654
FC-MZUSP	Leporinus piau	49650	1857.95	251.429	0.180742	5.53274	0.734239	0.00944109	0.0146307	0.641945	0.988699	0.980127	0.115088	-1.41545e-18	-2.47199e-27	0.239127
FC-MZUSP	Leporinus piau	50862	2042.74	254.479	0.153171	6.52864	0.735042	0.00921611	0.01419	0.652266	0.988699	0.980942	0.11731	-4.02252e-18	-7.06934e-27	0.250305
FC-MZUSP	Leporinus piau	51816	1462.35	256.854	0.30449	3.28418	0.792221	0.00904643	0.0124834	0.606313	0.928362	0.981847	0.108321	-4.02508e-19	-4.03772e-28	0.234305
FC-MZUSP	Leporinus piau	53994	2384.97	262.197	0.119286	8.38323	0.702169	0.00868152	0.0123236	0.638365	0.993651	0.978804	0.107001	1.72422e-18	5.17642e-26	0.274116
FC-MZUSP	Leporinus piau	54073	1991.28	262.389	0.171366	5.83547	0.767973	0.00866884	0.0117154	0.608882	0.954434	0.975563	0.152715	2.0674e-19	-1.50981e-28	0.216171
FC-MZUSP	Leporinus piau	55126	1813.22	264.931	0.210699	4.7461	0.779364	0.00850325	0.0112737	0.612448	0.965202	0.980789	0.119148	3.40383e-19	3.48078e-27	0.234819
FC-MZUSP	Leporinus piau	59241	1839.14	274.642	0.220091	4.54358	0.809823	0.00791259	0.00925081	0.579554	0.988699	0.974637	0.15472	3.65725e-20	-1.18563e-29	0.222489
FC-MZUSP	Leporinus piau	61822	1441.49	280.561	0.373875	2.67469	0.844044	0.00758225	0.007954	0.562174	0.974489	0.979039	0.127953	1.53265e-19	1.11967e-28	0.210954
FC-MZUSP	Leporinus piau	82913	2151.14	324.912	0.225162	4.44125	0.799562	0.00565352	0.00161318	0.40674	0.757878	0.989296	0.217527	2.63639e-21	3.2521e-31	0.244056
FC-MZUSP	Leporinus piau	86095	2131	331.088	0.238244	4.19738	0.770839	0.00544457	0.00115019	0.317142	0.757878	0.990517	0.202891	9.71792e-22	2.95801e-31	0.263833
FC-MZUSP	Leporinus piau	96233	1346.63	350.04	0.66686	1.49957	0.829459	0.00487099	0.000585746	0.342556	0.696212	0.991465	0.179181	1.87049e-23	8.84916e-33	0.235484
FC-MZUSP	Leporinus piau	97595	1359.14	352.508	0.663913	1.50622	0.824979	0.00480301	0.000573046	0.333491	0.661976	0.992223	0.160468	9.73796e-24	6.09173e-33	0.237212
FC-MZUSP	Leporinus piau	82440	1988.83	323.984	0.26191	3.81811	0.779258	0.00568595	0.00140204	0.349461	0.661976	0.992986	0.134586	-2.96811e-21	7.75495e-32	0.247523
FC-MZUSP	Leporinus reinhardti	84711	2020.73	328.416	0.260695	3.8359	0.80218	0.00553352	0.00129053	0.347573	0.696212	0.992089	0.163943	-1.53076e-21	1.73939e-31	0.238232
FC-MZUSP	Leporinus reinhardti	84920	2059.03	328.821	0.251706	3.97289	0.767042	0.0055199	0.00120788	0.389126	0.696212	0.990806	0.181119	7.50982e-22	4.27785e-31	0.25292
FC-MZUSP	Leporinus reinhardti	87122	1322.78	333.057	0.625698	1.59822	0.803242	0.00538039	0.00123887	0.399573	0.661976	0.991329	0.196667	-6.46024e-22	4.74079e-31	0.242026
FC-MZUSP	Leporinus reinhardti	87459	1309.3	333.701	0.641112	1.55979	0.816214	0.00535965	0.00110478	0.408147	0.661976	0.990781	0.213358	1.37373e-22	1.99225e-31	0.238809
FC-MZUSP	Leporinus reinhardti	88213	2214.77	335.136	0.225987	4.42503	0.816477	0.00531384	0.00111346	0.346756	0.696212	0.991195	0.204135	-3.38985e-22	1.95406e-31	0.238472
FC-MZUSP	Leporinus reinhardti	88487	1306.37	335.656	0.651559	1.53478	0.819521	0.00529739	0.00106326	0.404587	0.625262	0.990954	0.21127	-1.9273e-22	1.99672e-31	0.236001
FC-MZUSP	Leporinus reinhardti	88842	1317.16	336.329	0.643502	1.554	0.81496	0.00527622	0.0010561	0.381605	0.696212	0.991027	0.218379	3.56584e-22	2.66182e-31	0.237954
FC-MZUSP	Leporinus reinhardti	90721	1321.02	339.867	0.65328	1.53074	0.810479	0.00516694	0.000893432	0.405059	0.625262	0.991618	0.182456	-6.33196e-23	1.13414e-31	0.242443
FC-MZUSP	Leporinus reinhardti	91319	1314.23	340.985	0.664395	1.50513	0.840032	0.0051331	0.000938958	0.375861	0.696212	0.990809	0.22995	3.51776e-22	1.47044e-31	0.2255
FC-MZUSP	Leporinus reinhardti	65090	1709.8	287.88	0.279792	3.57408	0.710279	0.00720157	0.00282514	0.344931	0.696212	0.990416	0.215731	8.71929e-22	1.4407e-31	0.297004
FC-MZUSP	Leporinus reinhardti	82069	2353.65	323.255	0.186168	5.37149	0.767251	0.00571166	0.00176318	0.348299	0.728134	0.989411	0.257911	1.24632e-21	4.28771e-31	0.250852
FC-MZUSP	Leporinus reinhardti	85659	2112.76	330.249	0.241148	4.14683	0.770502	0.00547228	0.00119685	0.32628	0.757878	0.990734	0.212882	9.80961e-22	3.13935e-31	0.25803
FC-MZUSP	Leporinus reinhardti	86802	1333.56	332.445	0.613355	1.63038	0.77303	0.00540022	0.00120039	0.324817	0.661976	0.989966	0.242966	2.71706e-22	3.40223e-31	0.257463
FC-MZUSP	Leporinus reinhardti	55652	1439.29	266.192	0.337595	2.96213	0.775746	0.00842288	0.00599561	0.438111	0.877437	0.990247	0.160994	3.78714e-21	4.62824e-32	0.308418
FC-MZUSP	Leporinus reinhardti	55842	1331.09	266.646	0.396058	2.52488	0.847195	0.00839422	0.0058185	0.447817	0.857148	0.990576	0.155439	1.40894e-20	-3.59786e-30	0.285682
FC-MZUSP	Leporinus reinhardti	57510	1327.96	270.599	0.409813	2.44013	0.885328	0.00815076	0.00585388	0.436255	0.835116	0.987072	0.225564	2.62401e-21	-2.53095e-30	0.261506
FC-MZUSP	Leporinus reinhardti	61289	1570.88	279.348	0.312107	3.20403	0.741486	0.00764819	0.0042269	0.390429	0.835116	0.989562	0.169674	3.24135e-21	2.46839e-31	0.295379
FC-MZUSP	Leporinus reinhardti	66248	2022.77	290.43	0.203464	4.91487	0.718221	0.00707569	0.00415317	0.426945	0.912999	0.987311	0.199699	2.49019e-21	3.43624e-31	0.290625
FC-MZUSP	Leporinus reinhardti	67414	1925.76	292.975	0.228431	4.37769	0.695248	0.0069533	0.003743	0.440165	0.857148	0.989452	0.162431	3.88375e-21	2.18174e-30	0.292587
FC-MZUSP	Leporinus reinhardti	69371	1853.9	297.197	0.253638	3.94263	0.758825	0.00675715	0.00338141	0.40381	0.912999	0.988358	0.179532	5.02649e-21	7.18913e-31	0.270649
FC-MZUSP	Leporinus reinhardti	74467	2061.04	307.919	0.220293	4.53941	0.770952	0.00629473	0.00284184	0.402213	0.857148	0.98434	0.268797	-1.03366e-20	2.35304e-30	0.261454
FC-MZUSP	Leporinus reinhardti	80921	1895.08	320.986	0.283151	3.53168	0.776697	0.00579269	0.00156821	0.433197	0.696212	0.990246	0.182857	-1.45124e-21	4.07972e-31	0.250234
FC-MZUSP	Leporinus reinhardti	95850	1357.56	349.342	0.653554	1.53009	0.826236	0.00489045	0.000600247	0.327663	0.728134	0.992881	0.159649	1.02608e-23	4.35996e-33	0.233894
FC-MZUSP	Leporinus reinhardti	91651	1335.81	341.605	0.645446	1.54932	0.819791	0.00511451	0.000928468	0.320542	0.728134	0.991808	0.187861	-1.47183e-23	4.22283e-32	0.235829
FC-MZUSP	Leporinus reinhardti	58851	1369.59	273.736	0.394261	2.53639	0.802113	0.00796503	0.00503579	0.403387	0.696212	0.991228	0.155806	1.51549e-22	1.75076e-33	0.281972
FC-MZUSP	Leporinus reinhardti	9113	422.09	107.717	0.642777	1.55575	0.902456	0.0088884	0.0112748	0.56623	0.993651	0.974366	0.0877448	-1.80383e-21	9.90806e-33	0.184671
FC-MZUSP	Leporinus reticulatus	9599	416.919	110.552	0.693957	1.44101	0.919973	0.00843838	0.00940384	0.534682	0.965202	0.973667	0.0981191	-4.91599e-22	2.92769e-33	0.177222
FC-MZUSP	Leporinus reticulatus	9636	419.948	110.765	0.686618	1.45641	0.928503	0.00840598	0.00973763	0.547954	0.993651	0.970959	0.12197	-1.72249e-22	1.18396e-33	0.168687
FC-MZUSP	Leporinus reticulatus	9915	428.877	112.357	0.677387	1.47626	0.914415	0.00816944	0.00871438	0.525277	0.896038	0.971402	0.10733	-4.63283e-22	1.75223e-32	0.177511
FC-MZUSP	Leporinus reticulatus	9938	414.09	112.488	0.728314	1.37303	0.944049	0.00815053	0.00829228	0.508891	0.954434	0.973052	0.0968586	-6.98002e-22	6.45379e-33	0.17448
FC-MZUSP	Leporinus reticulatus	10147	443.99	113.664	0.646847	1.54596	0.904125	0.00798265	0.00817021	0.518755	0.877437	0.973027	0.102676	-1.01462e-21	9.06407e-33	0.186275
FC-MZUSP	Leporinus reticulatus	10262	447.019	114.307	0.645341	1.54957	0.894682	0.0078932	0.00788722	0.516666	0.982317	0.973515	0.103839	-7.04981e-22	1.02362e-32	0.180395
FC-MZUSP	Leporinus reticulatus	10526	424.191	115.768	0.735107	1.36035	0.932495	0.00769523	0.00698303	0.487487	0.857148	0.972107	0.102482	-2.62572e-22	-3.74438e-35	0.172562
FC-MZUSP	Leporinus reticulatus	10987	435.806	118.275	0.726946	1.37562	0.934189	0.00737235	0.00611203	0.467301	0.954434	0.971772	0.095986	-3.74628e-22	2.02535e-32	0.171261
FC-MZUSP	Leporinus reticulatus	7424	374.333	97.2241	0.665781	1.502	0.929161	0.0109106	0.0196662	0.644686	0.974489	0.975642	0.0836727	-4.04869e-23	8.6314e-35	0.191021
FC-MZUSP	Leporinus reticulatus	8025	385.605	101.083	0.678218	1.47445	0.918297	0.0100935	0.0158581	0.607799	0.993651	0.973512	0.0836727	-4.81155e-22	-1.06116e-33	0.194049
FC-MZUSP	Leporinus reticulatus	8548	417.647	104.325	0.615823	1.62384	0.899032	0.0094759	0.0136556	0.592698	1	0.971208	0.0988947	-2.91379e-23	1.47969e-35	0.197116
FC-MZUSP	Leporinus reticulatus	9266	437.546	108.618	0.608211	1.64417	0.896392	0.00874164	0.010969	0.561253	0.993651	0.97036	0.113729	5.36134e-23	6.13101e-35	0.199124
FC-MZUSP	Leporinus reticulatus	9420	430.132	109.517	0.639819	1.56294	0.897485	0.00859873	0.0103386	0.550697	0.988699	0.974416	0.0912352	1.66691e-22	-1.52706e-33	0.187742
FC-MZUSP	Leporinus reticulatus	9425	432.96	109.546	0.631822	1.58272	0.905032	0.00859416	0.0102671	0.546519	0.974489	0.971084	0.101416	-7.19751e-23	1.9777e-34	0.193284
FC-MZUSP	Leporinus sexstriatus	9474	437.061	109.83	0.623246	1.6045	0.884676	0.00854972	0.0103351	0.553042	0.99718	0.969226	0.103452	-1.16242e-22	3.95256e-34	0.186964
FC-MZUSP	Leporinus sexstriatus	9742	392.96	111.373	0.792794	1.26136	0.962934	0.00831451	0.00874994	0.503395	0.993651	0.970493	0.0958891	5.09996e-24	4.82534e-34	0.167955
FC-MZUSP	Leporinus sexstriatus	9754	447.688	111.441	0.611563	1.63516	0.889801	0.00830429	0.00934212	0.535017	0.99718	0.974133	0.0879387	-1.46398e-22	6.24095e-34	0.198561
FC-MZUSP	Leporinus sexstriatus	9815	440.132	111.789	0.636699	1.5706	0.907536	0.00825267	0.00908805	0.525901	0.993651	0.971131	0.0958891	1.95768e-23	1.99399e-36	0.192414
FC-MZUSP	Leporinus sexstriatus	9868	434.96	112.091	0.65545	1.52567	0.908237	0.00820835	0.0090076	0.526233	0.982317	0.970408	0.117316	1.76303e-22	4.03464e-33	0.188059
FC-MZUSP	Leporinus sexstriatus	9832	413.889	111.886	0.721246	1.38649	0.939243	0.00823841	0.0088119	0.517455	0.974489	0.970433	0.104906	-3.69783e-23	3.44901e-34	0.17341
FC-MZUSP	Leporinus sexstriatus	7146	361.362	95.3864	0.687681	1.45416	0.92052	0.011335	0.021698	0.658472	0.99718	0.977336	0.0697111	-7.11223e-22	-1.87614e-34	0.184689
FC-MZUSP	Leporinus sexstriatus	8325	442.534	102.955	0.534196	1.87197	0.909737	0.00972973	0.0147171	0.610865	0.928362	0.980147	0.0827031	2.00202e-20	3.83135e-31	0.276071
FC-MZUSP	Leporinus sexstriatus	9707	465.605	111.173	0.562677	1.77722	0.918528	0.00834449	0.00955655	0.550304	0.928362	0.980585	0.0849331	1.54081e-22	1.29575e-32	0.257392
FC-MZUSP	Leporinus sexstriatus	10128	543.019	113.558	0.431621	2.31685	0.853675	0.00799763	0.009007	0.554272	0.942163	0.973232	0.11751	-4.57714e-21	8.0365e-33	0.258156
FC-MZUSP	Leporinus sexstriatus	11680	719.588	121.949	0.283456	3.52789	0.816612	0.00693493	0.0072778	0.586054	0.982317	0.972119	0.163176	1.78574e-22	1.07394e-31	0.234727
FC-MZUSP	Leporinus sexstriatus	13675	656.576	131.953	0.398628	2.50861	0.922553	0.00592322	0.00461459	0.516479	0.974489	0.96899	0.207097	1.76802e-19	4.7497e-29	0.220161
FC-MZUSP	Leporinus sexstriatus	13009	638.86	128.7	0.400537	2.49665	0.886715	0.00622646	0.00548257	0.549509	0.877437	0.969386	0.228524	8.18874e-20	-2.55163e-29	0.232864
FC-MZUSP	Leporinus sexstriatus	13201	621.747	129.646	0.42913	2.3303	0.897844	0.0061359	0.0053105	0.550852	0.912999	0.974535	0.145433	4.43368e-19	-9.03978e-30	0.223099
FC-MZUSP	Leporinus sexstriatus	13845	577.706	132.77	0.521302	1.91827	0.941965	0.00585049	0.00419621	0.484198	0.857148	0.967896	0.194784	9.27471e-19	1.06009e-27	0.210731
FC-MZUSP	Leporinus sexstriatus	10055	541.179	113.148	0.43143	2.31787	0.85735	0.00805569	0.0099336	0.591013	0.99718	0.971573	0.143106	2.21631e-19	3.85569e-29	0.226971
FC-MZUSP	Leporinus sexstriatus	14624	622.877	136.455	0.473665	2.1112	0.865325	0.00553884	0.00415706	0.520761	0.993651	0.963944	0.220962	2.37021e-19	7.11693e-28	0.215276
FC-MZUSP	Leporinus sexstriatus	8972	438.09	106.881	0.587451	1.70227	0.917946	0.00902809	0.0121074	0.593288	0.928362	0.980085	0.0887144	-2.35738e-22	-8.69184e-34	0.239322
FC-MZUSP	Leporinus sexstriatus	8232	415.848	102.378	0.5982	1.67168	0.905611	0.00983965	0.0158386	0.637235	0.988699	0.977587	0.0668024	-1.86976e-24	1.34185e-33	0.197308
FC-MZUSP	Leporinus sexstriatus	8439	448.777	103.657	0.526551	1.89915	0.873331	0.00959829	0.0148038	0.626576	0.99718	0.98117	0.0706806	4.56062e-21	-1.50209e-32	0.23162
FC-MZUSP	Leporinus steindachneri	8877	463.161	106.313	0.520009	1.92304	0.865373	0.0091247	0.012819	0.600419	1	0.978003	0.0659298	3.04308e-22	5.52262e-33	0.259701
FC-MZUSP	Leporinus steindachneri	9242	474.676	108.477	0.515443	1.94008	0.885758	0.00876434	0.0112426	0.576285	0.974489	0.980069	0.0756254	5.14939e-21	6.16789e-31	0.273087
FC-MZUSP	Leporinus steindachneri	1200	135.113	39.0882	0.826036	1.2106	0.988468	0.0675	0.695187	0.596731	0.928362	0.979136	0.109172	1.86979e-19	-9.1684e-30	0.184307
FC-MZUSP	Leporinus steindachneri	9119	483.948	107.753	0.489282	2.04381	0.869387	0.00888255	0.0125903	0.626736	0.928362	0.982267	0.09395	1.51019e-21	3.49918e-31	0.223404
FC-MZUSP	Leporinus steindachneri	12338	616.718	125.336	0.407645	2.45312	0.867712	0.00656508	0.00651696	0.585453	0.912999	0.975665	0.147663	2.34462e-19	3.73399e-29	0.194182
FC-MZUSP	Leporinus steindachneri	12949	517.664	128.402	0.607226	1.64683	0.945459	0.00625531	0.00522855	0.519916	0.896038	0.969647	0.204479	3.68026e-21	6.51972e-30	0.192221
FC-MZUSP	Leporinus steindachneri	13064	580.191	128.971	0.48769	2.05048	0.897684	0.00620024	0.00567813	0.568833	0.896038	0.97195	0.171224	1.77216e-19	7.70992e-29	0.18648
FC-MZUSP	Leporinus steindachneri	13497	586.978	131.091	0.492271	2.0314	0.906691	0.00600133	0.0046146	0.50109	0.857148	0.968859	0.190712	-4.70829e-20	2.77242e-30	0.215444
FC-MZUSP	Leporinus steindachneri	13629	662.617	131.731	0.390075	2.56361	0.849212	0.00594321	0.00500625	0.552164	0.912999	0.973172	0.168897	1.73826e-20	1.26517e-31	0.197801
FC-MZUSP	Leporinus steindachneri	14073	650.576	133.859	0.417831	2.39331	0.882375	0.0057557	0.00472957	0.551386	0.965202	0.967386	0.252957	-1.79448e-20	1.87509e-29	0.199982
FC-MZUSP	Leporinus steindachneri	14442	692.617	135.603	0.378312	2.64332	0.87379	0.00560864	0.00453992	0.55426	0.912999	0.96565	0.27167	-6.04765e-20	1.03029e-28	0.201416
FC-MZUSP	Leporinus steindachneri	15066	852.316	138.501	0.260619	3.83701	0.86121	0.00537634	0.00438271	0.584485	0.835116	0.971568	0.184894	8.18652e-21	9.11013e-30	0.199753
FC-MZUSP	Leporinus steindachneri	15582	609.362	140.853	0.527329	1.89635	0.92294	0.00519831	0.0032252	0.464777	0.974489	0.959479	0.26401	-4.76098e-22	-9.37906e-31	0.199755
FC-MZUSP	Leporinus steindachneri	8909	474.032	106.505	0.498224	2.00713	0.887086	0.00909193	0.0136778	0.644089	0.942163	0.976808	0.162982	4.36698e-21	-1.70478e-31	0.226191
FC-MZUSP	Leporinus steindachneri	11413	588.718	120.547	0.413805	2.4166	0.824281	0.00709717	0.00750303	0.582449	0.912999	0.972925	0.256157	-4.81519e-20	2.28379e-29	0.25462
FC-MZUSP	Leporinus steindachneri	11765	553.789	122.391	0.482074	2.07437	0.854021	0.00688483	0.00647414	0.533911	0.928362	0.969152	0.216114	-8.19192e-21	-1.35435e-31	0.239517
FC-MZUSP	Leporinus steindachneri	11770	546.635	122.417	0.494985	2.02026	0.921187	0.0068819	0.00598562	0.503983	0.928362	0.969137	0.254557	2.63357e-21	6.5485e-31	0.204567
FC-MZUSP	Leporinus steindachneri	11859	553.12	122.879	0.487101	2.05296	0.905336	0.00683026	0.00571752	0.487438	0.928362	0.967526	0.243843	2.22696e-21	5.04177e-31	0.216527
FC-MZUSP	Leporinus steindachneri	11958	571.262	123.391	0.460466	2.17171	0.864517	0.00677371	0.005799	0.495811	0.928362	0.96493	0.306186	2.49251e-21	1.19495e-30	0.21805
FC-MZUSP	Leporinus steindachneri	12071	548.174	123.973	0.504797	1.98099	0.856281	0.0067103	0.00603594	0.530552	0.896038	0.968994	0.228718	-6.11325e-21	4.28397e-32	0.230466
FC-MZUSP	Leporinus steindachneri	12125	603.103	124.25	0.418899	2.38721	0.857072	0.00668041	0.00627618	0.54874	0.928362	0.967539	0.270506	-3.09642e-21	1.48712e-31	0.218146
FC-MZUSP	Leporinus steindachneri	12138	575.404	124.316	0.460692	2.17065	0.874181	0.00667326	0.00546755	0.490905	0.942163	0.969172	0.251697	7.25968e-21	3.60333e-31	0.210997
FC-MZUSP	Leporinus steindachneri	12226	533.706	124.766	0.539375	1.854	0.900096	0.00662522	0.00551575	0.502353	0.928362	0.968582	0.28025	-6.0663e-21	-3.21615e-31	0.213981
FC-MZUSP	Leporinus steindachneri	12646	603.546	126.891	0.436257	2.29223	0.877707	0.00640519	0.00506253	0.489639	0.912999	0.96441	0.27516	6.04967e-21	9.56702e-31	0.228553
FC-MZUSP	Leporinus steindachneri	11128	566.174	119.032	0.436242	2.2923	0.841819	0.00727894	0.00811783	0.598117	0.974489	0.977925	0.10956	-1.56595e-21	-5.59808e-33	0.233909
FC-MZUSP	Leporinus steindachneri	12053	756.558	123.88	0.264618	3.77903	0.82634	0.00672032	0.00774027	0.653963	0.942163	0.969198	0.240353	-5.68109e-19	5.43719e-28	0.204826
FC-MZUSP	Leporinus steindachneri	13140	841.144	129.346	0.23338	4.28485	0.779175	0.00616438	0.00667761	0.667441	0.982317	0.970955	0.185767	6.22905e-18	7.86658e-27	0.212188
FC-MZUSP	Leporinus striatus	9612	442.333	110.627	0.617341	1.61985	0.905255	0.00842697	0.0103639	0.577253	0.896038	0.978401	0.125848	1.53631e-24	2.47485e-34	0.206845
FC-MZUSP	Leporinus striatus	9809	455.161	111.755	0.594982	1.68072	0.894818	0.00825772	0.00991107	0.574041	0.896038	0.979273	0.123424	-2.0726e-22	7.09521e-34	0.211162
FC-MZUSP	Leporinus striatus	8909	497.304	106.505	0.452684	2.20904	0.844375	0.00909193	0.0136035	0.637113	0.954434	0.975992	0.104324	-5.82319e-22	3.16781e-32	0.234743
FC-MZUSP	Leporinus striatus	9619	488.86	110.667	0.505791	1.9771	0.858686	0.00842083	0.0107725	0.594847	0.896038	0.976645	0.12992	-5.11543e-22	-6.15081e-33	0.20756
FC-MZUSP	Leporinus striatus	10599	538.333	116.168	0.459592	2.17584	0.895413	0.00764223	0.00876117	0.587486	0.912999	0.978506	0.124491	1.55216e-22	2.17145e-32	0.196793
FC-MZUSP	Leporinus striatus	10770	451.321	117.102	0.664438	1.50503	0.945898	0.00752089	0.00769591	0.537977	0.835116	0.975745	0.135738	2.01259e-22	1.18802e-32	0.181546
FC-MZUSP	Leporinus striatus	10894	517.848	117.774	0.510497	1.95888	0.906398	0.00743529	0.00796375	0.561177	0.912999	0.975019	0.139519	4.09558e-21	-1.66618e-33	0.193677
FC-MZUSP	Leporinus striatus	14757	676.517	137.074	0.405183	2.46802	0.883071	0.0370502	0.200597	0.57649	0.974489	0.979202	0.099725	-3.93913e-17	1.68073e-26	0.233801
FC-MZUSP	Leporinus striatus	36618	1233.23	215.925	0.302561	3.30512	0.836333	0.0149312	0.0391273	0.695798	0.974489	0.991585	0.0321818	-4.9685e-22	-6.30637e-31	0.255628
FC-MZUSP	Leporinus striatus	68626	2203.55	295.597	0.177604	5.63051	0.817142	0.0079671	0.00581465	0.388187	0.999295	0.964453	0.189668	-1.97602e-20	1.95375e-29	0.225875
FC-MZUSP	Leporinus striatus	3110	335.48	62.9267	0.347245	2.87981	0.721745	0.175804	3.6046	0.48418	0.982317	0.974255	0.134442	-3.47788e-18	9.62855e-26	0.377798
FC-MZUSP	Leporinus striatus	29453	967.11	193.651	0.39572	2.52704	0.866469	0.0185635	0.0645395	0.734666	0.942163	0.991482	0.029876	2.93801e-20	2.74375e-29	0.275994
FC-MZUSP	Leporinus striatus	33390	984.24	206.188	0.433136	2.30874	0.919581	0.0163747	0.0472037	0.695885	0.993651	0.99191	0.0240325	-9.50281e-22	3.65199e-31	0.276024
FC-MZUSP	Leporinus striatus	34901	1053.39	210.802	0.395245	2.53008	0.831511	0.0156657	0.0433685	0.694241	0.965202	0.988525	0.0459168	1.50582e-22	1.29932e-31	0.258192
FC-MZUSP	Leporinus striatus	35300	1129.54	212.003	0.347684	2.87618	0.847967	0.0154887	0.0414684	0.678216	0.965202	0.987919	0.0437255	-2.88688e-21	6.45482e-29	0.286075
FC-MZUSP	Leporinus striatus	37517	1248.77	218.559	0.302322	3.30773	0.676726	0.0145734	0.0364937	0.686179	1	0.98809	0.0438472	-7.72588e-19	1.79668e-26	0.365652
FC-MZUSP	Leporinus striatus	34779	1049.94	210.433	0.39646	2.52232	0.875825	0.0157207	0.0435142	0.693786	0.954434	0.990063	0.0351752	-6.79068e-22	6.05881e-31	0.318193
FC-MZUSP	Leporinus striatus	40726	1615.73	227.715	0.19604	5.10099	0.599502	0.0134251	0.0302278	0.665518	0.974489	0.987621	0.0459454	-3.31281e-18	6.54448e-27	0.360608
FC-MZUSP	Leporinus taeniatus	41527	1207.56	229.943	0.357868	2.79433	0.799611	0.0131661	0.027602	0.631357	0.999295	0.987147	0.0460671	-4.13148e-21	3.22196e-31	0.261721
FC-MZUSP	Leporinus taeniatus	43984	1557.79	236.648	0.227766	4.39047	0.650237	0.0124307	0.0258436	0.673123	0.999295	0.988706	0.0431454	5.84656e-20	3.47795e-29	0.319714
FC-MZUSP	Leporinus taeniatus	49413	1901.89	250.828	0.171664	5.82534	0.593485	0.0110649	0.0180519	0.585172	0.99718	0.982627	0.0927	-6.52981e-19	2.31553e-29	0.314395
FC-MZUSP	Leporinus taeniatus	49752	1622.69	251.687	0.237437	4.21164	0.586719	0.0109895	0.0175557	0.583339	0.988699	0.984536	0.0661611	-5.55194e-19	1.01949e-28	0.321806
FC-MZUSP	Leporinus taeniatus	59902	2158.76	276.17	0.161525	6.19097	0.655261	0.00912741	0.0109857	0.526564	0.99718	0.979894	0.0870571	-2.46146e-19	1.65795e-28	0.310173
FC-MZUSP	Leporinus taeniatus	88650	3168.03	335.965	0.110996	9.00929	0.736504	0.00616751	0.00384149	0.417426	0.988699	0.967996	0.125784	7.36615e-18	3.895e-26	0.227451
FC-MZUSP	Leporinus taeniatus	4753	441.563	77.7927	0.306331	3.26444	0.765378	0.115033	2.03697	0.586062	0.954434	0.967194	0.157006	1.20212e-17	-4.12603e-26	0.210573
FC-MZUSP	Leporinus taeniatus	12186	556.836	124.562	0.493875	2.0248	0.893795	0.0448671	0.323853	0.623839	0.999295	0.975977	0.160859	4.95123e-16	6.2469e-24	0.238898
FC-MZUSP	Leporinus taeniatus	25091	1277.03	178.737	0.193343	5.17216	0.65185	0.0217907	0.069184	0.576205	0.982317	0.970631	0.161704	9.8117e-19	-7.04277e-25	0.762487
FC-MZUSP	Leporinus taeniatus	39047	1289.44	222.971	0.29512	3.38846	0.719601	0.0140024	0.0344211	0.68854	0.988699	0.987077	0.0434319	3.35217e-21	1.80208e-29	0.355001
FC-MZUSP	Leporinus taeniatus	42894	1059.49	233.697	0.480185	2.08253	0.876371	0.0127465	0.026734	0.645607	0.954434	0.980352	0.0928647	7.89375e-21	1.31116e-30	0.252512
FC-MZUSP	Leporinus taeniatus	51979	1287.82	257.258	0.393847	2.53906	0.765861	0.0105187	0.0154179	0.557523	0.993651	0.983215	0.0789221	1.81674e-19	4.42812e-29	0.30656
FC-MZUSP	Leporinus taeniatus	53249	1653.38	260.382	0.244779	4.08532	0.756013	0.0102678	0.0151718	0.578298	0.988699	0.984501	0.0835911	-4.18653e-19	3.17075e-27	0.306865
FC-MZUSP	Leporinus taeniatus	56512	1707.59	268.241	0.243547	4.10599	0.815763	0.00967494	0.0119263	0.521973	0.982317	0.986449	0.0663831	1.20342e-20	3.62263e-29	0.218926
FC-MZUSP	Leporinus taeniatus	58511	1411.42	272.944	0.369093	2.70934	0.788176	0.0093444	0.0112116	0.514295	0.982317	0.980864	0.0732506	5.02486e-20	1.63872e-29	0.218886
FC-MZUSP	Leporinus taeniatus	4245	313.238	73.518	0.543676	1.83933	0.856019	0.128799	1.96817	0.481144	0.982317	0.964822	0.306372	-1.49183e-19	1.68481e-28	0.244619
FC-MZUSP	Leporinus taeniatus	15130	693.061	138.795	0.395827	2.52635	0.890105	0.0361368	0.180781	0.577414	0.954434	0.977204	0.0877374	9.10655e-21	2.98533e-29	0.2666
FC-MZUSP	Leporinus taeniatus	23545	829.262	173.143	0.430254	2.32421	0.951929	0.0232215	0.0691665	0.509923	0.999295	0.973882	0.118079	-4.69295e-19	1.43792e-28	0.301048
FC-MZUSP	Leporinus taeniatus	23861	1273.05	174.301	0.185015	5.40497	0.813286	0.022914	0.0689745	0.502884	0.942163	0.97027	0.148349	5.24714e-18	8.67595e-27	0.417215
FC-MZUSP	Leporinus taeniatus	24435	1125.23	176.385	0.242517	4.12343	0.883438	0.0223757	0.0683432	0.523374	0.988699	0.970177	0.143322	8.98659e-17	1.09571e-24	0.346477
FC-MZUSP	Leporinus taeniatus	38344	993.98	220.955	0.487699	2.05044	0.913039	0.0142591	0.0334733	0.652753	0.857148	0.987089	0.0462462	1.00249e-22	-1.56543e-32	0.276146
FC-MZUSP	Leporinus taeniofasciatus	43225	1264.16	234.597	0.33989	2.94213	0.762736	0.0126489	0.0219771	0.545996	0.965202	0.976356	0.111791	-5.40621e-19	-1.2898e-28	0.316865
FC-MZUSP	Leporinus taeniofasciatus	68264	2226.3	294.816	0.173076	5.77782	0.72619	0.00800935	0.0088602	0.543129	0.988699	0.973164	0.117621	-2.28202e-18	-2.73397e-28	0.234975
FC-MZUSP	Leporinus taeniofasciatus	74235	2458.24	307.439	0.154372	6.47786	0.739702	0.00736512	0.00748976	0.547268	0.988699	0.972061	0.146451	-1.36971e-18	1.2419e-27	0.259556
FC-MZUSP	Leporinus taeniofasciatus	27565	1080.96	187.342	0.296448	3.37328	0.8637	0.0198349	0.0589532	0.584289	0.988699	0.969055	0.206339	-2.34107e-19	-2.38546e-27	0.413449
FC-MZUSP	Leporinus taeniofasciatus	29618	828.098	194.193	0.542753	1.84246	0.943429	0.0184601	0.0634964	0.730889	0.835116	0.990923	0.0291312	2.58487e-23	-7.68584e-32	0.248499
FC-MZUSP	Leporinus taeniofasciatus	34986	1000.48	211.058	0.439223	2.27675	0.817869	0.0156277	0.0428803	0.688806	0.954434	0.989356	0.0437828	-3.83351e-23	1.13383e-31	0.240196
FC-MZUSP	Leporinus taeniofasciatus	37120	1042.79	217.4	0.428966	2.33118	0.822148	0.0147293	0.0367252	0.669821	0.857148	0.989647	0.0479935	-4.31271e-20	3.47281e-30	0.290441
FC-MZUSP	Leporinus taeniofasciatus	41706	1110.21	230.438	0.425208	2.35179	0.849946	0.0131096	0.0282739	0.64797	0.982317	0.984347	0.0615995	-7.97849e-21	1.41865e-31	0.218231
FC-MZUSP	Leporinus taeniofasciatus	15802	693.37	141.844	0.41304	2.42107	0.920058	0.0346001	0.166173	0.548965	0.942163	0.98329	0.0528916	4.70928e-19	2.05591e-27	0.352375
FC-MZUSP	Leporinus taeniofasciatus	31511	1077.51	200.302	0.341058	2.93205	0.903256	0.0173511	0.0523722	0.688358	0.965202	0.989806	0.0344662	1.65673e-20	-3.86616e-28	0.374645
FC-MZUSP	Leporinus taeniofasciatus	35246	1406.89	211.841	0.223768	4.46891	0.567953	0.0155124	0.0397907	0.64577	0.78556	0.980085	0.123485	2.05518e-18	1.43688e-26	0.389182
FC-MZUSP	Leporinus taeniofasciatus	42922	1308.15	233.773	0.315193	3.17265	0.808248	0.0127382	0.0253358	0.616066	0.999295	0.987699	0.0426943	2.0673e-22	1.44e-29	0.224559
FC-MZUSP	Leporinus taeniofasciatus	46341	1437.92	242.906	0.281647	3.55054	0.589183	0.0117984	0.0201547	0.576679	0.999295	0.987444	0.0503065	4.44261e-18	8.17766e-28	0.446991
FC-MZUSP	Leporinus taeniofasciatus	47294	1387.9	245.391	0.30853	3.24118	0.804634	0.0115607	0.0200624	0.596994	0.965202	0.987659	0.0410043	-1.39835e-19	4.29006e-29	0.238466
FC-MZUSP	Leporinus taeniofasciatus	52126	1513.22	257.622	0.286063	3.49573	0.772271	0.010489	0.0153931	0.560106	0.965202	0.985282	0.0487669	-1.34477e-19	2.34165e-29	0.262503
FC-MZUSP	Leporinus taeniofasciatus	58824	1830.88	273.673	0.220518	4.53478	0.660669	0.00929468	0.0114714	0.532797	0.99718	0.978853	0.0775185	-3.27651e-18	-2.17658e-27	0.250855
FC-MZUSP	Leporinus taeniofasciatus	4646	298.652	76.9121	0.654574	1.52771	0.909554	0.117682	1.79338	0.514062	0.982317	0.975998	0.124316	-3.34416e-19	-1.68339e-30	0.195816
FC-MZUSP	Leporinus taeniofasciatus	8272	557.747	102.627	0.334153	2.99264	0.867905	0.0660965	0.4743	0.444601	0.99718	0.969901	0.191014	2.67229e-20	-4.3129e-30	0.193099
FC-MZUSP	Leporinus taeniofasciatus	68707	1858.86	295.771	0.249871	4.00207	0.787355	0.0079577	0.00725136	0.466688	0.999295	0.97378	0.118057	-5.47032e-21	1.91098e-30	0.230855
FC-MZUSP	Leporinus thayeri	78818	1987.58	316.787	0.250719	3.98853	0.646675	0.00693687	0.00454392	0.390898	0.942163	0.964327	0.244357	1.70697e-19	1.55877e-28	0.293367
FC-MZUSP	Leporinus thayeri	80047	2596.99	319.248	0.149147	6.70479	0.711485	0.00683036	0.00505077	0.461757	0.965202	0.968808	0.194595	-1.18523e-18	3.17007e-28	0.251312
FC-MZUSP	Leporinus thayeri	27883	890.198	188.419	0.442157	2.26164	0.895235	0.0196087	0.0725953	0.74204	0.965202	0.993407	0.0299046	-4.56859e-20	2.84375e-28	0.361183
FC-MZUSP	Leporinus thayeri	31854	926.666	201.39	0.466152	2.14522	0.853812	0.0171642	0.0524568	0.702342	0.99718	0.991275	0.0485807	-2.0047e-21	2.00694e-32	0.295375
FC-MZUSP	Leporinus thayeri	32382	903.571	203.052	0.498413	2.00637	0.953562	0.0168844	0.0501061	0.696761	0.988699	0.992757	0.0291312	-7.15038e-22	-8.3334e-31	0.300555
FC-MZUSP	Leporinus thayeri	32653	900.34	203.9	0.506197	1.97551	0.906273	0.0167443	0.0490876	0.691412	0.993651	0.99043	0.0459311	-4.24718e-23	5.25827e-32	0.272441
FC-MZUSP	Leporinus thayeri	42642	1222.44	233.01	0.358585	2.78874	0.750422	0.0128219	0.0246854	0.597393	0.942163	0.987064	0.0577826	-8.46143e-20	-1.32355e-29	0.356646
FC-MZUSP	Leporinus thayeri	3366	316.066	65.4654	0.423417	2.36174	0.817586	0.162433	3.63819	0.55008	0.988699	0.982555	0.0778193	-2.96206e-19	1.40657e-29	0.215313
FC-MZUSP	Leporinus thayeri	38954	1293.55	222.706	0.292545	3.41827	0.654414	0.0140358	0.0342413	0.681163	0.999295	0.986722	0.0741385	-8.40918e-20	-2.25096e-29	0.373226
FC-MZUSP	Leporinus thayeri	39250	1202.97	223.55	0.340833	2.93399	0.695145	0.0139299	0.03187	0.648442	0.928362	0.988603	0.0566512	7.20029e-20	3.13089e-29	0.379489
FC-MZUSP	Leporinus thayeri	53985	1642.69	262.175	0.251404	3.97767	0.720338	0.0101278	0.0140344	0.545514	0.999295	0.980997	0.0965097	-2.9262e-23	1.39232e-31	0.259622
FC-MZUSP	Leporinus thayeri	18656	916.541	154.122	0.279077	3.58324	0.64132	0.0293069	0.152453	0.696621	0.99718	0.987463	0.0430165	-3.1317e-17	1.20534e-25	0.283798
FC-MZUSP	Leporinus thayeri	23593	775.688	173.319	0.492741	2.02946	0.959221	0.0231742	0.100489	0.742169	0.99718	0.991116	0.0353972	-1.03501e-18	-1.54353e-27	0.322778
FC-MZUSP	Leporinus thayeri	28507	901.169	190.516	0.441112	2.267	0.886081	0.0191795	0.0694234	0.741223	0.928362	0.994326	0.0206382	-1.40535e-21	-4.20347e-33	0.348451
FC-MZUSP	Leporinus thayeri	28951	914.894	191.994	0.434642	2.30075	0.965323	0.0188854	0.0412946	0.492033	0.928362	0.974519	0.140443	-3.78096e-20	1.33172e-29	0.332652
FC-MZUSP	Leporinus thayeri	31575	1033.11	200.506	0.371758	2.68992	0.869116	0.0173159	0.0540376	0.708342	0.988699	0.990286	0.0469551	-1.30867e-20	-3.90754e-29	0.338804
FC-MZUSP	Leporinus thayeri	33003	1215.72	204.99	0.280606	3.56372	0.669649	0.0165667	0.0499239	0.714905	0.99718	0.990917	0.0310647	-8.02555e-20	9.7215e-28	0.437424
FC-MZUSP	Leporinus thayeri	33459	1222.75	206.401	0.281221	3.55592	0.672394	0.0163409	0.0465508	0.690339	0.993651	0.987567	0.0516599	1.72032e-18	1.54059e-26	0.442745
FC-MZUSP	Leporinus thayeri	36407	1440.05	215.302	0.220619	4.53271	0.690638	0.0150177	0.040137	0.698659	0.835116	0.985975	0.0685529	-2.62191e-17	-2.42133e-25	0.36662
FC-MZUSP	Leporinus thayeri	38167	1186.34	220.444	0.340784	2.93441	0.713615	0.0143252	0.0350833	0.668439	0.728134	0.982981	0.0821732	-4.15272e-17	-2.60268e-25	0.350298
FC-MZUSP	Leporinus thayeri	5110	290.669	80.6614	0.760034	1.31573	0.976309	0.106996	1.44194	0.500385	0.857148	0.976956	0.100219	-5.29173e-19	-8.75668e-29	0.184036
FC-MZUSP	Leporinus tigrinus	43831	1580.96	236.236	0.220369	4.53784	0.605467	0.012474	0.0247688	0.627737	0.999295	0.984534	0.0493397	1.24228e-18	-5.61118e-28	0.390703
FC-MZUSP	Leporinus tigrinus	49929	1252.57	252.134	0.39991	2.50057	0.75728	0.0109505	0.0165223	0.550227	0.999295	0.981842	0.0609049	1.45466e-19	2.13114e-29	0.327653
FC-MZUSP	Leporinus tigrinus	52331	1268.71	258.128	0.40855	2.44768	0.751958	0.0104479	0.0145068	0.53342	1	0.981449	0.0683166	-1.00449e-19	3.67202e-28	0.320572
FC-MZUSP	Leporinus tigrinus	65333	1624.57	288.417	0.311074	3.21467	0.875425	0.00836867	0.00901284	0.520904	0.974489	0.96945	0.223654	-8.65973e-20	-1.12961e-29	0.213769
FC-MZUSP	Leporinus tigrinus	72567	2562.79	303.966	0.138843	7.20239	0.687871	0.00753442	0.00691934	0.488508	0.928362	0.969744	0.184426	-4.21447e-19	3.31318e-29	0.263518
FC-MZUSP	Leporinus tigrinus	80029	2459.92	319.212	0.166194	6.01706	0.706134	0.0068319	0.00615474	0.521443	0.857148	0.961176	0.349983	-1.33388e-19	5.05085e-28	0.254694
FC-MZUSP	Leporinus tigrinus	85010	2866	328.996	0.130055	7.68905	0.76549	0.0064316	0.00435315	0.43576	0.965202	0.966673	0.209375	-5.27734e-20	1.15632e-28	0.211834
FC-MZUSP	Leporinus tigrinus	35125	1144.56	211.477	0.336938	2.9679	0.909079	0.0155658	0.0369279	0.582848	0.974489	0.962117	0.338618	-9.68212e-19	4.11115e-28	0.417375
FC-MZUSP	Leporinus tigrinus	53857	1787.17	261.864	0.211896	4.7193	0.743183	0.0101519	0.0128676	0.489405	0.99718	0.968224	0.202243	2.08647e-19	3.41959e-28	0.223139
FC-MZUSP	Leporinus tigrinus	78092	2227.76	315.325	0.197733	5.05731	0.721024	0.00700136	0.0057623	0.463344	0.999295	0.958189	0.261823	-1.26109e-21	6.62236e-31	0.235068
FC-MZUSP	Leporinus tigrinus	46256	1355.72	242.683	0.316255	3.162	0.698868	0.0118201	0.0195681	0.573397	0.993651	0.983498	0.0763155	-2.28158e-18	1.18811e-28	0.356537
FC-MZUSP	Leporinus tigrinus	47162	1345.48	245.048	0.327378	3.05457	0.730978	0.011593	0.0178632	0.536472	0.99718	0.982617	0.0981066	-5.9926e-19	1.5836e-29	0.346064
FC-MZUSP	Leporinus tigrinus	48014	1376.67	247.252	0.318361	3.14108	0.735238	0.0113873	0.0178641	0.546139	0.99718	0.982635	0.101057	-2.47959e-19	-1.72291e-31	0.331393
FC-MZUSP	Leporinus tigrinus	31672	906.843	200.813	0.483973	2.06623	0.949828	0.0172629	0.0529927	0.701031	0.982317	0.993218	0.0259517	-5.53251e-22	1.3113e-32	0.316561
FC-MZUSP	Leporinus tigrinus	31767	1024.26	201.114	0.380512	2.62804	0.818758	0.0172113	0.0530388	0.705662	1	0.991637	0.044506	-6.98818e-22	3.86933e-31	0.350138
FC-MZUSP	Leporinus tigrinus	36297	1032.58	214.976	0.42779	2.33759	0.885314	0.0150632	0.0383279	0.670373	0.974489	0.991446	0.0356335	-3.05625e-21	3.2018e-31	0.325163
FC-MZUSP	Leporinus tigrinus	64812	1652.31	287.265	0.298319	3.35212	0.813955	0.00843594	0.00801041	0.47677	0.974489	0.983287	0.109264	8.51812e-23	7.33114e-32	0.217568
FC-MZUSP	Leporinus tigrinus	70257	1894.42	299.089	0.246007	4.06493	0.765343	0.00778214	0.00660577	0.463921	0.942163	0.982389	0.12572	1.27613e-22	-1.96707e-31	0.220648
FC-MZUSP	Leporinus tigrinus	78419	1662.2	315.984	0.35667	2.80371	0.849012	0.00697216	0.00481005	0.423483	0.988699	0.977886	0.213228	-5.45332e-22	3.05284e-33	0.197731
FC-MZUSP	Leporinus trifasciatus	36124	1081.36	214.463	0.388207	2.57595	0.96959	0.0151354	0.0283138	0.49773	0.988699	0.961806	0.33165	-7.4932e-20	1.96189e-28	0.417987
FC-MZUSP	Leporinus trifasciatus	75215	2653.7	309.462	0.134218	7.45057	0.667658	0.00726916	0.00667943	0.505055	1	0.97305	0.192511	-9.95941e-19	5.28865e-28	0.264356
FC-MZUSP	Leporinus trifasciatus	78831	2659.98	316.813	0.140007	7.14248	0.760491	0.00693572	0.00615874	0.513498	0.928362	0.963376	0.290961	9.66802e-20	5.7679e-27	0.254219
FC-MZUSP	Leporinus trifasciatus	1050	150.912	36.5637	0.579367	1.72602	0.857143	0.520714	41.8819	0.610195	0.99718	0.98539	0.0725201	-2.33911e-20	-1.54685e-28	0.204842
FC-MZUSP	Leporinus trifasciatus	2242	219.497	53.4285	0.584772	1.71007	0.983333	0.243867	8.16406	0.545579	0.993651	0.982892	0.09888	1.17556e-20	1.4583e-30	0.256643
FC-MZUSP	Leporinus trifasciatus	37642	1013.52	218.923	0.460489	2.17161	0.826026	0.014525	0.0343244	0.642954	0.993651	0.987781	0.0565796	-7.08924e-21	2.20568e-31	0.295865
FC-MZUSP	Leporinus trifasciatus	39756	1214.36	224.986	0.338777	2.95179	0.642013	0.0137526	0.030963	0.644633	0.999295	0.986304	0.069491	1.57382e-19	2.78053e-29	0.382249
FC-MZUSP	Leporinus trifasciatus	45139	1342.12	239.735	0.314904	3.17557	0.756009	0.0121126	0.0223299	0.602719	0.993651	0.988126	0.0543453	-1.13746e-19	-4.5081e-30	0.314608
FC-MZUSP	Leporinus trifasciatus	37961	1131.15	219.849	0.372826	2.68222	0.816787	0.0144029	0.0340628	0.650515	0.965202	0.988529	0.0716035	-3.31097e-21	5.37963e-32	0.310668
FC-MZUSP	Leporinus trifasciatus	42053	1214.51	231.395	0.358267	2.79121	0.849281	0.0130015	0.027129	0.63481	0.988699	0.986104	0.0509582	-7.94019e-21	1.87233e-29	0.258389
FC-MZUSP	Leporinus trifasciatus	10278	503.765	114.396	0.508936	1.96488	0.86261	0.0531961	0.349185	0.488124	0.999295	0.968701	0.185686	-1.64546e-20	2.0074e-30	0.253227
FC-MZUSP	Leporinus trifasciatus	35039	934.742	211.218	0.503939	1.98437	0.912997	0.015604	0.0419824	0.675301	0.928362	0.984492	0.0768096	-5.57081e-22	4.12966e-31	0.258961
FC-MZUSP	Leporinus unitaeniatus	41700	1179.19	230.422	0.376857	2.65353	0.836342	0.0131115	0.0276656	0.632396	1	0.983561	0.0698705	-9.91609e-21	-1.87407e-30	0.328864
FC-MZUSP	Leporinus unitaeniatus	44804	1096.12	238.844	0.468607	2.13398	0.901416	0.0122032	0.022528	0.597874	0.988699	0.980232	0.106428	1.81357e-20	6.39629e-30	0.267359
FC-MZUSP	Leporinus unitaeniatus	52925	1297.62	259.589	0.394981	2.53177	0.803647	0.0103307	0.0147303	0.545853	0.988699	0.982054	0.113073	-1.88533e-20	-1.28898e-31	0.245986
FC-MZUSP	Leporinus unitaeniatus	65440	2022.32	288.653	0.201073	4.97332	0.792003	0.00835498	0.00977208	0.545513	0.942163	0.966638	0.251096	3.84185e-21	1.18338e-29	0.205769
FC-MZUSP	Leporinus unitaeniatus	71381	1608.87	301.472	0.346536	2.8857	0.818467	0.0076596	0.00644372	0.43803	0.988699	0.95871	0.353363	4.63935e-19	6.45244e-28	0.217231
FC-MZUSP	Leporinus unitaeniatus	74812	2676.61	308.632	0.131223	7.62061	0.729845	0.00730832	0.00638283	0.473008	0.993651	0.962898	0.269571	4.91098e-21	8.18321e-29	0.242099
FC-MZUSP	Leporinus unitaeniatus	75721	2242.22	310.501	0.189265	5.2836	0.777168	0.00722059	0.00657367	0.493066	0.912999	0.965042	0.30625	-2.15436e-20	5.07136e-30	0.213501
FC-MZUSP	Leporinus unitaeniatus	85586	2305.99	330.108	0.202255	4.94426	0.773128	0.00638831	0.0038662	0.384067	0.928362	0.956099	0.296346	-6.08964e-20	2.54179e-29	0.24662
FC-MZUSP	Leporinus unitaeniatus	1040	145.598	36.3891	0.616499	1.62206	0.934412	0.525721	41.1567	0.594845	0.942163	0.988447	0.0735083	-2.8516e-21	3.81312e-33	0.248707
FC-MZUSP	Leporinus unitaeniatus	38577	913.37	221.625	0.581092	1.7209	0.941913	0.014173	0.0299919	0.589285	0.99718	0.981664	0.0996033	-2.86478e-20	1.73796e-29	0.232951
FC-MZUSP	Leporinus unitaeniatus	39995	1022.04	225.662	0.48115	2.07835	0.931872	0.0136705	0.0303423	0.640579	0.942163	0.985707	0.0679012	-1.45768e-22	7.03455e-33	0.251394
FC-MZUSP	Leporinus unitaeniatus	40134	1200.1	226.054	0.350174	2.85572	0.809137	0.0136231	0.0313264	0.661973	0.974489	0.987001	0.0495259	1.65119e-20	9.84226e-31	0.264261
FC-MZUSP	Leporinus unitaeniatus	40316	1338.43	226.565	0.282811	3.53594	0.634768	0.0135616	0.031064	0.660799	0.988699	0.983924	0.0604752	1.75529e-19	1.68253e-28	0.33151
FC-MZUSP	Leporinus unitaeniatus	42026	1450.05	231.32	0.251168	3.9814	0.750867	0.0130098	0.0277235	0.642084	0.974489	0.983871	0.0879379	3.53743e-20	1.51861e-31	0.338616
FC-MZUSP	Leporinus unitaeniatus	46323	1221.74	242.859	0.389988	2.56418	0.783476	0.011803	0.0211605	0.600544	0.974489	0.98541	0.0659892	2.93796e-20	1.96548e-29	0.304187
FC-MZUSP	Leporinus unitaeniatus	62912	1535.46	283.023	0.335325	2.98218	0.859724	0.00869071	0.00945469	0.485278	1	0.965819	0.272801	5.89438e-21	-8.10755e-31	0.18927
FC-MZUSP	Leporinus unitaeniatus	4561	344.024	76.2053	0.484274	2.06495	0.916231	0.119875	2.28917	0.630836	0.99718	0.986231	0.0494114	-1.03613e-20	-4.46154e-32	0.305721
FC-MZUSP	Leporinus unitaeniatus	5269	339.723	81.9066	0.573705	1.74306	0.854663	0.103767	1.54803	0.575329	0.999295	0.985174	0.0527198	-1.60991e-20	-1.40442e-32	0.182462
FC-MZUSP	Leporinus vanzoi	7190	417.38	95.6796	0.518652	1.92808	0.882859	0.0760431	0.833199	0.58359	0.993651	0.988718	0.0559279	-1.41445e-20	7.38537e-33	0.228423
FC-MZUSP	Leporinus vanzoi	30425	789.352	196.821	0.613619	1.62968	0.911856	0.0179704	0.051337	0.629588	0.999295	0.985196	0.0494758	1.90597e-20	5.78578e-31	0.202171
FC-MZUSP	Leporinus vanzoi	45459	1134.37	240.583	0.443935	2.25258	0.778981	0.0120273	0.0195864	0.543612	0.965202	0.981153	0.0918049	-2.17532e-20	9.91403e-32	0.232415
FC-MZUSP	Leporinus vanzoi	51372	1730.1	255.752	0.215672	4.63668	0.799266	0.010643	0.016706	0.582505	0.988699	0.980127	0.0885251	-4.90841e-21	1.50096e-32	0.204564
FC-MZUSP	Leporinus vanzoi	93433	2636.45	344.91	0.168916	5.92011	0.789263	0.00585179	0.00359284	0.415898	0.974489	0.961059	0.298352	1.32109e-20	2.03997e-30	0.199642
FC-MZUSP	Leporinus vanzoi	4214	281.622	73.2491	0.667683	1.49772	0.975237	0.129746	2.72054	0.644237	0.999295	0.988611	0.0547822	-2.1457e-21	7.93293e-32	0.195703
FC-MZUSP	Leporinus vanzoi	26184	841.436	182.588	0.464734	2.15177	0.82151	0.0208811	0.0844767	0.758868	0.988699	0.989776	0.0447782	-2.46121e-22	-1.93375e-32	0.194438
FC-MZUSP	Leporinus vanzoi	37569	1097.89	218.711	0.391674	2.55314	0.786769	0.0145532	0.0356637	0.668384	0.965202	0.988998	0.068825	-1.06079e-21	2.98519e-31	0.192269
FC-MZUSP	Leporinus vanzoi	38470	1244.76	221.318	0.312006	3.20506	0.742492	0.0142124	0.0336618	0.660161	0.999295	0.988266	0.0712455	-7.92407e-21	5.27804e-31	0.244799
FC-MZUSP	Leporinus vanzoi	39386	1023.26	223.937	0.472695	2.11553	0.829057	0.0138818	0.0309466	0.640221	0.974489	0.987719	0.0705795	-1.10315e-21	1.14181e-32	0.195344
FC-MZUSP	Leporinus vanzoi	43848	1051.74	236.282	0.498126	2.00752	0.835391	0.0124692	0.0230938	0.598615	0.974489	0.988143	0.0646931	-1.59084e-21	1.08631e-32	0.186638
FC-MZUSP	Leporinus vanzoi	49186	971.519	250.251	0.654861	1.52704	0.919984	0.011116	0.0162638	0.540283	0.99718	0.985094	0.0826674	-2.08928e-23	-1.7472e-34	0.175151
FC-MZUSP	Leporinus vanzoi	1302	138.083	40.7156	0.858102	1.16536	0.959469	0.419931	22.7971	0.496562	0.988699	0.969615	0.100778	8.42843e-18	-1.92766e-28	0.167474
FC-MZUSP	Leporinus yophorus	2199	187.882	52.9136	0.782823	1.27743	0.976032	0.248636	8.73475	0.564447	0.99718	0.984554	0.0846008	-8.06935e-21	-3.75507e-31	0.182382
FC-MZUSP	Leporinus yophorus	4204	304.066	73.1621	0.571395	1.7501	0.957849	0.130055	2.9411	0.683497	0.993651	0.98829	0.0518604	6.87949e-19	2.61872e-29	0.229588
FC-MZUSP	Leporinus yophorus	24944	891.085	178.212	0.394764	2.53316	0.881445	0.0219191	0.0954345	0.779632	0.974489	0.994702	0.0178597	-5.89998e-22	1.08128e-32	0.382578
FC-MZUSP	Leporinus yophorus	26979	957.352	185.339	0.369907	2.70339	0.812743	0.0202658	0.0799994	0.763442	0.988699	0.993374	0.0261665	-4.46654e-23	1.82784e-32	0.36804
FC-MZUSP	Leporinus yophorus	27869	971.612	188.372	0.370976	2.6956	0.87328	0.0196186	0.0737879	0.752675	0.99718	0.993295	0.0285512	-1.89182e-20	7.17806e-29	0.426022
FC-MZUSP	Leporinus yophorus	27970	1018.72	188.713	0.338679	2.95265	0.757974	0.0195477	0.0735851	0.755241	0.942163	0.994669	0.0205952	2.69331e-21	3.82738e-31	0.445851
FC-MZUSP	Leporinus yophorus	29039	955.169	192.285	0.399974	2.50016	0.879383	0.0188281	0.0667862	0.74151	0.999295	0.993038	0.0239609	-1.39322e-20	-1.60848e-31	0.358035
FC-MZUSP	Leporinus yophorus	29775	974.032	194.707	0.394381	2.53562	0.928814	0.0183627	0.0354852	0.429737	0.954434	0.967422	0.253702	5.27297e-20	3.07227e-28	0.418947
FC-MZUSP	Leporinus yophorus	33390	1029.82	206.188	0.395643	2.52753	0.8335	0.0163747	0.0474014	0.694694	0.988699	0.991945	0.0331844	-3.28484e-23	1.56213e-31	0.328214
FC-MZUSP	Leporinus yophorus	37557	1346.71	218.676	0.260225	3.84282	0.5971	0.0145579	0.0373633	0.691001	0.954434	0.986	0.0581908	2.98366e-20	3.12719e-27	0.333142
FC-MZUSP	Leporinus yophorus	40983	1384.83	228.432	0.268546	3.72375	0.71895	0.0133409	0.0293336	0.645597	0.974489	0.985876	0.0963593	-2.10507e-21	-1.01566e-33	0.259939
FC-MZUSP	Leporinus yophorus	1159	145.255	38.4146	0.690291	1.44866	0.948445	0.471743	38.2496	0.665172	0.993651	0.981929	0.171916	-2.21793e-18	6.72241e-28	0.210222
FC-MZUSP	Oligoplites palometa	26807	934.056	184.748	0.386111	2.58993	0.854216	0.0203958	0.0806306	0.760131	0.988699	0.994455	0.0213113	-1.6177e-22	3.34733e-32	0.392412
FC-MZUSP	Oligoplites palometa	26995	1092.18	185.394	0.284383	3.51638	0.762959	0.0202538	0.0804014	0.764634	0.982317	0.991165	0.0578328	5.85195e-19	4.31223e-28	0.430483
FC-MZUSP	Oligoplites palometa	27404	984.583	186.794	0.355238	2.81501	0.829444	0.0199515	0.0771376	0.759103	0.988699	0.993477	0.0254791	-1.17033e-22	-4.75047e-33	0.417427
FC-MZUSP	Oligoplites palometa	37532	1331.58	218.603	0.265998	3.75943	0.642121	0.0145676	0.0351078	0.64955	0.988699	0.984383	0.0698777	-1.43334e-18	4.91538e-28	0.405022
FC-MZUSP	Oligoplites palometa	40466	1406.53	226.987	0.25704	3.89044	0.653911	0.0135113	0.0299594	0.647109	0.954434	0.986727	0.0659463	3.04425e-19	4.62844e-29	0.367712
FC-MZUSP	Oligoplites palometa	7785	1179.7	99.5599	0.0702953	14.2257	0.20246	0.0702312	0.845763	0.675337	1	0.990595	0.0486451	5.75996e-20	3.63455e-29	2.86928
FC-MZUSP	Oligoplites palometa	32943	995.838	204.803	0.417442	2.39554	0.83652	0.0165968	0.0486338	0.695504	0.99718	0.992452	0.0300192	2.2606e-22	3.55002e-31	0.323097
FC-MZUSP	Oligoplites palometa	32979	1024.52	204.915	0.394824	2.53278	0.835059	0.0165787	0.0486229	0.693087	0.988699	0.988924	0.0828321	-2.11679e-22	6.32729e-33	0.316546
FC-MZUSP	Oligoplites palometa	34234	1153.28	208.778	0.323445	3.09171	0.705972	0.015971	0.0456064	0.704144	0.982317	0.991204	0.0625734	1.61908e-22	4.04362e-32	0.360691
FC-MZUSP	Oligoplites palometa	34610	1081.44	209.921	0.371886	2.68899	0.779698	0.0157975	0.0428067	0.677424	0.988699	0.989557	0.0530492	-1.2515e-20	-7.69989e-31	0.332399
FC-MZUSP	Oligoplites palometa	39201	1621.51	223.411	0.187356	5.33742	0.59605	0.0139473	0.034651	0.69801	0.965202	0.987945	0.0663258	-3.04292e-21	-3.30861e-32	0.318764
FC-MZUSP	Oligoplites palometa	43266	1309.72	234.708	0.316957	3.15501	0.681301	0.0126369	0.02441	0.608429	0.988699	0.988187	0.0523259	5.44358e-21	7.30571e-31	0.334256
FC-MZUSP	Oligoplites palometa	44690	1338.71	238.539	0.31336	3.19121	0.695532	0.0122343	0.0225341	0.599618	0.999295	0.987123	0.0637836	-1.19442e-21	-7.86799e-32	0.306836
FC-MZUSP	Oligoplites palometa	26153	875.311	182.48	0.42895	2.33127	0.826972	0.0209058	0.0847454	0.75898	0.99718	0.993352	0.0215548	6.21236e-22	2.49297e-31	0.316272
FC-MZUSP	Oligoplites palometa	29421	952.08	193.546	0.407868	2.45177	0.813072	0.0185837	0.0645991	0.732605	1	0.992903	0.0267967	1.49109e-22	2.78768e-32	0.305158
FC-MZUSP	Oligoplites saliens	31314	973.688	199.675	0.415058	2.4093	0.965528	0.0174602	0.0320516	0.433239	1	0.971553	0.147346	1.68212e-19	4.18954e-29	0.372169
FC-MZUSP	Oligoplites saliens	31955	1036.85	201.709	0.373523	2.67721	0.814929	0.01711	0.0516484	0.694687	0.988699	0.990653	0.0376457	1.38597e-18	-5.43406e-28	0.306814
FC-MZUSP	Oligoplites saliens	33335	1184.87	206.018	0.298377	3.35146	0.738415	0.0164017	0.0487062	0.708859	0.954434	0.988418	0.0552691	-2.12242e-21	4.58007e-32	0.310863
FC-MZUSP	Oligoplites saliens	33908	1300.92	207.781	0.251776	3.97179	0.616924	0.0161245	0.0462709	0.698733	0.988699	0.989348	0.037882	-2.39656e-20	-8.81218e-31	0.406879
FC-MZUSP	Oligoplites saliens	57912	1632.44	271.543	0.27309	3.6618	0.783261	0.00944105	0.0132211	0.577601	0.993651	0.976041	0.15349	1.7111e-20	8.39135e-31	0.212281
FC-MZUSP	Oligoplites saliens	1262	154.184	40.0853	0.667102	1.49902	0.96705	0.433241	25.5154	0.543056	0.877437	0.982019	0.103828	1.69623e-21	5.18327e-33	0.228499
FC-MZUSP	Oligoplites saliens	51345	1440.95	255.684	0.31075	3.21802	0.725366	0.0106486	0.015598	0.548605	0.954434	0.980962	0.102998	4.4083e-21	1.22502e-32	0.231362
FC-MZUSP	Oligoplites saliens	55799	1502.68	266.544	0.31053	3.2203	0.764475	0.00979856	0.0121436	0.51643	0.974489	0.982702	0.0808126	2.92664e-21	5.8959e-31	0.218709
FC-MZUSP	Oligoplites saliens	77654	2569.07	314.439	0.14785	6.76362	0.742852	0.00704085	0.00653143	0.525121	0.928362	0.969939	0.214646	-9.17442e-18	7.03506e-26	0.227671
FC-MZUSP	Oligoplites saliens	1617	159.882	45.3743	0.794913	1.258	0.948387	0.338126	16.142	0.56921	0.965202	0.983061	0.105969	-3.05654e-20	2.74224e-31	0.180444
FC-MZUSP	Oligoplites saliens	6355	327.539	89.9524	0.744388	1.34339	0.988336	0.0860346	1.05156	0.562543	0.993651	0.979393	0.14489	-9.50212e-19	8.18427e-30	0.189747
FC-MZUSP	Oligoplites saliens	13023	481.966	128.769	0.704513	1.41942	0.994958	0.0419834	0.237919	0.551083	0.988699	0.986033	0.0570307	-1.81504e-19	-6.63319e-30	0.195724
FC-MZUSP	Oligoplites saliens	20150	1099.15	160.174	0.20959	4.77123	0.780312	0.027134	0.0881729	0.482684	0.999295	0.979356	0.111061	2.75426e-22	2.66521e-30	0.427575
FC-MZUSP	Oligoplites saliens	31666	1005.96	200.794	0.393223	2.54308	0.838901	0.0172662	0.0459919	0.608199	1	0.985217	0.0739667	5.36818e-20	2.63977e-28	0.309539
FC-MZUSP	Oligoplites saliens	40355	1296.13	226.675	0.301864	3.31275	0.629956	0.0135485	0.0246996	0.543431	0.999295	0.980111	0.124531	3.36355e-20	9.02876e-29	0.334056
FC-MZUSP	Oligoplites saliens	47320	1527.59	245.458	0.254824	3.92428	0.711301	0.0115543	0.0193234	0.574811	0.993651	0.98315	0.0927072	-1.27717e-18	4.19359e-29	0.242537
FC-MZUSP	Oligoplites saliens	49505	1514.54	251.061	0.271205	3.68724	0.799086	0.0110443	0.0160072	0.524193	0.99718	0.980614	0.0990662	6.86728e-22	1.18773e-31	0.212618
FC-MZUSP	Oligoplites saliens	61101	2093.68	278.92	0.175161	5.70904	0.753803	0.0089483	0.00857359	0.4392	1	0.973778	0.150168	-2.2732e-19	1.39166e-29	0.21651
FC-MZUSP	Oligoplites saliens	74274	2917.52	307.52	0.109652	9.11973	0.644387	0.00736126	0.00634358	0.475433	0.954434	0.972627	0.182442	-2.54324e-20	3.30748e-32	0.258293
FC-MZUSP	Oligoplites saliens	1003	117.841	35.736	0.907655	1.10174	0.974733	0.545115	41.1745	0.544686	0.988699	0.978425	0.111047	5.99995e-19	8.12959e-29	0.165086
FC-MZUSP	Oligoplites saliens	6554	437.421	91.3499	0.430444	2.32318	0.783315	0.0834223	0.97797	0.559478	0.912999	0.980098	0.116575	3.8529e-19	-4.03055e-28	0.265027
FC-MZUSP	Oligoplites saurus	8658	902.042	104.994	0.133713	7.47869	0.969541	0.0631497	0.532783	0.533713	0.928362	0.983978	0.0755421	4.3877e-19	4.64517e-27	1.74997
FC-MZUSP	Oligoplites saurus	27827	1253.41	188.23	0.222582	4.49274	0.735872	0.0196482	0.0420452	0.433944	0.993651	0.962516	0.286822	3.70513e-19	1.15584e-28	0.524295
FC-MZUSP	Oligoplites saurus	31774	1352.32	201.137	0.218334	4.58014	0.825042	0.0172075	0.0278403	0.396386	1	0.961046	0.313225	8.54209e-21	6.16979e-30	0.467058
FC-MZUSP	Oligoplites saurus	57521	2051.79	270.625	0.1717	5.82413	0.598211	0.00950522	0.0119321	0.530676	0.988699	0.98187	0.0848873	-1.13894e-17	-5.53413e-28	0.28419
FC-MZUSP	Oligoplites saurus	85365	2985.35	329.682	0.120364	8.3081	0.739008	0.00640485	0.00441888	0.437164	0.982317	0.971789	0.163279	1.09039e-20	1.39311e-29	0.21027
FC-MZUSP	Oligoplites saurus	20675	757.262	162.247	0.453068	2.20718	0.922127	0.026445	0.0616493	0.36485	0.999295	0.955488	0.244694	3.51733e-22	7.83973e-28	0.288913
FC-MZUSP	Oligoplites saurus	26634	1134.6	184.151	0.259992	3.84627	0.830781	0.0205283	0.045107	0.43038	1	0.968867	0.197015	2.31966e-20	1.85021e-30	0.578482
FC-MZUSP	Oligoplites saurus	27967	1064.42	188.703	0.310194	3.22379	0.909762	0.0195498	0.0471111	0.483845	0.993651	0.968556	0.243799	2.84878e-20	7.16043e-29	0.467736
FC-MZUSP	Oligoplites saurus	52305	1324.25	258.064	0.374813	2.66799	0.816411	0.0104531	0.0112888	0.423231	0.965202	0.971008	0.219931	1.37826e-19	3.63664e-29	0.215788
FC-MZUSP	Oligoplites saurus	54959	1624.48	264.53	0.26171	3.82102	0.807959	0.00994833	0.0109007	0.443765	0.988699	0.971408	0.173398	4.31806e-20	1.97228e-29	0.229564
FC-MZUSP	Oligoplites saurus	64213	1754.04	285.934	0.262274	3.8128	0.840154	0.00851463	0.00640777	0.362032	0.999295	0.958535	0.280707	5.91114e-21	3.67601e-30	0.206102
FC-MZUSP	Oligoplites saurus	84961	2546.04	328.901	0.164703	6.07155	0.776502	0.00643531	0.00403405	0.401175	0.99718	0.96999	0.208595	-7.05567e-20	1.68304e-29	0.21752
FC-MZUSP	Oligoplites saurus	30600	1026.14	197.386	0.36519	2.7383	0.812382	0.0178676	0.0590535	0.72683	0.999295	0.991917	0.0336713	-2.10504e-22	4.67338e-32	0.390617
FC-MZUSP	Oligoplites saurus	3516	246.569	66.9082	0.726747	1.37599	0.930159	0.155503	3.27312	0.530547	0.954434	0.975259	0.155581	2.75027e-21	4.77079e-29	0.180812
FC-MZUSP	Oligoplites saurus	64075	2081.33	285.627	0.185873	5.38003	0.656836	0.00853297	0.00951423	0.520776	0.988699	0.975052	0.153068	-1.09186e-18	-2.31453e-29	0.242343
FC-MZUSP	Parona signata	65178	2372.01	288.075	0.145572	6.86944	0.66935	0.00838857	0.00962428	0.542438	0.982317	0.977573	0.141274	7.42691e-21	5.56627e-31	0.278725
FC-MZUSP	Parona signata	66533	2018.4	291.054	0.205225	4.87269	0.66543	0.00821773	0.00844688	0.502019	0.965202	0.97626	0.140386	-1.02306e-18	-3.02155e-29	0.236883
FC-MZUSP	Parona signata	82293	2395.04	323.695	0.18028	5.54692	0.767229	0.00664394	0.00485155	0.445073	0.974489	0.969025	0.204656	-1.12694e-19	2.00031e-30	0.224701
FC-MZUSP	Parona signata	83325	2281.46	325.719	0.201169	4.97095	0.723785	0.00656166	0.00446528	0.412628	0.811278	0.964647	0.296038	-9.11023e-20	2.10439e-31	0.223771
FC-MZUSP	Parona signata	86117	2230	331.131	0.217615	4.59527	0.744821	0.00634892	0.00418335	0.424021	0.982317	0.966687	0.237189	-1.51954e-20	8.01906e-31	0.21619
FC-MZUSP	Parona signata	2723	218.468	58.8815	0.716938	1.39482	0.98588	0.20079	6.01189	0.58069	1	0.976425	0.155445	2.7645e-20	8.81681e-30	0.207804
FC-MZUSP	Parona signata	3379	235.924	65.5917	0.762877	1.31083	0.977437	0.161808	3.39334	0.522964	0.988699	0.982582	0.107588	-2.37403e-21	3.95285e-31	0.185127
FC-MZUSP	Parona signata	49793	1415.1	251.79	0.312467	3.20034	0.735603	0.0109805	0.0163416	0.548009	0.988699	0.985682	0.0820658	1.69746e-19	1.71211e-29	0.213835
FC-MZUSP	Parona signata	53164	1674.01	260.174	0.238402	4.19459	0.607165	0.0102842	0.0146585	0.551792	0.999295	0.980936	0.0986795	3.70576e-19	4.38741e-29	0.33141
FC-MZUSP	Parona signata	55706	1470.45	266.321	0.323749	3.08881	0.745281	0.00981492	0.0124443	0.51534	0.954434	0.981497	0.0973977	6.34472e-22	5.32625e-32	0.199008
FC-MZUSP	Parona signata	59800	1570.52	275.934	0.304666	3.28229	0.67253	0.00914298	0.01038	0.502173	0.993651	0.977206	0.124925	1.20282e-20	2.67686e-32	0.231206
FC-MZUSP	Parona signata	1086	137.012	37.1852	0.726978	1.37556	0.986376	0.503453	47.4017	0.733099	0.982317	0.989571	0.0459382	8.90177e-21	7.6212e-29	0.221443
FC-MZUSP	Parona signata	29250	1039.31	192.983	0.340287	2.9387	0.746364	0.0186923	0.0675234	0.75722	0.928362	0.990986	0.0427659	3.40778e-20	-1.7792e-30	0.378007
FC-MZUSP	Parona signata	30343	936.108	196.555	0.435128	2.29818	0.980863	0.018019	0.0364358	0.461992	0.965202	0.970034	0.250501	-8.63112e-19	-1.49923e-28	0.343335
FC-MZUSP	Parona signata	30525	1069.49	197.144	0.335358	2.98189	0.772667	0.0179115	0.0608896	0.744596	0.99718	0.991178	0.0356764	-1.71878e-21	-2.6488e-31	0.360596
FC-MZUSP	Parona signata	34288	1189.64	208.942	0.304455	3.28456	0.617969	0.0159458	0.0437933	0.677742	0.988699	0.987078	0.0595299	-1.94039e-18	-1.37289e-28	0.383279
FC-MZUSP	Parona signata	63688	2404.55	284.763	0.138421	7.22435	0.704155	0.00858482	0.0077987	0.432627	0.993651	0.963855	0.283378	1.55571e-19	3.18273e-28	0.287162
FC-MZUSP	Parona signata	63704	2280.26	284.799	0.15396	6.4952	0.732003	0.00858266	0.00762365	0.438245	0.993651	0.970963	0.220754	-2.91832e-19	-3.93317e-29	0.265277
FC-MZUSP	Pseudocaranx dentex	47080	1175.63	244.835	0.428063	2.33611	0.815252	0.0116132	0.019412	0.574436	0.999295	0.984143	0.0658245	1.06341e-24	7.89116e-34	0.196361
FC-MZUSP	Pseudocaranx dentex	48534	1160.76	248.587	0.452662	2.20916	0.826913	0.0112653	0.017771	0.560123	0.993651	0.985724	0.0754204	8.93311e-23	3.49202e-33	0.204728
FC-MZUSP	Pseudocaranx dentex	50982	1262.05	254.779	0.402227	2.48616	0.79059	0.0107244	0.0157733	0.55093	0.993651	0.986062	0.0717539	1.26036e-22	5.15467e-33	0.20621
FC-MZUSP	Pseudocaranx dentex	1393	151.74	42.1144	0.760257	1.31535	0.957388	0.392498	18.9832	0.496387	0.999295	0.981621	0.11071	-7.46759e-21	-2.53366e-32	0.17872
FC-MZUSP	Pseudocaranx dentex	1433	158.912	42.7148	0.71309	1.40235	0.973505	0.381542	20.9452	0.580566	0.99718	0.985346	0.0520251	9.52929e-21	4.65586e-30	0.206294
FC-MZUSP	Pseudocaranx dentex	6256	488.333	89.249	0.329666	3.03337	0.721569	0.0873961	1.19695	0.618405	0.993651	0.983956	0.103764	8.89609e-21	5.35722e-32	0.218568
FC-MZUSP	Pseudocaranx dentex	34878	1177.3	210.732	0.316218	3.16237	0.752638	0.0156761	0.0434951	0.695421	0.993651	0.990772	0.0441408	1.17795e-22	2.33923e-33	0.254184
FC-MZUSP	Pseudocaranx dentex	37435	1160.15	218.32	0.349512	2.86113	0.851105	0.0146053	0.0350028	0.65052	0.99718	0.988387	0.0590645	-8.16783e-22	-1.24046e-30	0.221711
FC-MZUSP	Pseudocaranx dentex	40235	1327.87	226.338	0.28675	3.48736	0.766206	0.0135889	0.0312542	0.664861	0.965202	0.986652	0.0626593	2.80178e-21	-4.80953e-32	0.214282
FC-MZUSP	Pseudocaranx dentex	40899	1337.38	228.198	0.287349	3.48008	0.777976	0.0133683	0.0290827	0.645415	0.965202	0.989646	0.0514165	7.05352e-23	3.73991e-35	0.243131
FC-MZUSP	Pseudocaranx dentex	44823	1270.83	238.894	0.348766	2.86725	0.835798	0.012198	0.0225986	0.60082	0.999295	0.98678	0.0456303	-7.70469e-23	1.8813e-34	0.242022
FC-MZUSP	Pseudocaranx dentex	45775	1680.86	241.418	0.203598	4.91165	0.7088	0.0119443	0.0210741	0.59144	0.942163	0.983149	0.0934161	-2.31678e-21	-9.2819e-31	0.227472
FC-MZUSP	Selar crumenophthalmus	46260	1723.83	242.693	0.195625	5.11182	0.652312	0.0118191	0.0222406	0.627228	0.982317	0.984727	0.067715	3.10768e-22	-1.02732e-30	0.265085
FC-MZUSP	Selar crumenophthalmus	53855	2162.53	261.859	0.144715	6.91015	0.698074	0.0101523	0.0164272	0.627885	0.993651	0.984456	0.113524	-6.90034e-21	-1.07332e-32	0.226107
FC-MZUSP	Selar crumenophthalmus	56094	1900.26	267.247	0.195209	5.12272	0.632059	0.00974703	0.0132725	0.560324	0.954434	0.981483	0.12234	-1.31574e-19	2.98404e-31	0.268236
FC-MZUSP	Selar crumenophthalmus	61751	1869.15	280.399	0.222109	4.50229	0.696398	0.00885411	0.00955407	0.490692	0.999295	0.983808	0.0917619	-3.16528e-21	1.21306e-31	0.249458
FC-MZUSP	Selar crumenophthalmus	17166	1182.15	147.839	0.15436	6.47837	0.546775	0.0318508	0.144581	0.563717	0.912999	0.983805	0.0760792	1.9622e-19	6.79335e-28	0.943362
FC-MZUSP	Selar crumenophthalmus	31977	1157.35	201.778	0.3	3.33333	0.836131	0.0170982	0.0328832	0.456506	0.988699	0.976426	0.123049	-7.80142e-19	1.94728e-26	0.545824
FC-MZUSP	Selar crumenophthalmus	33880	1085.58	207.695	0.36127	2.76802	0.82411	0.0161378	0.0459594	0.694681	0.988699	0.98977	0.0586635	2.02438e-20	2.61197e-29	0.364653
FC-MZUSP	Selar crumenophthalmus	34580	1213.81	209.83	0.294938	3.39054	0.87123	0.0158112	0.021671	0.378144	0.928362	0.962958	0.283106	4.97174e-21	3.93453e-30	0.501645
FC-MZUSP	Selar crumenophthalmus	41157	1236.25	228.916	0.33841	2.955	0.730628	0.0132845	0.0279452	0.62915	0.999295	0.989006	0.0539013	-4.94876e-21	-1.33006e-31	0.347113
FC-MZUSP	Selar crumenophthalmus	7816	484.534	99.7579	0.418356	2.39031	0.858429	0.0699527	0.68035	0.555161	0.954434	0.982107	0.116403	1.32726e-21	-1.9968e-31	0.196576
FC-MZUSP	Selar crumenophthalmus	39140	1361.33	223.237	0.265404	3.76784	0.673307	0.0139691	0.0289507	0.587204	0.928362	0.980459	0.122791	-2.65158e-19	9.45728e-30	0.29987
FC-MZUSP	Selar crumenophthalmus	41730	1231.38	230.504	0.345837	2.89154	0.748507	0.0131021	0.0266993	0.616554	0.974489	0.986281	0.0900433	1.3111e-20	-4.98633e-32	0.269894
FC-MZUSP	Selar crumenophthalmus	42493	1283.44	232.602	0.324171	3.08479	0.684267	0.0128668	0.025715	0.619183	0.99718	0.987634	0.0633468	-2.62458e-20	2.46141e-32	0.339396
FC-MZUSP	Selar crumenophthalmus	43664	1232.47	235.785	0.361226	2.76835	0.72811	0.0125218	0.023405	0.595331	0.993651	0.987125	0.0811062	7.31088e-21	-1.00681e-31	0.287718
FC-MZUSP	Selar crumenophthalmus	44678	1516.96	238.507	0.243981	4.09867	0.576483	0.0122376	0.0223	0.589775	0.982317	0.986115	0.0784638	6.09193e-20	-1.9678e-29	0.350599
FC-MZUSP	Selar crumenophthalmus	46373	1272.23	242.99	0.360034	2.77751	0.740593	0.0117903	0.0201067	0.58222	0.999295	0.986406	0.0808484	-1.88815e-20	7.2817e-30	0.269786
FC-MZUSP	Selaroides leptolepis	48306	1618.32	248.002	0.231783	4.31437	0.635012	0.0113185	0.0192198	0.594883	0.999295	0.98599	0.0956146	-5.16104e-20	-5.52091e-31	0.28353
FC-MZUSP	Selaroides leptolepis	56732	1664.7	268.763	0.257255	3.8872	0.687644	0.00963742	0.0117739	0.513209	0.99718	0.983944	0.0803042	2.53833e-20	2.47297e-30	0.267394
FC-MZUSP	Selaroides leptolepis	1922	207.681	49.4688	0.559975	1.78579	0.870077	0.284469	11.0654	0.539465	0.999295	0.96815	0.261694	-3.75655e-20	-1.96787e-30	0.228022
FC-MZUSP	Selaroides leptolepis	24993	1038.52	178.387	0.291207	3.43399	0.905806	0.0218761	0.0494644	0.422082	0.974489	0.961834	0.323365	-1.3001e-20	-7.22418e-30	0.586923
FC-MZUSP	Selaroides leptolepis	32049	1145.97	202.005	0.306673	3.2608	0.93017	0.0170598	0.0427291	0.564583	0.912999	0.96639	0.31329	-3.11158e-21	9.83482e-31	0.388674
FC-MZUSP	Selaroides leptolepis	33639	917.127	206.955	0.502567	1.98978	0.934988	0.0162535	0.0459318	0.687039	0.974489	0.99078	0.0367076	-1.68674e-21	3.85619e-31	0.278859
FC-MZUSP	Selaroides leptolepis	34770	960.198	210.406	0.473907	2.11012	0.933473	0.0157248	0.0421896	0.676592	0.982317	0.992228	0.0307639	-1.47601e-21	-7.15457e-33	0.310524
FC-MZUSP	Selaroides leptolepis	36249	990.423	214.834	0.46437	2.15346	0.896121	0.0150832	0.038073	0.663723	0.982317	0.99125	0.0358626	-2.23355e-23	1.7341e-33	0.300095
FC-MZUSP	Selaroides leptolepis	43579	1223.58	235.556	0.365783	2.73386	0.806421	0.0125462	0.0246347	0.622112	0.988699	0.987543	0.0616568	-3.99129e-20	-1.11446e-31	0.234935
FC-MZUSP	Selaroides leptolepis	65618	2150.91	289.046	0.178234	5.61061	0.83185	0.00833232	0.00780606	0.455245	0.965202	0.968416	0.245367	-7.29832e-20	-2.13183e-29	0.221269
FC-MZUSP	Selaroides leptolepis	7785	1179.7	99.5599	0.0702953	14.2257	0.202465	0.0702312	0.802423	0.644293	0.993651	0.989924	0.0413552	2.27729e-20	-1.37368e-29	2.86812
FC-MZUSP	Selaroides leptolepis	26590	846.5	183.998	0.46631	2.1445	0.89977	0.0205622	0.0811992	0.754368	0.974489	0.994284	0.0204807	8.3099e-23	6.72536e-32	0.302577
FC-MZUSP	Selaroides leptolepis	28177	878.943	189.41	0.458335	2.18181	0.91114	0.0194041	0.0603719	0.61837	0.974489	0.974533	0.254411	4.28883e-20	3.6962e-29	0.319389
FC-MZUSP	Selene setepannis	28958	875.612	192.017	0.47463	2.10691	0.902287	0.0188808	0.0660036	0.727394	0.974489	0.991725	0.03201	8.93156e-24	1.06313e-32	0.302834
FC-MZUSP	Selene setepannis	31458	930.541	200.134	0.45653	2.19043	0.903446	0.0173803	0.0539546	0.702667	0.993651	0.989445	0.0328693	-3.44914e-22	-3.78572e-32	0.309108
FC-MZUSP	Selene setepannis	32992	935.11	204.955	0.474126	2.10915	0.901864	0.0165722	0.0478274	0.685885	0.99718	0.990532	0.0445991	-5.33568e-22	2.63108e-33	0.280644
FC-MZUSP	Selene setepannis	33240	947.754	205.724	0.465028	2.15041	0.900325	0.0164486	0.0472886	0.68976	0.965202	0.991452	0.0333419	2.42674e-22	7.46915e-31	0.300321
FC-MZUSP	Selene setepannis	33450	961.169	206.373	0.454995	2.19783	0.895055	0.0163453	0.0430564	0.626545	0.974489	0.978247	0.183495	-3.57414e-20	2.259e-31	0.298494
FC-MZUSP	Selene setepannis	33806	959.713	207.468	0.461234	2.1681	0.919491	0.0161732	0.044302	0.665276	0.928362	0.986394	0.0904586	2.49332e-20	1.693e-30	0.320009
FC-MZUSP	Selene setepannis	34025	937.612	208.139	0.486364	2.05607	0.919893	0.0160691	0.0440726	0.673237	0.965202	0.989885	0.049082	-1.23285e-21	3.04361e-31	0.295776
FC-MZUSP	Selene setepannis	34622	1339.05	209.957	0.242643	4.12128	0.637359	0.015792	0.0324083	0.50828	0.974489	0.968232	0.216658	-8.01985e-20	1.30247e-29	0.287408
FC-MZUSP	Selene setepannis	35420	1039.7	212.363	0.411762	2.42859	0.86325	0.0154362	0.0408748	0.677144	0.993651	0.992413	0.0356048	-4.58185e-23	7.13668e-34	0.318271
FC-MZUSP	Selene setepannis	36032	1029.7	214.19	0.427052	2.34164	0.844118	0.015174	0.0388779	0.666559	0.912999	0.991876	0.0355475	-1.30175e-23	9.45773e-33	0.347851
FC-MZUSP	Selene setepannis	42375	1058.15	232.279	0.475585	2.10267	0.897642	0.0129027	0.0261526	0.620127	1	0.984736	0.0667984	-2.38334e-20	-1.24989e-31	0.224835
FC-MZUSP	Selene setepannis	42988	1007.96	233.953	0.531702	1.88075	0.911729	0.0127187	0.0244697	0.600995	1	0.985823	0.0742173	2.45137e-21	5.20158e-32	0.232373
FC-MZUSP	Selene setepannis	48655	1510.09	248.897	0.26812	3.72967	0.710624	0.0112373	0.0193629	0.605769	0.835116	0.979046	0.111512	-1.03098e-19	-7.62707e-31	0.241178
FC-MZUSP	Selene setepannis	59532	1886.44	275.315	0.210221	4.75691	0.68437	0.00918414	0.0109283	0.519443	0.942163	0.980315	0.150024	-8.07506e-19	3.12626e-29	0.279897
FC-MZUSP	Selene setepannis	72982	2326.3	304.834	0.16947	5.90074	0.703434	0.00749157	0.00715193	0.500396	1	0.966636	0.275006	6.56459e-21	2.52676e-30	0.251907
FC-MZUSP	Selene setepannis	83633	2526.29	326.32	0.164673	6.07264	0.71956	0.00653749	0.00577126	0.507272	0.877437	0.948766	0.446514	1.67159e-18	1.23661e-27	0.233167
FC-MZUSP	Selene setepannis	3000	240.51	61.8039	0.651727	1.53438	0.915471	0.18225	4.63679	0.554256	0.99718	0.982189	0.108447	-1.57502e-20	9.49507e-32	0.219874
FC-MZUSP	Selene setepannis	30903	857.529	198.361	0.528096	1.8936	0.933259	0.0176925	0.0544439	0.684218	0.999295	0.988537	0.043883	1.49952e-19	2.47603e-30	0.269929
FC-MZUSP	Selene setepannis	41200	1146.55	229.036	0.393842	2.53909	0.847092	0.0132706	0.0291381	0.652055	0.988699	0.985454	0.0748618	-7.49268e-21	-4.97342e-32	0.197741
FC-MZUSP	Selene spixii	42893	1362.82	233.694	0.290217	3.4457	0.650791	0.0127468	0.0260767	0.630699	0.993651	0.985304	0.0788147	-8.29571e-19	4.79223e-31	0.33267
FC-MZUSP	Selene spixii	42957	1070.99	233.869	0.470621	2.12485	0.888441	0.0127278	0.0252788	0.618604	1	0.982661	0.0645499	-3.10735e-21	7.27225e-31	0.211694
FC-MZUSP	Selene spixii	43467	1224.31	235.253	0.36441	2.74416	0.849512	0.0125785	0.0251231	0.626667	0.988699	0.984061	0.0743176	-4.49191e-21	2.81414e-32	0.238796
FC-MZUSP	Selene spixii	44758	1273.32	238.721	0.346902	2.88266	0.790638	0.0122157	0.0229741	0.608441	1	0.985725	0.0662685	-1.03992e-19	-1.72889e-30	0.216053
FC-MZUSP	Selene spixii	45465	1371.38	240.599	0.30379	3.29175	0.739846	0.0120257	0.0223918	0.612661	0.965202	0.986079	0.0670491	-9.44555e-20	-2.72502e-31	0.270427
FC-MZUSP	Selene spixii	45709	1140	241.244	0.441976	2.26257	0.829836	0.0119615	0.0215783	0.596938	0.993651	0.984725	0.0751626	-1.25501e-19	-3.41694e-31	0.220231
FC-MZUSP	Selene spixii	48253	1353.3	247.866	0.33109	3.02033	0.864687	0.0113309	0.0193919	0.598156	0.982317	0.984567	0.086477	-4.00836e-21	7.67441e-31	0.205063
FC-MZUSP	Selene spixii	49314	1385.83	250.576	0.322672	3.09912	0.77759	0.0110871	0.0180815	0.583536	0.999295	0.983526	0.0893988	-3.01936e-20	-7.45568e-31	0.210901
FC-MZUSP	Selene spixii	51038	1511.59	254.919	0.280695	3.56259	0.834391	0.0107126	0.0171408	0.588291	0.999295	0.979972	0.105884	4.35279e-22	1.96986e-32	0.205768
FC-MZUSP	Selene spixii	51326	1335.69	255.637	0.361525	2.76606	0.771228	0.0106525	0.0157202	0.552715	0.974489	0.98133	0.0869855	-5.1799e-20	-8.33404e-31	0.231777
FC-MZUSP	Selene spixii	33469	932.624	206.432	0.483547	2.06805	0.896379	0.016336	0.0465816	0.688432	0.928362	0.990721	0.0454298	2.90408e-22	2.30064e-31	0.298475
FC-MZUSP	Selene vomer	34830	1008.77	210.587	0.430112	2.32497	0.882867	0.0156977	0.0417583	0.668673	0.993651	0.987149	0.078385	-3.75635e-20	-2.54797e-30	0.305514
FC-MZUSP	Selene vomer	35073	905.997	211.32	0.536944	1.86239	0.919827	0.0155889	0.0408032	0.662336	0.99718	0.988836	0.0426656	-5.27136e-22	9.89138e-33	0.252123
FC-MZUSP	Selene vomer	35745	942.098	213.335	0.506097	1.97591	0.93637	0.0152958	0.0387079	0.652112	0.982317	0.989085	0.0594512	-1.68721e-21	8.99151e-31	0.275668
FC-MZUSP	Selene vomer	36714	978.708	216.208	0.481654	2.07618	0.894264	0.0148921	0.0366673	0.651844	0.988699	0.987692	0.0628742	6.08803e-21	2.6486e-30	0.266884
FC-MZUSP	Selene vomer	39718	961.955	224.879	0.539371	1.85401	0.947946	0.0137658	0.0306098	0.636648	0.993651	0.98479	0.0786858	3.27505e-24	3.91373e-33	0.262943
FC-MZUSP	Selene vomer	39753	1213.86	224.978	0.339032	2.94957	0.877685	0.0137537	0.0329796	0.683548	0.999295	0.985683	0.0885538	4.69363e-21	-7.3652e-32	0.276168
FC-MZUSP	Selene vomer	44087	1255.32	236.925	0.351571	2.84438	0.714978	0.0124016	0.0234749	0.599469	0.999295	0.982009	0.0845364	2.75819e-19	1.17658e-30	0.298719
FC-MZUSP	Selene vomer	44306	1208.12	237.512	0.381462	2.6215	0.764661	0.0123403	0.0234312	0.610582	0.993651	0.983513	0.085231	-6.54798e-20	4.96457e-30	0.291256
FC-MZUSP	Selene vomer	46293	1516.14	242.78	0.253075	3.9514	0.691332	0.0118106	0.0232666	0.65471	0.999295	0.980062	0.171715	-3.11211e-20	6.54579e-30	0.279632
FC-MZUSP	Selene vomer	55355	2080.72	265.481	0.160671	6.22388	0.613889	0.00987716	0.0142202	0.575458	0.982317	0.980158	0.166173	4.17123e-19	1.15143e-27	0.390907
FC-MZUSP	Selene vomer	1508	274.426	43.8183	0.251628	3.97412	0.91616	0.362566	22.2868	0.673932	0.99718	0.989661	0.0446851	-3.44838e-21	1.25473e-29	0.83256
FC-MZUSP	Selene vomer	4932	293.054	79.244	0.721669	1.38568	0.985021	0.110858	2.08261	0.669418	0.993651	0.987837	0.0529847	4.03366e-20	5.46012e-30	0.20907
FC-MZUSP	Selene vomer	32370	999.311	203.014	0.407335	2.45498	0.839514	0.0168906	0.0402462	0.55001	0.965202	0.972649	0.221993	-1.0495e-19	2.07672e-28	0.291919
FC-MZUSP	Selene vomer	33767	1192.53	207.349	0.298375	3.35148	0.790167	0.0161918	0.0475794	0.711257	0.988699	0.990729	0.0437255	-2.48963e-20	4.94745e-32	0.258254
FC-MZUSP	Selene vomer	39465	1143.82	224.162	0.379059	2.63811	0.815983	0.013854	0.0338596	0.687048	0.912999	0.982608	0.121237	-1.48946e-19	-2.28849e-30	0.242054
FC-MZUSP	Selene vomer	39930	1357.95	225.478	0.27211	3.67498	0.764869	0.0136927	0.0313003	0.655839	0.965202	0.986083	0.068159	-3.94303e-21	-6.48101e-32	0.28184
FC-MZUSP	Selene vomer	45267	1764.45	240.074	0.182715	5.47301	0.526661	0.0120783	0.0224396	0.611438	0.974489	0.984046	0.0849088	-1.04319e-17	-4.82411e-27	0.395253
FC-CRBMUV	Achirus klunzingeri	25912	776.683	181.638	0.539788	1.85258	0.910855	0.0211003	0.085434	0.751969	0.942163	0.991781	0.0237891	-9.2653e-21	-7.04591e-32	0.270243
FC-CRBMUV	Achirus klunzingeri	32537	1040.93	203.537	0.377353	2.65004	0.863692	0.0168039	0.052741	0.730911	0.974489	0.990576	0.0553694	6.76098e-22	5.72704e-31	0.382261
FC-CRBMUV	Achirus klunzingeri	33462	931.612	206.41	0.484497	2.06399	0.890326	0.0163394	0.0465578	0.692055	0.99718	0.989119	0.0590072	-1.53154e-22	-1.69731e-33	0.28914
FC-CRBMUV	Achirus klunzingeri	34260	996.843	208.857	0.433255	2.30811	0.884746	0.0159588	0.0438071	0.67922	0.974489	0.991763	0.0233093	-5.72359e-22	1.63591e-32	0.353677
FC-CRBMUV	Achirus klunzingeri	34794	924.156	210.478	0.511945	1.95334	0.915078	0.0157139	0.0417152	0.665633	0.982317	0.989998	0.0329409	-9.58334e-23	-1.82409e-35	0.27403
FC-CRBMUV	Achirus klunzingeri	36441	1133.78	215.402	0.356241	2.80709	0.86206	0.0150037	0.0417982	0.740161	0.993651	0.986642	0.117642	7.33943e-21	1.53411e-29	0.290374
FC-CRBMUV	Achirus klunzingeri	36927	1182.89	216.834	0.331638	3.01534	0.834376	0.0148062	0.0406786	0.722639	0.988699	0.985729	0.126722	2.03922e-20	7.66099e-29	0.36325
FC-CRBMUV	Achirus klunzingeri	37319	958.784	217.982	0.510151	1.96021	0.934096	0.0146507	0.034912	0.644238	0.954434	0.988641	0.0320959	-4.41279e-22	-5.21712e-33	0.278446
FC-CRBMUV	Achirus klunzingeri	40467	1070.62	226.989	0.443646	2.25405	0.888506	0.013511	0.0288611	0.627793	0.993651	0.988655	0.0377531	-1.13399e-23	-2.28947e-34	0.330169
FC-CRBMUV	Achirus klunzingeri	41523	1260.49	229.932	0.328413	3.04495	0.679902	0.0131674	0.0305877	0.688599	0.965202	0.984048	0.0907594	-9.5508e-18	-1.00568e-26	0.349992
FC-CRBMUV	Achirus klunzingeri	42119	1684.35	231.576	0.186561	5.36018	0.675179	0.0129811	0.0293966	0.685623	0.99718	0.984913	0.1237	-9.8612e-19	-5.50228e-28	0.248216
FC-CRBMUV	Achirus klunzingeri	42869	1272.99	233.629	0.332431	3.00814	0.730954	0.012754	0.0251112	0.614446	0.993651	0.987102	0.0474492	-2.52817e-20	3.27812e-30	0.234645
FC-CRBMUV	Achirus klunzingeri	43045	1241.13	234.108	0.351152	2.84777	0.7025	0.0127018	0.0248007	0.611205	0.965202	0.986231	0.0413337	-9.92943e-19	-1.37943e-28	0.334122
FC-CRBMUV	Achirus klunzingeri	44368	1260.77	237.679	0.350756	2.85098	0.707838	0.0123231	0.0246163	0.635711	0.999295	0.98316	0.096345	6.51486e-20	5.53371e-31	0.317775
FC-CRBMUV	Achirus mazatlanus	45819	1143.58	241.534	0.440275	2.27131	0.762379	0.0119328	0.0214046	0.593503	0.99718	0.982865	0.0774255	3.44673e-20	1.29292e-31	0.300634
FC-CRBMUV	Achirus mazatlanus	50268	1544.2	252.989	0.264909	3.77488	0.754492	0.0108767	0.0176017	0.586662	0.999295	0.981314	0.148828	2.7141e-20	3.80354e-30	0.253537
FC-CRBMUV	Achirus mazatlanus	51045	1395.67	254.936	0.329305	3.0367	0.793437	0.0107111	0.015495	0.54291	0.999295	0.982901	0.075628	6.16531e-21	2.01065e-30	0.246809
FC-CRBMUV	Achirus mazatlanus	1532	190.225	44.1656	0.532024	1.87961	0.929048	0.356886	24.837	0.767899	0.99718	0.98896	0.0784638	-1.28161e-17	-4.60035e-25	0.266759
FC-CRBMUV	Achirus mazatlanus	3736	249.782	68.9697	0.752481	1.32894	0.966374	0.146346	3.12831	0.583423	0.988699	0.98594	0.0523832	-9.06743e-19	-9.85903e-29	0.182913
FC-CRBMUV	Achirus mazatlanus	4468	287.924	75.4244	0.677279	1.4765	0.954089	0.12237	2.49828	0.663095	0.99718	0.983915	0.114119	-1.68822e-17	-1.75391e-26	0.186689
FC-CRBMUV	Achirus mazatlanus	31997	1293.8	201.841	0.240205	4.1631	0.734651	0.0170875	0.057123	0.763196	0.982317	0.989852	0.0727708	8.40425e-20	6.5652e-28	0.439182
FC-CRBMUV	Achirus mazatlanus	33118	1388.31	205.346	0.215925	4.63123	0.766248	0.0165091	0.0513952	0.735821	0.982317	0.988798	0.0681805	-5.08551e-20	2.72657e-28	0.401666
FC-CRBMUV	Achirus mazatlanus	36296	985.754	214.973	0.469387	2.13044	0.910953	0.0150636	0.0378714	0.660873	0.993651	0.99063	0.0300049	9.89735e-22	9.43636e-32	0.311225
FC-CRBMUV	Achirus mazatlanus	37909	1132.45	219.698	0.371463	2.69206	0.731058	0.0144227	0.0389962	0.731465	0.993651	0.986508	0.119783	-1.39388e-19	1.85441e-26	0.356546
FC-CRBMUV	Achirus mazatlanus	38246	1025.07	220.672	0.457394	2.1863	0.902433	0.0142956	0.033127	0.641863	0.982317	0.989398	0.0403598	-4.51488e-22	1.76571e-30	0.324149
FC-CRBMUV	Achirus mazatlanus	38246	1726.94	220.672	0.161154	6.20524	0.635432	0.0142956	0.0395805	0.756024	0.993651	0.987988	0.0947123	-6.55056e-19	-3.31485e-28	0.359945
FC-CRBMUV	Achirus mazatlanus	38247	1041.55	220.675	0.443041	2.25713	0.907768	0.0142952	0.0330624	0.642105	0.993651	0.990161	0.0315373	7.94478e-22	8.63386e-32	0.316899
FC-CRBMUV	Achirus mazatlanus	38336	1087.68	220.932	0.407207	2.45575	0.867507	0.0142621	0.0333932	0.650866	0.993651	0.989738	0.0367649	7.90064e-23	3.61036e-32	0.321555
FC-CRBMUV	Achirus mazatlanus	39845	1089.03	225.238	0.422189	2.36861	0.891148	0.0137219	0.0300928	0.634138	0.999295	0.988703	0.0400304	1.94432e-22	2.13591e-32	0.332228
FC-CRBMUV	Achirus scutum	41092	1873.02	228.736	0.147191	6.7939	0.701804	0.0133055	0.0324527	0.715259	0.988699	0.986399	0.109106	-2.19141e-18	2.13932e-27	0.355901
FC-CRBMUV	Achirus scutum	46663	1102.16	243.748	0.482715	2.07162	0.9028	0.011717	0.0195863	0.577863	0.99718	0.987266	0.0465183	-1.22634e-22	2.18807e-32	0.262196
FC-CRBMUV	Achirus scutum	34761	1214.87	210.378	0.295968	3.37874	0.763944	0.0157288	0.0431889	0.687447	0.99718	0.99047	0.0306279	-4.70763e-22	-2.30571e-33	0.399414
FC-CRBMUV	Achirus scutum	36220	1116.28	214.748	0.365267	2.73772	0.815582	0.0150953	0.0387391	0.668698	0.99718	0.989513	0.0408754	-5.69611e-22	6.15238e-33	0.381313
FC-CRBMUV	Achirus scutum	66438	2199.2	290.846	0.172623	5.79298	0.794608	0.00822948	0.00855971	0.499247	0.974489	0.975499	0.121573	3.01416e-20	2.53563e-29	0.220456
FC-CRBMUV	Achirus scutum	80836	2505.05	320.817	0.161876	6.17757	0.682126	0.00676369	0.00504311	0.43878	0.954434	0.96676	0.166609	9.05471e-21	2.51622e-29	0.260522
FC-CRBMUV	Achirus scutum	106007	2669.96	367.386	0.186868	5.35137	0.826759	0.00515768	0.00237032	0.355453	0.99718	0.956171	0.39262	-2.12153e-22	7.49865e-31	0.196775
FC-CRBMUV	Achirus scutum	113080	2683.41	379.444	0.197343	5.06731	0.857505	0.00483507	0.00203042	0.342415	1	0.944863	0.436811	5.51669e-22	2.95521e-31	0.192922
FC-CRBMUV	Achirus scutum	30239	1002.77	196.218	0.377901	2.6462	0.863182	0.018081	0.0603516	0.723736	0.954434	0.990099	0.0461459	-1.11005e-19	9.44901e-28	0.386782
FC-CRBMUV	Achirus scutum	32436	955.026	203.221	0.446896	2.23766	0.906337	0.0168563	0.0501096	0.694739	0.942163	0.991427	0.0240469	-3.77211e-21	-2.71753e-32	0.351596
FC-CRBMUV	Achirus scutum	34591	1156.22	209.863	0.325155	3.07546	0.733217	0.0158061	0.0337269	0.536776	0.99718	0.985607	0.0657314	-1.59789e-18	-5.15478e-28	0.396877
FC-CRBMUV	Achirus scutum	36718	1144.08	216.219	0.352514	2.83677	0.78295	0.0148905	0.0300153	0.541824	0.99718	0.988154	0.0440048	-1.84749e-18	-3.17895e-28	0.372449
FC-CRBMUV	Achirus scutum	37560	1269.44	218.684	0.292896	3.41418	0.706759	0.0145567	0.0345816	0.643463	0.988699	0.989043	0.0499842	-8.57188e-18	-1.02331e-27	0.44052
FC-CRBMUV	Achirus scutum	39556	1259.98	224.42	0.313109	3.19378	0.742167	0.0138222	0.0300157	0.621789	0.988699	0.989539	0.0358626	-5.38334e-18	-1.1623e-27	0.410231
FC-CRBMUV	Achirus scutum	1391	199.255	42.0842	0.44027	2.27133	0.881496	0.393063	26.5451	0.677325	0.993651	0.990988	0.0359915	-9.78227e-20	1.4845e-29	0.424574
FC-CRBMUV	Achirus scutum	2561	256.569	57.1031	0.488892	2.04544	0.9801	0.213491	8.15723	0.702573	0.974489	0.986627	0.0715176	-4.18059e-20	2.17672e-30	0.339429
FC-CRBMUV	Alectis ciliaris	2922	283.539	60.9951	0.456735	2.18945	0.979551	0.187115	5.99206	0.674918	0.988699	0.987611	0.0442912	-1.92407e-21	7.11576e-32	0.349896
FC-CRBMUV	Alectis ciliaris	3548	299.74	67.212	0.496254	2.0151	0.876699	0.154101	3.94973	0.657087	0.99718	0.989993	0.0456804	-8.69552e-19	7.89826e-30	0.273184
FC-CRBMUV	Alectis ciliaris	31169	1017.84	199.212	0.378073	2.64499	0.762134	0.0175415	0.0431022	0.557111	1	0.98189	0.0931368	-1.01589e-17	-8.93389e-27	0.420191
FC-CRBMUV	Alectis ciliaris	32873	1047.65	204.585	0.376369	2.65697	0.812261	0.0166322	0.0495295	0.703999	0.999295	0.990357	0.0388058	1.07828e-20	9.50818e-29	0.408629
FC-CRBMUV	Alectis ciliaris	33209	1001.45	205.628	0.416107	2.40323	0.81707	0.0164639	0.038101	0.561381	0.999295	0.983761	0.0718828	-1.14527e-17	-5.73426e-27	0.378895
FC-CRBMUV	Alectis ciliaris	33875	1336.57	207.68	0.238292	4.19654	0.615495	0.0161402	0.0469236	0.714215	0.99718	0.989051	0.0507147	-3.42416e-19	-1.59095e-27	0.479785
FC-CRBMUV	Alectis ciliaris	33955	1054.64	207.925	0.383622	2.60673	0.87158	0.0161022	0.045111	0.685032	0.999295	0.990424	0.0292386	4.46275e-21	3.71225e-29	0.40296
FC-CRBMUV	Alectis ciliaris	34439	1322.67	209.402	0.247377	4.04241	0.60551	0.0158759	0.0450058	0.705658	0.999295	0.988602	0.0513735	-2.41706e-19	-2.51172e-28	0.483849
FC-CRBMUV	Alectis ciliaris	35389	1258.68	212.27	0.280702	3.5625	0.669169	0.0154497	0.0412662	0.681722	1	0.989532	0.0329696	-2.70967e-20	-1.83089e-30	0.448737
FC-CRBMUV	Alectis ciliaris	36508	1273.51	215.6	0.282873	3.53515	0.654476	0.0149762	0.0379678	0.66831	1	0.989221	0.0358268	-6.85489e-20	-5.24408e-30	0.453851
FC-CRBMUV	Alectis ciliaris	2597	210.066	57.5031	0.739555	1.35217	0.978892	0.210531	7.89527	0.695269	0.974489	0.985491	0.0726705	-1.42171e-19	-2.17062e-29	0.205372
FC-CRBMUV	Alectis ciliaris	2688	212.652	58.5019	0.746966	1.33875	0.979235	0.203404	5.09213	0.47189	0.965202	0.959375	0.223561	-7.31578e-20	1.18203e-28	0.201925
FC-CRBMUV	Alectis ciliaris	9699	531.404	111.127	0.431606	2.31693	0.817377	0.0563718	0.555592	0.685144	0.993651	0.984856	0.0631821	4.13001e-19	7.38412e-28	0.321806
FC-CRBMUV	Alectis ciliaris	14921	831.227	137.833	0.271374	3.68495	0.680951	0.036643	0.200393	0.586172	1	0.979139	0.102482	-7.27376e-19	1.21122e-26	0.295745
FC-CRBMUV	Alectis ciliaris	26186	986.014	182.595	0.338464	2.95452	0.874265	0.0208795	0.0525759	0.471877	1	0.963617	0.201534	2.45093e-24	2.46425e-28	0.273451
FC-CRBMUV	Alectis ciliaris	28731	1010	191.263	0.353932	2.8254	0.845054	0.01903	0.0677194	0.73093	0.974489	0.988064	0.0412334	1.26237e-20	5.9623e-31	0.413313
FC-CRBMUV	Alphestes afer	29865	947.754	195.001	0.417812	2.39342	0.873552	0.0183074	0.0613624	0.717917	0.999295	0.9883	0.0399874	4.33066e-20	9.43558e-29	0.343767
FC-CRBMUV	Alphestes afer	31854	1199.37	201.39	0.278271	3.59362	0.818217	0.0171642	0.0286928	0.40051	0.993651	0.956833	0.254354	2.50222e-20	2.81291e-28	0.44901
FC-CRBMUV	Alphestes afer	62894	1941.27	282.983	0.209724	4.76816	0.835224	0.0086932	0.00843063	0.438617	0.974489	0.960406	0.279382	8.57208e-20	2.71416e-28	0.248383
FC-CRBMUV	Alphestes afer	103620	3173.2	363.226	0.129318	7.73287	0.746128	0.00527649	0.00263651	0.38151	0.999295	0.952099	0.256889	-6.24303e-21	3.87201e-30	0.220298
FC-CRBMUV	Alphestes afer	23757	1009.51	173.921	0.29294	3.41367	0.854907	0.0230143	0.0551175	0.434209	0.982317	0.969027	0.192038	-1.40034e-19	-3.13665e-29	0.267646
FC-CRBMUV	Alphestes afer	24416	1037.11	176.316	0.285256	3.50562	0.858872	0.0223931	0.069271	0.527752	0.974489	0.96225	0.235943	-2.84342e-19	4.00324e-28	0.245255
FC-CRBMUV	Alphestes afer	33029	1142.1	205.07	0.318199	3.14269	0.761967	0.0165536	0.0466089	0.670433	0.982317	0.9897	0.0365	-2.63885e-19	-1.28026e-27	0.454052
FC-CRBMUV	Alphestes afer	34733	1277.92	210.294	0.267266	3.74159	0.774547	0.0157415	0.0393259	0.623966	0.99718	0.980653	0.107459	4.24949e-18	5.77516e-27	0.398954
FC-CRBMUV	Alphestes afer	36508	1215.61	215.6	0.310462	3.22101	0.739328	0.0149762	0.0377618	0.665006	0.988699	0.990478	0.0260448	-5.31707e-23	2.9926e-35	0.373577
FC-CRBMUV	Alphestes afer	37993	1114.48	219.941	0.384386	2.60155	0.838179	0.0143908	0.0343142	0.653658	0.999295	0.987689	0.0369081	-3.47243e-21	-3.18365e-31	0.378792
FC-CRBMUV	Alphestes afer	38303	1055.23	220.837	0.432265	2.31339	0.88429	0.0142743	0.0324571	0.629951	0.99718	0.985946	0.0502492	9.75322e-21	1.39007e-29	0.344691
FC-CRBMUV	Alphestes afer	38679	1477.86	221.918	0.222545	4.49348	0.58601	0.0141356	0.0323978	0.636229	0.993651	0.983482	0.063132	-1.71012e-19	-2.77076e-28	0.427857
FC-CRBMUV	Alphestes afer	43726	1462.31	235.953	0.256965	3.89159	0.649583	0.012504	0.0233224	0.596626	0.982317	0.984688	0.0581908	-2.43123e-20	4.67194e-29	0.371473
FC-CRBMUV	Alphestes afer	70683	2373.75	299.994	0.157636	6.34374	0.767993	0.00773524	0.00676293	0.44716	0.993651	0.969046	0.188608	5.82964e-21	6.68199e-29	0.247725
FC-CRBMUV	Alphestes afer	71216	1751.99	301.123	0.291559	3.42984	0.845746	0.00767735	0.00661988	0.441628	0.982317	0.961561	0.276632	-3.25398e-20	8.70445e-29	0.247814
FC-CRBMUV	Alphestes multiguttatus	71330	2676.37	301.364	0.125138	7.99116	0.748753	0.00766508	0.00826011	0.551988	0.993651	0.970178	0.159255	3.00373e-19	2.88947e-28	0.266267
FC-CRBMUV	Alphestes multiguttatus	71507	2368.81	301.738	0.16014	6.24454	0.695736	0.0076461	0.00629208	0.434514	0.974489	0.965278	0.231789	-4.25296e-20	7.94518e-29	0.268613
FC-CRBMUV	Alphestes multiguttatus	77394	2110.07	313.913	0.218436	4.57801	0.816255	0.0070645	0.00463362	0.39466	0.999295	0.956805	0.234761	-2.12364e-21	-1.52196e-30	0.232877
FC-CRBMUV	Alphestes multiguttatus	96292	4226.06	350.147	0.0677529	14.7595	0.687957	0.00567804	0.00316961	0.399162	0.999295	0.967843	0.177938	5.14733e-20	1.3408e-27	0.261054
FC-CRBMUV	Alphestes multiguttatus	2156	251.255	52.3937	0.42917	2.33008	0.973803	0.253595	8.72031	0.529349	0.974489	0.972634	0.145484	1.86118e-19	4.01124e-28	0.414743
FC-CRBMUV	Alphestes multiguttatus	24853	1116.64	177.887	0.250473	3.99245	0.808491	0.0219994	0.0566893	0.475155	0.982317	0.9721	0.174143	1.06793e-20	1.15103e-28	0.435421
FC-CRBMUV	Alphestes multiguttatus	28631	1180.35	190.93	0.258242	3.87234	0.731241	0.0190964	0.0711038	0.756375	1	0.984805	0.0905588	1.41594e-18	9.72296e-26	0.429935
FC-CRBMUV	Alphestes multiguttatus	30242	924.441	196.228	0.444695	2.24873	0.917536	0.0180792	0.0586106	0.704938	0.988699	0.990528	0.0315731	4.77315e-24	1.34492e-34	0.337947
FC-CRBMUV	Alphestes multiguttatus	30905	1261.55	198.367	0.244021	4.09801	0.556877	0.0176913	0.057269	0.718637	0.757878	0.990685	0.0319312	1.2407e-19	1.63804e-27	0.429435
FC-CRBMUV	Alphestes multiguttatus	31260	951.754	199.503	0.43366	2.30596	0.907876	0.0174904	0.0551736	0.710088	0.999295	0.989999	0.0271118	-9.98728e-23	1.29087e-33	0.363507
FC-CRBMUV	Alphestes multiguttatus	32038	965.144	201.97	0.432206	2.31371	0.903268	0.0170657	0.0517075	0.701991	0.928362	0.990751	0.0245696	-1.09149e-20	-5.44763e-31	0.381987
FC-CRBMUV	Alphestes multiguttatus	32092	1067.87	202.141	0.353645	2.82769	0.80423	0.017037	0.0522302	0.70687	0.988699	0.989427	0.0351752	-1.54516e-20	-3.07688e-30	0.391974
FC-CRBMUV	Alphestes multiguttatus	32641	1031.31	203.862	0.385651	2.59302	0.872124	0.0167504	0.0501954	0.703758	1	0.989274	0.0309501	-1.75666e-21	-5.53407e-32	0.372217
FC-CRBMUV	Alphestes multiguttatus	32705	1006.88	204.062	0.405382	2.46681	0.871158	0.0167176	0.05034	0.708236	0.912999	0.990288	0.0338862	-1.92735e-20	-5.81019e-31	0.377656
FC-CRBMUV	Alphestes multiguttatus	32773	1203.52	204.274	0.284328	3.51706	0.755539	0.0166829	0.0513106	0.72209	0.999295	0.987274	0.0626665	-2.15095e-20	2.86539e-28	0.349147
FC-CRBMUV	Alphestes multiguttatus	33086	1061.33	205.247	0.369109	2.70923	0.83208	0.0165251	0.0466107	0.672153	0.954434	0.988181	0.0511085	1.6332e-18	-8.27333e-29	0.394044
FC-CRBMUV	Alphestes multiguttatus	33876	977.772	207.683	0.445274	2.24581	0.934691	0.0161397	0.0451159	0.682116	0.982317	0.990055	0.0272693	-7.60244e-21	-1.09616e-31	0.352246
FC-CRBMUV	Alphestes multiguttatus	34421	1210.18	209.347	0.295347	3.38585	0.73372	0.0158842	0.0399622	0.624492	0.965202	0.986147	0.0581479	8.79527e-19	5.23148e-28	0.39512
FC-CRBMUV	Alutera monoceros	36870	1383.03	216.666	0.242224	4.12841	0.589778	0.0148291	0.0375988	0.67154	0.99718	0.986923	0.0443986	-3.16012e-19	-1.03644e-27	0.423181
FC-CRBMUV	Alutera monoceros	40337	1435.58	226.624	0.245957	4.06574	0.737139	0.0135546	0.0292217	0.629113	0.999295	0.986247	0.0584271	-4.94863e-20	-8.29133e-30	0.366285
FC-CRBMUV	Alutera monoceros	43816	1544.27	236.195	0.230885	4.33116	0.737916	0.0124783	0.0243244	0.597308	0.993651	0.969649	0.183366	2.49804e-19	6.32524e-29	0.266229
FC-CRBMUV	Alutera monoceros	49670	1439.23	251.479	0.301329	3.31863	0.697583	0.0110077	0.0171636	0.563598	0.993651	0.979367	0.0664404	-1.42755e-18	-6.42215e-30	0.331051
FC-CRBMUV	Alutera monoceros	50691	1657.5	254.051	0.231864	4.31288	0.610676	0.0107859	0.0178338	0.599886	0.993651	0.976127	0.133396	-3.92331e-18	-5.49501e-28	0.33849
FC-CRBMUV	Alutera monoceros	56491	2015.57	268.191	0.17474	5.7228	0.726442	0.00967853	0.0165106	0.678151	0.877437	0.977111	0.147876	2.11473e-19	-5.24018e-29	0.242256
FC-CRBMUV	Alutera monoceros	66944	2029.25	291.952	0.204292	4.89496	0.728571	0.00816727	0.00895644	0.526704	0.954434	0.967625	0.226612	-1.33578e-19	3.17309e-29	0.273121
FC-CRBMUV	Alutera monoceros	66955	2098.86	291.976	0.190996	5.23571	0.796476	0.00816593	0.0102514	0.597447	0.954434	0.968142	0.219816	2.66755e-19	9.22729e-27	0.223791
FC-CRBMUV	Alutera monoceros	69511	2772.49	297.496	0.113638	8.7999	0.550225	0.00786566	0.00828129	0.543385	0.999295	0.974651	0.167039	-2.57053e-20	5.19048e-31	0.296667
FC-CRBMUV	Alutera monoceros	70230	2099.99	299.031	0.200124	4.9969	0.644353	0.00778513	0.0069394	0.44753	0.954434	0.961127	0.225846	6.7054e-20	2.71939e-29	0.276994
FC-CRBMUV	Alutera monoceros	71053	1870.97	300.778	0.255068	3.92052	0.695425	0.00769496	0.00803777	0.523394	0.928362	0.964897	0.199572	6.03722e-20	5.17915e-27	0.2665
FC-CRBMUV	Alutera monoceros	80755	2052.74	320.656	0.240831	4.1523	0.778076	0.00677048	0.00579995	0.488786	0.988699	0.961347	0.33637	-3.76256e-20	6.01625e-30	0.226075
FC-CRBMUV	Alutera monoceros	106593	3044.92	368.4	0.144473	6.92171	0.791231	0.00512932	0.00236894	0.370008	1	0.95401	0.446994	9.03065e-21	1.61771e-29	0.202269
FC-CRBMUV	Alutera monoceros	2232	331.64	53.3092	0.255018	3.92129	0.830357	0.24496	8.67532	0.574712	0.999295	0.981116	0.0728567	-1.26628e-17	-1.09029e-27	0.832561
FC-CRBMUV	Alutera monoceros	2254	331.64	53.5713	0.257532	3.88301	0.835124	0.242569	6.83939	0.454298	0.993651	0.957471	0.295659	4.47671e-20	2.03105e-27	0.827901
FC-CRBMUV	Aluterus scriptus	3462	357.095	66.3924	0.341168	2.93111	0.811343	0.157929	4.23086	0.662063	0.965202	0.981913	0.0864699	4.69777e-18	-5.56318e-27	0.585677
FC-CRBMUV	Aluterus scriptus	34617	1024.47	209.942	0.414481	2.41265	0.861698	0.0157943	0.0426828	0.671075	0.974489	0.986963	0.0437255	8.43825e-21	1.97691e-31	0.345889
FC-CRBMUV	Aluterus scriptus	39432	1207.64	224.068	0.339771	2.94316	0.809127	0.0138656	0.032461	0.663385	0.877437	0.985896	0.0530062	-9.53516e-20	2.1363e-30	0.384303
FC-CRBMUV	Aluterus scriptus	45729	1364.09	241.296	0.308828	3.23804	0.671291	0.0119563	0.020956	0.577459	0.99718	0.977931	0.0783564	-5.17763e-20	4.23749e-28	0.265927
FC-CRBMUV	Aluterus scriptus	46159	1233.38	242.428	0.381307	2.62256	0.876381	0.0118449	0.0213631	0.602521	0.993651	0.980352	0.0673856	-8.19095e-20	5.36339e-29	0.327377
FC-CRBMUV	Aluterus scriptus	47079	1886.91	244.832	0.166163	6.0182	0.613191	0.0116135	0.0223501	0.644574	0.912999	0.97814	0.105955	1.49839e-19	7.28548e-28	0.289864
FC-CRBMUV	Aluterus scriptus	66462	1528.13	290.899	0.357654	2.796	0.718687	0.00822651	0.00759729	0.456063	0.974489	0.974254	0.114291	-3.25653e-20	4.10035e-30	0.237126
FC-CRBMUV	Aluterus scriptus	72389	2653.83	303.593	0.129162	7.7422	0.654689	0.00755294	0.0075288	0.512148	0.999295	0.965496	0.205551	-2.66573e-21	-1.97644e-29	0.266752
FC-CRBMUV	Aluterus scriptus	77624	3082.16	314.379	0.102682	9.73876	0.659518	0.00704357	0.00614027	0.478868	0.99718	0.957312	0.330741	-5.81658e-19	3.86389e-27	0.265258
FC-CRBMUV	Aluterus scriptus	78929	2124.02	317.01	0.219852	4.54852	0.664637	0.00692711	0.00544031	0.448561	0.993651	0.963339	0.257526	4.6592e-19	1.99383e-29	0.248409
FC-CRBMUV	Aluterus scriptus	92868	3037.29	343.865	0.126504	7.90489	0.712227	0.00588739	0.0039506	0.442952	0.912999	0.955475	0.226612	-2.93998e-19	-3.9795e-29	0.226015
FC-CRBMUV	Aluterus scriptus	96689	3090.62	350.868	0.127203	7.86147	0.801899	0.00565473	0.00345915	0.416927	0.954434	0.943699	0.398542	4.38738e-20	7.38688e-28	0.210749
FC-CRBMUV	Aluterus scriptus	99400	2865.04	355.753	0.152172	6.5715	0.80296	0.0055005	0.00357217	0.457217	0.988699	0.948978	0.376071	-1.69128e-18	-3.73477e-27	0.211686
FC-CRBMUV	Aluterus scriptus	102517	3324.34	361.288	0.116572	8.57838	0.76483	0.00533326	0.00336635	0.462238	0.982317	0.957151	0.2725	2.68605e-20	-1.01875e-28	0.209096
FC-CRBMUV	Aluterus scriptus	102930	2293.17	362.015	0.245969	4.06555	0.872754	0.00531186	0.00301061	0.411713	0.965202	0.942865	0.47379	-1.88074e-20	3.09095e-28	0.198499
FC-CRBMUV	Aluterus scriptus	114978	2951.5	382.615	0.165859	6.02921	0.828963	0.00475526	0.00201311	0.361331	0.974489	0.947518	0.406319	-2.72445e-21	2.19609e-29	0.204976
FC-CRBMUV	Aluterus scriptus	20325	865.647	160.868	0.340847	2.93387	0.855789	0.0269004	0.1001	0.545926	0.999295	0.976016	0.112407	1.1469e-19	3.88274e-28	0.404648
FC-CRBMUV	Ancylopsetta dendritica	20468	851.161	161.433	0.355027	2.81669	0.866958	0.0267124	0.102091	0.566212	0.99718	0.981373	0.0658174	4.8773e-19	1.79116e-28	0.394545
FC-CRBMUV	Ancylopsetta dendritica	26123	886.073	182.376	0.418113	2.3917	0.905728	0.0209298	0.084879	0.759608	0.988699	0.991269	0.0256366	-7.81759e-21	-1.47487e-31	0.396671
FC-CRBMUV	Ancylopsetta dendritica	28501	999.11	190.496	0.358793	2.78712	0.812944	0.0191835	0.0610065	0.652195	0.99718	0.987273	0.0396222	-5.67352e-18	-1.04898e-27	0.36914
FC-CRBMUV	Ancylopsetta dendritica	29658	946.926	194.324	0.415642	2.40592	0.920741	0.0184352	0.0563996	0.651637	1	0.984128	0.103119	9.41357e-19	7.63416e-27	0.385142
FC-CRBMUV	Ancylopsetta dendritica	31352	1061.03	199.796	0.349959	2.85748	0.745766	0.0174391	0.0432041	0.560203	0.993651	0.980462	0.0841282	-1.05982e-17	3.69605e-27	0.386939
FC-CRBMUV	Ancylopsetta dendritica	32204	957.955	202.493	0.44099	2.26762	0.936707	0.0169777	0.0488985	0.66914	0.99718	0.98859	0.0364928	-7.04347e-19	6.37856e-30	0.357468
FC-CRBMUV	Ancylopsetta dendritica	33864	1177.27	207.646	0.307041	3.25689	0.75884	0.0161455	0.0459281	0.693383	0.99718	0.988925	0.0349675	-1.51412e-21	6.0734e-30	0.429482
FC-CRBMUV	Ancylopsetta dendritica	37968	1181.39	219.869	0.341852	2.92524	0.807864	0.0144003	0.0322803	0.615681	0.99718	0.984131	0.0542666	-2.33233e-18	1.45189e-28	0.387644
FC-CRBMUV	Ancylopsetta dendritica	40736	1391.64	227.743	0.264321	3.78328	0.783701	0.0134218	0.0226671	0.497783	0.99718	0.97493	0.13084	-2.11845e-20	9.3723e-29	0.382634
FC-CRBMUV	Ancylopsetta dendritica	45053	1856.44	239.506	0.164276	6.08733	0.670162	0.0121357	0.0248473	0.65385	0.993651	0.980034	0.10516	2.0844e-22	-2.6035e-29	0.310677
FC-CRBMUV	Ancylopsetta dendritica	45656	1759.01	241.104	0.185427	5.39296	0.592373	0.0119754	0.0177216	0.48177	0.988699	0.968538	0.154758	-3.11712e-18	2.38964e-27	0.348186
FC-CRBMUV	Ancylopsetta dendritica	66522	2892.25	291.03	0.0999317	10.0068	0.658015	0.00821909	0.00961245	0.553645	0.99718	0.974445	0.120027	-1.83916e-18	1.24807e-27	0.2803
FC-CRBMUV	Ancylopsetta dendritica	69863	1806.21	298.249	0.269106	3.71601	0.86401	0.00782603	0.00573085	0.376871	0.965202	0.949225	0.387987	1.32541e-19	1.25894e-29	0.225039
FC-CRBMUV	Ancylopsetta dendritica	2539	259.054	56.8573	0.475437	2.10333	0.939674	0.215341	8.23831	0.699833	0.999295	0.990178	0.0414339	-5.77965e-21	3.42654e-30	0.29577
FC-CRBMUV	Ancylopsetta dendritica	3711	233.74	68.7386	0.853561	1.17156	0.984089	0.147332	3.77339	0.681722	0.988699	0.987237	0.0824239	-5.16076e-18	-1.76318e-28	0.164016
FC-CRBMUV	Anisotremus dovii	6759	367.296	92.7676	0.629591	1.58833	0.979565	0.0808921	1.01369	0.614439	0.99718	0.981216	0.138022	6.21894e-19	4.61828e-28	0.230993
FC-CRBMUV	Anisotremus dovii	7131	384.468	95.2863	0.606233	1.64953	0.979668	0.0766723	0.846371	0.583355	0.99718	0.985834	0.0470983	1.53915e-19	7.18808e-30	0.250462
FC-CRBMUV	Anisotremus dovii	13100	726.627	129.149	0.311787	3.20732	0.983705	0.0417366	0.265803	0.600501	0.974489	0.981324	0.144496	-1.06468e-18	2.61427e-25	0.67341
FC-CRBMUV	Anisotremus dovii	13141	727.456	129.351	0.312051	3.20461	0.98405	0.0416064	0.229142	0.529004	0.993651	0.983254	0.106929	2.42974e-18	1.46678e-26	0.671547
FC-CRBMUV	Anisotremus dovii	27883	899.252	188.419	0.433298	2.30788	0.842845	0.0196087	0.0689187	0.695517	0.896038	0.980961	0.110402	2.03139e-21	5.29756e-29	0.323148
FC-CRBMUV	Anisotremus dovii	28057	991.737	189.006	0.358474	2.7896	0.860644	0.0194871	0.0743705	0.766022	0.988699	0.986002	0.137299	-4.78088e-19	-9.55146e-28	0.276106
FC-CRBMUV	Anisotremus dovii	30348	853.026	196.571	0.524101	1.90803	0.922488	0.018016	0.0574623	0.697018	0.974489	0.98875	0.0402667	-1.13266e-22	3.44963e-33	0.249317
FC-CRBMUV	Anisotremus dovii	30465	1009.55	196.95	0.375623	2.66224	0.908562	0.0179468	0.0575643	0.69931	0.988699	0.988873	0.0855318	-6.49854e-19	-4.01641e-29	0.330736
FC-CRBMUV	Anisotremus dovii	30568	979.068	197.283	0.400729	2.49545	0.913459	0.0178864	0.0586825	0.715365	0.982317	0.987632	0.129257	-2.03448e-19	-2.44151e-29	0.32686
FC-CRBMUV	Anisotremus dovii	32085	893.127	202.119	0.505458	1.9784	0.937281	0.0170407	0.0398949	0.553853	0.99718	0.984083	0.0655524	-1.13376e-19	8.35929e-31	0.283178
FC-CRBMUV	Anisotremus dovii	32335	913.671	202.904	0.486747	2.05446	0.93828	0.0169089	0.0502576	0.691021	0.942163	0.990507	0.0434677	-9.70496e-22	3.8091e-31	0.30288
FC-CRBMUV	Anisotremus dovii	32471	1163.52	203.331	0.301411	3.31773	0.756124	0.0168381	0.0511359	0.709869	0.912999	0.987949	0.0445204	-9.10162e-21	2.39332e-31	0.366653
FC-CRBMUV	Anisotremus dovii	32854	924.039	204.526	0.483524	2.06815	0.895644	0.0166418	0.0478154	0.676923	0.999295	0.984792	0.108769	1.27356e-19	7.039e-29	0.276509
FC-CRBMUV	Anisotremus dovii	33093	920.357	205.269	0.490945	2.03689	0.951495	0.0165216	0.0463011	0.670885	0.965202	0.991662	0.0278494	-1.27597e-20	-3.97251e-30	0.291474
FC-CRBMUV	Anisotremus dovii	35243	1210.67	211.832	0.302154	3.30957	0.77954	0.0155137	0.0348996	0.578169	0.965202	0.976281	0.189382	-1.65302e-19	1.14709e-30	0.281846
FC-CRBMUV	Anisotremus dovii	35710	980.181	213.231	0.467076	2.14098	0.885687	0.0153108	0.0381019	0.643003	0.942163	0.98786	0.0676005	-2.97184e-20	-1.85872e-29	0.315414
FC-CRBMUV	Anisotremus dovii	35995	949.713	214.08	0.501496	1.99403	0.930825	0.0151896	0.0315831	0.553586	0.99718	0.985311	0.0597949	-8.23035e-20	4.34286e-31	0.283319
FC-CRBMUV	Anisotremus dovii	36191	1446.7	214.662	0.217298	4.60198	0.64056	0.0151073	0.041591	0.716835	0.99718	0.988253	0.0836055	-5.55425e-19	-1.59425e-30	0.315201
FC-CRBMUV	Anisotremus interruptus	39324	1253.16	223.761	0.31467	3.17793	0.767837	0.0139037	0.0293774	0.597269	0.988699	0.978156	0.194545	-1.17589e-18	1.5706e-28	0.320644
FC-CRBMUV	Anisotremus interruptus	40461	1310.31	226.973	0.296143	3.37675	0.738555	0.013513	0.0294522	0.638425	0.999295	0.986397	0.0490318	3.61085e-21	-1.17878e-32	0.342503
FC-CRBMUV	Anisotremus interruptus	40755	1180.35	227.796	0.367596	2.72038	0.818801	0.0134155	0.0233173	0.52785	0.982317	0.98377	0.065846	-7.58087e-20	-5.0119e-30	0.298414
FC-CRBMUV	Anisotremus interruptus	42974	1418.76	233.915	0.268287	3.72735	0.717944	0.0127228	0.0255808	0.614682	0.896038	0.974526	0.1967	-2.07006e-19	1.861e-27	0.333666
FC-CRBMUV	Anisotremus interruptus	46812	1933.13	244.137	0.157414	6.35266	0.661056	0.0116797	0.0224608	0.646128	0.835116	0.982609	0.159205	-1.0446e-18	4.79977e-30	0.29812
FC-CRBMUV	Anisotremus interruptus	48426	1867.39	248.31	0.174509	5.73036	0.59671	0.0112904	0.0206254	0.633821	0.988699	0.981751	0.14537	-1.3866e-18	3.83603e-29	0.326334
FC-CRBMUV	Anisotremus interruptus	49385	1606.96	250.757	0.240323	4.16106	0.61834	0.0110712	0.0184222	0.594346	0.896038	0.981783	0.121559	-9.74442e-19	-1.63004e-28	0.299129
FC-CRBMUV	Anisotremus interruptus	49741	2019.68	251.659	0.153236	6.52587	0.746055	0.0109919	0.0173265	0.563222	1	0.97273	0.232785	-9.17062e-20	3.04418e-29	0.233293
FC-CRBMUV	Anisotremus interruptus	8259	542.149	102.546	0.353101	2.83205	0.82955	0.0662005	0.634665	0.55981	1	0.970907	0.188114	8.31674e-20	2.17745e-28	0.23778
FC-CRBMUV	Anisotremus interruptus	17258	1037.24	148.235	0.201576	4.96092	0.624543	0.031681	0.132642	0.515885	0.942163	0.970249	0.222723	-1.0342e-20	3.75175e-29	0.657103
FC-CRBMUV	Anisotremus pacifici	26153	817.872	182.48	0.491316	2.03535	0.937686	0.0209058	0.0688734	0.62323	0.988699	0.986939	0.0415199	-1.692e-18	6.63929e-29	0.306934
FC-CRBMUV	Anisotremus pacifici	29965	880.843	195.327	0.485319	2.0605	0.924617	0.0182463	0.0592358	0.699888	0.982317	0.98978	0.0423792	-4.83052e-21	1.92872e-29	0.317759
FC-CRBMUV	Anisotremus pacifici	32787	885.754	204.318	0.525152	1.90421	0.942616	0.0166758	0.0473813	0.671702	0.982317	0.988733	0.0379751	-2.59279e-23	-5.57482e-32	0.284146
FC-CRBMUV	Anisotremus pacifici	36405	998.725	215.296	0.458648	2.18032	0.870725	0.0150185	0.034078	0.601095	0.982317	0.984578	0.0513735	-2.3436e-20	7.77526e-31	0.329551
FC-CRBMUV	Anisotremus pacifici	37456	1067.78	218.381	0.412828	2.42232	0.844174	0.0145971	0.030422	0.567614	0.99718	0.974803	0.253294	3.27918e-20	1.11536e-27	0.286123
FC-CRBMUV	Anisotremus pacifici	38586	1010.72	221.651	0.47465	2.10681	0.912932	0.0141696	0.0279969	0.557211	0.999295	0.983396	0.0843717	1.64266e-19	-6.55612e-32	0.275146
FC-CRBMUV	Anisotremus pacifici	39093	956.791	223.103	0.53663	1.86348	0.865253	0.0139859	0.0292385	0.59521	0.982317	0.983557	0.0587494	1.30996e-20	-2.22781e-30	0.239481
FC-CRBMUV	Anisotremus pacifici	41874	1321.66	230.902	0.301241	3.3196	0.712882	0.013057	0.0199821	0.463379	0.993651	0.970123	0.214331	6.65757e-20	3.69265e-28	0.339644
FC-CRBMUV	Anisotremus pacifici	44041	1245.21	236.801	0.356929	2.80168	0.747611	0.0124146	0.0218756	0.564807	0.974489	0.9808	0.0761723	1.30501e-19	1.00908e-31	0.330329
FC-CRBMUV	Anisotremus pacifici	44827	1583.79	238.905	0.224573	4.4529	0.605697	0.0121969	0.0227661	0.603123	0.954434	0.982862	0.0697918	-4.93858e-21	-8.94679e-32	0.32627
FC-CRBMUV	Anisotremus pacifici	47311	1786.61	245.435	0.186256	5.36895	0.655668	0.0115565	0.0181225	0.541041	0.974489	0.979141	0.0863911	-2.02522e-18	5.82209e-28	0.327625
FC-CRBMUV	Anisotremus pacifici	47671	1593.3	246.367	0.235976	4.23771	0.66797	0.0114692	0.0200048	0.599556	0.999295	0.982174	0.0814858	-1.0477e-18	7.35925e-28	0.285575
FC-CRBMUV	Anisotremus pacifici	51497	1556.21	256.063	0.267211	3.74236	0.754446	0.0106171	0.0156757	0.541563	0.988699	0.970663	0.167676	-1.96986e-20	8.8431e-30	0.280232
FC-CRBMUV	Anisotremus pacifici	52783	1661.66	259.24	0.240225	4.16276	0.540604	0.0103584	0.0143735	0.535983	0.99718	0.981691	0.0768454	-3.47217e-18	-1.33114e-29	0.358338
FC-CRBMUV	Anisotremus pacifici	56130	1991.53	267.333	0.17784	5.62303	0.63154	0.00974078	0.0105186	0.449051	0.942163	0.968079	0.177666	-2.36728e-20	1.16287e-28	0.301403
FC-CRBMUV	Apogon dovii	59603	2121.01	275.479	0.166492	6.00628	0.560468	0.0091732	0.0114547	0.537777	0.988699	0.976747	0.165628	-3.43567e-18	-3.74282e-30	0.331812
FC-CRBMUV	Apogon dovii	63491	2145.98	284.322	0.173249	5.77202	0.59079	0.00861146	0.00806082	0.444369	0.954434	0.971124	0.12993	8.01523e-21	7.32026e-30	0.3085
FC-CRBMUV	Apogon dovii	87571	3668.91	333.914	0.0817516	12.2322	0.685804	0.00624351	0.00426424	0.429558	0.988699	0.959975	0.267215	-9.50637e-21	3.24109e-28	0.253311
FC-CRBMUV	Apogon dovii	99307	2442.75	355.586	0.209138	4.78153	0.79622	0.00550565	0.00346034	0.443709	0.942163	0.952727	0.421178	2.04782e-20	4.0513e-28	0.212247
FC-CRBMUV	Apogon dovii	99933	2459.72	356.705	0.207562	4.81783	0.779357	0.00547117	0.00312402	0.408823	0.99718	0.946525	0.509345	-3.2301e-19	-8.5642e-29	0.210859
FC-CRBMUV	Apogon dovii	1481	170.669	43.4243	0.638933	1.56511	0.947537	0.369176	16.2006	0.456195	0.974489	0.949574	0.28635	1.28798e-19	1.8003e-28	0.21357
FC-CRBMUV	Apogon dovii	5907	385.765	86.7238	0.498807	2.00478	0.874981	0.0925597	1.39436	0.63708	0.99718	0.980974	0.164776	5.87049e-19	-4.90905e-29	0.253058
FC-CRBMUV	Apogon dovii	10779	803.47	117.151	0.209821	4.76597	0.653748	0.0507236	0.394893	0.615851	0.954434	0.981733	0.109414	1.67226e-19	-9.99863e-30	0.471935
FC-CRBMUV	Apogon dovii	28954	983.051	192.004	0.376501	2.65603	0.812789	0.0188834	0.0680761	0.748967	0.999295	0.989252	0.0602246	-4.7427e-22	7.90153e-34	0.318227
FC-CRBMUV	Apogon dovii	29898	866.198	195.108	0.500746	1.99702	0.90754	0.0182872	0.0608917	0.717405	1	0.98996	0.0319097	-2.01356e-22	-1.3808e-33	0.302697
FC-CRBMUV	Apogon dovii	33569	925.026	206.74	0.492992	2.02843	0.927218	0.0162873	0.044244	0.65933	0.993651	0.987926	0.0376887	-1.88592e-22	9.03654e-33	0.302379
FC-CRBMUV	Apogon dovii	35379	1090.78	212.24	0.373661	2.67622	0.817558	0.0154541	0.0410845	0.679361	0.993651	0.987683	0.0440262	-3.30756e-21	8.76065e-32	0.347707
FC-CRBMUV	Ariopsis seemanni	36378	1343.32	215.216	0.253333	3.94738	0.70021	0.0150297	0.0395061	0.687429	0.982317	0.986929	0.0494042	7.29045e-20	1.16191e-30	0.392426
FC-CRBMUV	Ariopsis seemanni	38513	1348.24	221.441	0.266246	3.75593	0.616425	0.0141965	0.0333968	0.65505	0.999295	0.986103	0.0571023	-8.20931e-19	-4.30268e-30	0.367511
FC-CRBMUV	Ariopsis seemanni	38830	1045.9	222.351	0.446067	2.24182	0.862544	0.0140806	0.0309912	0.620916	0.988699	0.986598	0.0462677	1.20682e-20	7.03259e-30	0.316969
FC-CRBMUV	Ariopsis seemanni	39244	1477.22	223.533	0.225993	4.42492	0.557364	0.0139321	0.0313948	0.63962	0.912999	0.984458	0.0646788	8.94813e-20	1.44914e-28	0.462753
FC-CRBMUV	Ariopsis seemanni	39420	1263.29	224.034	0.310397	3.22168	0.733559	0.0138699	0.0308201	0.6381	0.954434	0.986368	0.0470482	2.66115e-22	8.69941e-31	0.376084
FC-CRBMUV	Ariopsis seemanni	39542	1457.05	224.38	0.234056	4.27249	0.579914	0.0138271	0.0314818	0.657876	0.993651	0.98536	0.0846796	-1.0849e-18	1.06736e-29	0.374262
FC-CRBMUV	Ariopsis seemanni	40165	1111.94	226.141	0.408222	2.44965	0.89672	0.0136126	0.0290641	0.623927	0.99718	0.987639	0.0439833	-1.47815e-23	1.44811e-34	0.286895
FC-CRBMUV	Ariopsis seemanni	40280	1226.02	226.464	0.336747	2.96959	0.704861	0.0135737	0.0301878	0.644527	0.982317	0.987524	0.0560712	1.33329e-20	-6.99467e-31	0.333273
FC-CRBMUV	Ariopsis seemanni	41113	1210.12	228.794	0.352802	2.83445	0.723553	0.0132987	0.0287507	0.642303	0.982317	0.984808	0.0618788	1.36781e-21	8.93331e-32	0.343351
FC-CRBMUV	Ariopsis seemanni	43343	1917.65	234.917	0.148112	6.75166	0.566457	0.0126145	0.0245453	0.591051	0.982317	0.969837	0.339843	-8.84124e-18	-2.61807e-26	0.448233
FC-CRBMUV	Ariopsis seemanni	43572	1545.83	235.537	0.229137	4.3642	0.626259	0.0125482	0.0257827	0.647025	0.896038	0.979595	0.167633	-2.04397e-18	3.29274e-29	0.342954
FC-CRBMUV	Ariopsis seemanni	44167	1581.4	237.14	0.221934	4.50585	0.625117	0.0123792	0.0244732	0.629957	0.993651	0.981668	0.126529	-7.17529e-19	6.16834e-29	0.350037
FC-CRBMUV	Atherinella colombiensis	45697	1468.79	241.212	0.266181	3.75684	0.649585	0.0119647	0.0212804	0.59303	0.993651	0.983272	0.0657816	-6.31632e-20	-2.29507e-30	0.327582
FC-CRBMUV	Atherinella colombiensis	46426	1673.28	243.128	0.208369	4.79919	0.709563	0.0117768	0.0221981	0.633663	0.993651	0.980577	0.206196	-3.37284e-19	-7.05871e-30	0.316976
FC-CRBMUV	Atherinella colombiensis	47575	1796.42	246.119	0.185256	5.39793	0.637794	0.0114924	0.0219247	0.653475	0.99718	0.983272	0.0984647	-6.89237e-19	-3.91099e-29	0.290002
FC-CRBMUV	Atherinella colombiensis	48105	1300.75	247.486	0.357283	2.7989	0.789383	0.0113658	0.0180569	0.562639	0.982317	0.984343	0.0578686	-1.79773e-21	-7.51236e-34	0.294331
FC-CRBMUV	Atherinella colombiensis	54194	2376.77	262.682	0.120555	8.29495	0.633204	0.0100888	0.0162875	0.626974	0.99718	0.98002	0.125698	4.3255e-20	2.37055e-31	0.281356
FC-CRBMUV	Atherinella colombiensis	81309	2729.56	321.754	0.13714	7.29182	0.717973	0.00672435	0.00564396	0.482586	0.988699	0.964758	0.198383	4.97298e-21	2.75619e-30	0.221253
FC-CRBMUV	Atherinella colombiensis	1471	203.154	43.2774	0.447889	2.2327	0.906346	0.371686	25.857	0.731441	0.982317	0.989183	0.063089	4.10258e-20	-6.80796e-30	0.401279
FC-CRBMUV	Atherinella colombiensis	3666	253.338	68.3205	0.717796	1.39315	0.950233	0.149141	3.28004	0.574646	1	0.974257	0.162442	5.55312e-21	-1.95172e-28	0.192642
FC-CRBMUV	Atherinella colombiensis	4223	350.953	73.3273	0.430856	2.32096	0.829503	0.12947	2.47932	0.584616	0.965202	0.982519	0.0751196	-6.4946e-18	-2.16727e-29	0.352148
FC-CRBMUV	Atherinella colombiensis	26618	838.759	184.095	0.475456	2.10324	0.942364	0.0205406	0.0784009	0.730196	0.974489	0.99322	0.0222136	-1.92507e-19	-9.81041e-29	0.308774
FC-CRBMUV	Atherinella pachylepis	30701	963.026	197.711	0.415993	2.40389	0.861033	0.0178089	0.053802	0.659517	0.954434	0.983	0.128248	-7.50018e-21	1.35381e-30	0.343457
FC-CRBMUV	Atherinella pachylepis	32310	961.252	202.826	0.439413	2.27577	0.875373	0.016922	0.0475961	0.667692	0.999295	0.986034	0.0838991	4.01808e-18	4.49542e-28	0.321046
FC-CRBMUV	Atherinella pachylepis	33032	954.6	205.08	0.455514	2.19532	0.888148	0.0165521	0.0456358	0.65637	0.974489	0.989962	0.0694552	-1.54006e-21	-2.39234e-33	0.320603
FC-CRBMUV	Atherinella pachylepis	34663	942.382	210.082	0.490481	2.03881	0.927761	0.0157733	0.0400591	0.637226	0.993651	0.988381	0.0454083	2.50425e-19	-7.2244e-30	0.286941
FC-CRBMUV	Atherinella pachylepis	37910	1133.12	219.701	0.371034	2.69517	0.804251	0.0144223	0.0334444	0.635566	0.974489	0.985043	0.0651227	5.53402e-19	2.54102e-30	0.307382
FC-CRBMUV	Atherinella pachylepis	37934	1025.55	219.77	0.453233	2.20637	0.919256	0.0144132	0.0336659	0.642065	0.954434	0.988352	0.0466902	1.27568e-20	1.15935e-29	0.310122
FC-CRBMUV	Atherinella pachylepis	40717	1114.52	227.689	0.411914	2.42769	0.876615	0.0134281	0.0281552	0.61987	0.99718	0.985311	0.0435464	-8.056e-24	1.93466e-34	0.320921
FC-CRBMUV	Atherinella pachylepis	42323	1405.56	232.136	0.269208	3.71461	0.692288	0.0129185	0.0281311	0.662243	0.974489	0.986307	0.0956289	2.0277e-19	-2.7224e-29	0.278992
FC-CRBMUV	Atherinella pachylepis	42826	1378.93	233.512	0.283029	3.53321	0.678862	0.0127668	0.0250475	0.610053	0.993651	0.984663	0.0494615	-4.53291e-22	-5.67046e-33	0.366167
FC-CRBMUV	Atherinella pachylepis	44091	1249.5	236.935	0.354884	2.81782	0.756563	0.0124005	0.0246674	0.630225	0.99718	0.977606	0.197237	1.45567e-18	1.01749e-27	0.328924
FC-CRBMUV	Atherinella starksi	45974	1151.62	241.942	0.435616	2.2956	0.818582	0.0118926	0.0197068	0.561332	0.988699	0.983393	0.0548108	2.09661e-19	2.07984e-29	0.302025
FC-CRBMUV	Atherinella starksi	46390	2034.2	243.034	0.140879	7.09829	0.745568	0.0117859	0.0245825	0.681799	0.993651	0.981806	0.103356	-7.81679e-20	-6.26991e-30	0.220347
FC-CRBMUV	Atherinella starksi	50413	1840.96	253.353	0.186922	5.34981	0.616092	0.0108454	0.0177882	0.591537	0.982317	0.976731	0.139233	-7.06397e-18	1.62382e-28	0.29203
FC-CRBMUV	Atherinella starksi	79862	2368.55	318.878	0.17889	5.59002	0.753571	0.00684618	0.00645285	0.531431	1	0.964607	0.306415	-1.73012e-19	8.25045e-29	0.231267
FC-CRBMUV	Atherinella starksi	3620	263.581	67.8906	0.654774	1.52725	0.953384	0.151036	3.36311	0.588923	0.974489	0.986772	0.0415127	-8.63748e-21	-2.24704e-31	0.2023
FC-CRBMUV	Atherinella starksi	45670	1523.63	241.141	0.24722	4.04498	0.740326	0.0119718	0.02461	0.679808	0.99718	0.981968	0.203983	-9.5484e-19	-1.41696e-29	0.302675
FC-CRBMUV	Atherinella starksi	1831	197.296	48.2836	0.591098	1.69177	0.887542	0.298607	17.1955	0.75405	0.999295	0.991671	0.0524548	1.16882e-20	9.09027e-31	0.244962
FC-CRBMUV	Atherinella starksi	16043	627.203	142.922	0.512483	1.95129	0.914496	0.0340803	0.138085	0.4702	0.982317	0.971078	0.140486	-4.53188e-20	-2.73153e-30	0.178437
FC-CRBMUV	Atherinella starksi	24347	890.6	176.067	0.385736	2.59245	0.887378	0.0224566	0.100986	0.783738	0.993651	0.994043	0.0224714	1.22192e-23	3.25619e-31	0.434289
FC-CRBMUV	Atherinella starksi	25035	896.701	178.537	0.391257	2.55586	0.892895	0.0218394	0.0943715	0.775035	0.988699	0.994062	0.0173011	-2.81931e-22	-1.39953e-33	0.423792
FC-CRBMUV	Atherinella starksi	27390	908.943	186.746	0.416609	2.40033	0.912118	0.0199617	0.0716755	0.706605	0.974489	0.991591	0.023875	4.93748e-19	2.16549e-29	0.394655
FC-CRBMUV	Atherinella starksi	27403	881.973	186.79	0.442688	2.25893	0.921202	0.0199522	0.0756807	0.745636	0.993651	0.992916	0.0250351	-2.8047e-21	-8.38691e-33	0.325173
FC-CRBMUV	Atherinella starksi	30922	1155.45	198.422	0.291054	3.43579	0.681371	0.0176816	0.0489281	0.610124	0.954434	0.982512	0.0895706	2.03059e-19	1.96766e-27	0.476219
FC-CRBMUV	Atherinella starksi	33394	1092.88	206.2	0.351342	2.84623	0.834662	0.0163727	0.0443991	0.653969	0.999295	0.988961	0.0392856	5.24787e-19	1.20174e-27	0.425303
FC-CRBMUV	Atherinella starksi	43024	1761	234.051	0.174342	5.73585	0.665841	0.012708	0.0197572	0.472515	1	0.96327	0.207299	-3.46647e-20	2.91027e-28	0.372747
FC-CRBMUV	Atherinella starksi	51766	1689.95	256.73	0.227777	4.39027	0.681661	0.010562	0.0165914	0.581558	0.99718	0.978329	0.110409	-7.03489e-19	3.70111e-28	0.272013
FC-CRBMUV	Atherinella starksi	80464	2468.06	320.078	0.165997	6.02421	0.776725	0.00679496	0.00499352	0.434433	0.999295	0.966625	0.179105	-3.99039e-20	3.50009e-29	0.233632
FC-CRBMUV	Atherinella starksi	83559	2694.36	326.176	0.144641	6.91367	0.71407	0.00654328	0.00406645	0.393031	0.974489	0.965525	0.18835	2.73003e-20	1.31703e-28	0.243398
FC-CRBMUV	Bagre panamensis	5141	341.137	80.9057	0.555136	1.80136	0.8896	0.106351	1.94817	0.677909	0.974489	0.987957	0.0359772	-2.14348e-18	1.04729e-28	0.2221
FC-CRBMUV	Bagre panamensis	5440	336.794	83.2251	0.602671	1.65928	0.893268	0.100506	1.78305	0.693644	0.954434	0.98857	0.0439475	-4.40847e-18	3.83107e-28	0.21402
FC-CRBMUV	Bagre panamensis	5601	413.279	84.4477	0.412086	2.42668	0.869991	0.0976165	1.6618	0.685953	0.954434	0.989351	0.031702	-3.14907e-20	-1.29402e-30	0.313096
FC-CRBMUV	Bagre panamensis	7040	442.007	94.6763	0.452818	2.20839	0.887432	0.0776634	1.01152	0.660931	0.965202	0.987985	0.0500344	-7.92019e-19	1.0576e-28	0.296537
FC-CRBMUV	Bagre panamensis	7067	363.279	94.8577	0.672921	1.48606	0.964252	0.0773666	1.0984	0.720813	0.954434	0.992505	0.0207026	1.76208e-18	1.29243e-27	0.19946
FC-CRBMUV	Bagre panamensis	7627	376.894	98.5444	0.674721	1.48209	0.955166	0.0716861	0.960322	0.732865	0.974489	0.992595	0.0257082	3.50222e-18	4.39083e-27	0.191575
FC-CRBMUV	Bagre panamensis	28475	832.943	190.409	0.515754	1.93891	0.935078	0.0192011	0.0581193	0.625966	0.896038	0.990094	0.0334493	1.65453e-18	1.79884e-27	0.283004
FC-CRBMUV	Bagre panamensis	29157	1075.55	192.675	0.31673	3.15727	0.757462	0.0187519	0.0520647	0.594334	0.982317	0.984199	0.0594583	-1.8208e-16	-9.33293e-25	0.366168
FC-CRBMUV	Bagre panamensis	29257	939.772	193.006	0.416289	2.40218	0.894709	0.0186878	0.0485233	0.558873	0.982317	0.985953	0.0405388	-1.26042e-16	-5.37054e-25	0.359378
FC-CRBMUV	Bagre panamensis	29784	847.671	194.736	0.52088	1.91983	0.932528	0.0183572	0.0526893	0.62048	0.896038	0.991021	0.0239753	1.1436e-18	1.36365e-27	0.277013
FC-CRBMUV	Bagre panamensis	32078	931.127	202.096	0.464943	2.1508	0.921861	0.0170444	0.043974	0.597907	0.982317	0.986351	0.0654521	6.8328e-20	5.22525e-29	0.290699
FC-CRBMUV	Bagre panamensis	33070	946.784	205.198	0.463599	2.15704	0.927682	0.0165331	0.0465748	0.672939	0.857148	0.991667	0.018805	1.91463e-20	1.42945e-29	0.309563
FC-CRBMUV	Bagre panamensis	33169	1012.58	205.504	0.406519	2.45991	0.877812	0.0164838	0.0417291	0.612784	0.974489	0.98736	0.0340795	-8.39784e-18	2.95089e-27	0.34196
FC-CRBMUV	Bagre panamensis	33553	911.127	206.691	0.507906	1.96887	0.923206	0.0162951	0.0407821	0.608583	0.965202	0.988804	0.0420498	1.13035e-20	1.4457e-29	0.28398
FC-CRBMUV	Bagre panamensis	34332	960.683	209.076	0.467464	2.1392	0.932985	0.0159254	0.034653	0.541812	0.988699	0.982748	0.0712526	-3.93797e-18	-5.49709e-28	0.308386
FC-CRBMUV	Bagre panamensis	34481	1232.77	209.529	0.28512	3.50729	0.725366	0.0158566	0.044787	0.699626	0.99718	0.987899	0.055885	-1.33446e-20	-8.7948e-30	0.410105
FC-CRBMUV	Bagre panamensis	35745	964.784	213.335	0.482575	2.07222	0.938534	0.0152958	0.031057	0.531193	0.974489	0.983644	0.0510727	-1.32716e-18	-2.82825e-28	0.300434
FC-CRBMUV	Bagre pinnimaculatus	37327	1245.9	218.005	0.302182	3.30926	0.703288	0.0146476	0.0360748	0.662278	0.982317	0.987518	0.0414769	-4.6986e-22	-9.86664e-32	0.386028
FC-CRBMUV	Bagre pinnimaculatus	45710	1522.62	241.246	0.247762	4.03612	0.596145	0.0119613	0.0217082	0.602974	0.993651	0.986035	0.0510656	-7.73177e-18	2.90408e-27	0.374623
FC-CRBMUV	Bagre pinnimaculatus	51561	1944.88	256.222	0.171295	5.83788	0.581637	0.0106039	0.0172775	0.610638	0.99718	0.983466	0.0765088	-1.54697e-17	5.82743e-27	0.340596
FC-CRBMUV	Bagre pinnimaculatus	80547	2446.97	320.243	0.169045	5.9156	0.763674	0.00678796	0.00552732	0.463593	0.988699	0.959792	0.183237	-1.58455e-19	1.10464e-26	0.21419
FC-CRBMUV	Bagre pinnimaculatus	34350	1159.19	209.131	0.321237	3.11297	0.737663	0.015917	0.0450864	0.701545	0.942163	0.991691	0.051173	1.5651e-20	8.60498e-31	0.409792
FC-CRBMUV	Bagre pinnimaculatus	34727	1173.72	210.276	0.316773	3.15683	0.623689	0.0157442	0.0434614	0.690856	0.942163	0.990007	0.0463035	8.14951e-21	7.89593e-31	0.372097
FC-CRBMUV	Bagre pinnimaculatus	35021	1115.91	211.164	0.353409	2.82959	0.739995	0.0156121	0.0421131	0.679989	0.974489	0.989482	0.0501418	-1.61282e-19	1.27695e-28	0.413977
FC-CRBMUV	Bagre pinnimaculatus	36264	1075.11	214.878	0.394258	2.53641	0.789274	0.0150769	0.0385455	0.669813	0.965202	0.991563	0.0321962	5.41687e-23	1.32342e-31	0.373092
FC-CRBMUV	Bagre pinnimaculatus	38409	1221.11	221.142	0.323693	3.08935	0.628533	0.0142349	0.0310025	0.605497	0.993651	0.986017	0.0849016	-8.48988e-18	1.89655e-27	0.411814
FC-CRBMUV	Bagre pinnimaculatus	38434	1537.61	221.214	0.204284	4.89516	0.534965	0.0142257	0.0359521	0.696656	0.928362	0.987802	0.0819799	-5.89679e-20	6.83503e-30	0.348498
FC-CRBMUV	Bagre pinnimaculatus	39327	1542.9	223.769	0.207599	4.81697	0.574553	0.0139027	0.0319053	0.64996	0.982317	0.987018	0.0882601	-3.04233e-20	1.04563e-27	0.34759
FC-CRBMUV	Bagre pinnimaculatus	39665	1223.94	224.729	0.332735	3.0054	0.644813	0.0137842	0.0297093	0.61938	0.982317	0.98741	0.0736802	-3.85761e-18	-1.98464e-28	0.387705
FC-CRBMUV	Bagre pinnimaculatus	14563	764.049	136.17	0.313486	3.18993	0.733578	0.0375438	0.217768	0.614612	0.988699	0.986201	0.0454871	-8.487e-20	1.31874e-29	0.59264
FC-CRBMUV	Bairdiella ensifera	14760	774.877	137.088	0.308909	3.2372	0.720703	0.0370427	0.209927	0.601954	0.982317	0.97968	0.130933	-3.38636e-21	5.31469e-28	0.595006
FC-CRBMUV	Bairdiella ensifera	25178	873.487	179.046	0.414685	2.41147	0.867818	0.0217154	0.0661085	0.565286	0.982317	0.985386	0.0505786	-3.0332e-17	-7.42373e-26	0.405459
FC-CRBMUV	Bairdiella ensifera	26322	956.098	183.069	0.361846	2.7636	0.843465	0.0207716	0.083362	0.757706	0.999295	0.991635	0.0409112	7.72403e-19	1.0067e-27	0.37635
FC-CRBMUV	Bairdiella ensifera	27043	937.428	185.559	0.386713	2.5859	0.915905	0.0202178	0.0585014	0.563641	0.999295	0.977451	0.100692	-1.86757e-18	2.82365e-27	0.424512
FC-CRBMUV	Bairdiella ensifera	27597	963.286	187.45	0.373733	2.67571	0.918033	0.0198119	0.05711	0.576414	0.999295	0.981569	0.0596302	-3.20584e-18	2.03211e-27	0.420996
[truncated: 9,199 more rows]
